# Supplementary material for: Treatments of wood ash amended biochar to reduce nutrient leaching and immobilise lead, copper, zinc and cadmium in aqueous solution: column experiments
Source: Royal Society of Chemistry journal article supplement (doi:10.1039/d1ew00962a), 2022-01-01
Supplement: d1ew00962a1.xlsx [file d1ew00962a1.xlsx]

## Sheet: metal WA v WAS characterisation
Metal	Sorbent	Mass per unit mass of sorbent (g/kg)	log scale
P	WA	47.7482	1.67896
P	WAS	61.9646	1.79214
P	WAR	55.4407	1.74383
P	WASR	72.8313	1.86232
N	WA	2.19	0.340444
N	WAS	2.36	0.372912
N	WAR	2.69	0.429752
N	WASR	2.3	0.361728
S	WA	12.34	1.09132
S	WAS	14.57	1.16346
S	WAR	5	0.69897
S	WASR	6.49	0.812245
Ca	WA	177.901	2.25018
Ca	WAS	214.983	2.3324
Ca	WAR	196.105	2.29249
Ca	WASR	238.147	2.37684
K	WA	29.5739	1.47091
K	WAS	13.5066	1.13055
K	WAR	11.9309	1.07667
K	WASR	28.8267	1.4598
Mg	WA	4.49408	0.652641
Mg	WAS	5.09727	0.707337
Mg	WAR	4.82346	0.683358
Mg	WASR	5.15973	0.712627
Na	WA	32.1761	1.50753
Na	WAS	19.0141	1.27907
Na	WAR	16.7056	1.22286
Na	WASR	33.013	1.51868

## Sheet: nutrient leaching data
PO43-			SO42-			NO3-	SD
WASGr	SD		WASGr	SD		WASGr
0.854667	0.0430155		0	0		43.535	2.8822
0.59	0.142534		245.474	9.38873		5.92033	0.288309
0.489	0.195031		142.38	12.1523		2.99733	0.282666
0.390667	0.224883		82.5357	5.55314		1.518	0.100195
0.343	0.154149		58.6697	4.57072		0.957	0.228296
0.26	0.135765		41.118	4.99215		0.625333	0.127555
0	0		29.755	5.29054		0.437	0.084788
0	0		15.4467	2.82453		0.342	0
PO43-			SO42-			NO3-	SD
WAGr	SD		WAGr	SD		WAGr
0.722667	0.155995		0	0		45.9887	14.5811
0.369	0.308453		213.237	91.4888		5.45333	3.16414
0.305333	0.140319		139.341	15.1606		2.96133	0.192136
0	0		60.072	30.1039		1.072	0.440242
0	0		58.3987	8.71573		3.60633	4.40664
0	0		38.1297	3.01416		0.597	0.173277
0	0		18.2997	8.97597		1.6885	1.88868
0	0		31.9263	20.6806		0.6945	0.539522
PO43-			SO42-			NO3-	SD
WA	SD		WA	SD		WA
0.827	0.385561		0	0		45.1633	11.1295
0.363667	0.111132		301.561	126.915		10.811	5.8724
0.456	0.215446		232.28	98.9869		4.87733	2.47259
0.365	0.177553		114.043	44.0103		1.77733	1.00154
0.4415	0.033234		71.0337	23.6592		1.04833	0.434678
0.3085	0.173241		45.842	11.4994		0.652667	0.272979
0.211333	0.06124		28.665	4.66327		0.378333	0.0893159
0.293	0		15.5567	1.94828		0	0
PO43-			SO42-			NO3-	SD
WAS	SD		WAS	SD		WAS
0.683333	0.220276		551.961	0		25.031	7.56229
0.474667	0.0885965		529.439	47.2342		13.9393	2.65891
0.299333	0.0485215		347.838	77.1867		6.93233	2.67104
0.218667	0.0285715		171.794	35.8096		2.552	0.547843
0.209667	0.0181751		102.19	6.50697		1.54433	0.21903
0.190333	0.0266333		57.0467	3.93936		1.01733	0.0868005
0.219333	0.0510523		29.232	3.70529		0.678	0.106925
0.181333	0.0325628		13.3007	2.53515		0.430667	0.0279344

## Sheet: removal rinsed w dilution
	Cd % immobilised	Sd	Pb % immobilised	Sd	Zn % immobilised	Sd	Cu % immobilised
WAGr 0	0.976402	0.0222529	0.92429	0.032564	0.958917	0.0183536	0.952455	0.0322822
WAGr 200	1	0	0.992429	0.00154542	0.9797	0.00410115	0.992765	0.00263515
WAGr 800	1	0	0.989274	0.00472133	0.9826	0.0011839	0.982429	0.00842869
WASGr 0	0.965272	0.0260606	0.921767	0.0310754	0.948284	0.0222854	0.937984	0.0409608
WASGr 200	1	0	0.989905	0.0017845	0.980184	0.000683525	0.990181	0.00073086
WASGr 800	1	0	0.97918	0.00965114	0.980667	0.00448217	0.97261	0.00950118
WA 0	1	0	0.962776	0.000892248	0.986467	0.000683525	0.992765	0.00073086
WA 200	1	0	0.988644	0.00267674	0.9826	0	0.994315	0.00073086
WA 800	1	0	0.988013	0.000892248	0.9826	0.0011839	0.985013	0.00146172
WAS 0	1	0	0.991798	0.00496783	0.9797	0.0011839	0.993798	0.00334922
WAS 200	1	0	0.991798	0.00496783	0.9797	0.0011839	0.993798	0.00334922
WAS 800	1	0	0.984227	0.00356899	0.97245	0.0051605	0.993282	0.00073086

## Sheet: EC and pH data.
		pH	SD	DI 7.9			pH	SD	DI 7.9			pH	SD	DI 7.9		pH	SD	DI 7.9
Sample	mL	WA		delta pH		WAS		delta pH		WAGr		delta pH		WASGr		delta pH
1	25	9.32333	0.156276	1.42333		8.86333	0.111455	0.963333		8.7	0.294392	0.8		8.51333	0.196695	0.613333
2	50	10.2933	0.239768	2.39333		9.34	0.502858	1.44		9.53333	0.518545	1.63333		9.47667	0.500755	1.57667
3	75	10.54	0.280832	2.64		9.64667	0.337672	1.74667		10.1	0.216025	2.2		10.0033	0.28686	2.10333
4	100	10.6233	0.233286	2.72333		9.89333	0.341988	1.99333		10.1	0.216025	2.2		10.1467	0.387241	2.24667
5	125	10.6567	0.284292	2.75667		9.95	0.401082	2.05		10.1	0.216025	2.2		10.3433	0.341207	2.44333
6	150	10.7833	0.139124	2.88333		10.275	0.275	2.375		10.1333	0.124722	2.23333		10.29	0.364783	2.39
7	175	10.7333	0.204342	2.83333		10.1133	0.41644	2.21333		10.1667	0.0471405	2.26667		10.2567	0.339935	2.35667
8	200	10.8367	0.132749	2.93667		9.6919	0.100889	1.7919		10.1667	0.124722	2.26667		10.2633	0.437442	2.36333
9	225	10.82	0.149666	2.92		9.5019	0.868396	1.6019		10.2333	0.0471405	2.33333		10.1233	0.533687	2.22333
10	250	10.8633	0.106562	2.96333		10.1219	0.206508	2.2219		10.0667	0.0471405	2.16667		9.87667	0.817897	1.97667
11	275	10.8667	0.0974109	2.96667		10.0186	0.221046	2.11857		9.7	0.571548	1.8		9.92	0.843129	2.02
12	300	10.8433	0.102089	2.94333		10.3652	0.297318	2.46524		9.86667	0.339935	1.96667		9.84667	0.898047	1.94667
13	325	10.8167	0.0793025	2.91667		10.2952	0.304627	2.39524		9.9	0.294392	2		9.87333	0.754822	1.97333
14	350	10.7633	0.15107	2.86333		9.8319	0.827692	1.9319		9.73333	0.0942809	1.83333		9.99333	0.684706	2.09333
15	375	10.8167	0.0953357	2.91667		10.2519	0.0873287	2.3519		9.33333	0.329983	1.43333		9.95	0.842655	2.05
16	400	10.8167	0.0555778	2.91667		10.1419	0.284249	2.2419		9.6	0.294392	1.7		9.90333	0.858578	2.00333
17	500	10.7867	0.234426	2.88667		9.8219	0.589251	1.9219		10.2667	0.262467	2.36667		10.27	0.248328	2.37
18	600	10.7	0.171464	2.8		9.93524	0.506846	2.03524		9.93333	0.590668	2.03333		10.3167	0.167398	2.41667
19	700	10.58	0.318852	2.68		9.83857	0.499756	1.93857		9.56667	0.46428	1.66667		10.34	0.106771	2.44
20	800	10.6167	0.224252	2.71667		9.30524	0.705116	1.40524		9.4	0.648074	1.5		9.76	0.679412	1.86
Sample	EC (microsiemens)	mL	pH		Sample	EC (microsiemens)	mL	pH		Sample	EC (microsiemens)	mL	pH
1WA0	17790	25	9.48		2WA0	9680	25	9.11		3WA0	12200	25	9.38
1WA1	1069	25	10.61		2WA1	4550	25	10.03		3WA1	3150	25	10.24
1WA2	479	25	10.92		2WA2	2000	25	10.25		3WA2	1596	25	10.45
1WA3	339	25	10.95		2WA3	820	25	10.42		3WA3	1051	25	10.5
1WA4	260	25	11.04		2WA4	471	25	10.36		3WA4	663	25	10.57
1WA5	223	25	10.98		2WA5	335	25	10.68		3WA5	472	25	10.69
1WA6	187	25	10.99		2WA6	259	25	10.49		3WA6	363	25	10.72
1WA7	170	25	11.02		2WA7	225	25	10.71		3WA7	293	25	10.78
1WA8	147	25	11.02		2WA8	199	25	10.66		3WA8	250	25	10.78
1WA9	143	25	11.01		2WA9	184	25	10.76		3WA9	212	25	10.82
1WA10	134	25	11		2WA10	160	25	10.77		3WA10	192	25	10.83
1WA11	123	25	10.97		2WA11	152	25	10.72		3WA11	170	25	10.84
1WA12	116	25	10.9		2WA12	143	25	10.71		3WA12	159	25	10.84
1WA13	114	25	10.95		2WA13	131	25	10.58		3WA13	146	25	10.76
1WA14	105	25	10.92		2WA14	125	25	10.69		3WA14	135	25	10.84
1WA15	104	25	10.87		2WA15	124	25	10.74		3WA15	127	25	10.84
1WA16	88	100	11.03		2WA16	101	100	10.47		3WA16	109	100	10.86
1WA17	77	100	10.85		2WA17	91	100	10.46		3WA17	93	100	10.79
1WA18	70	100	10.78		2WA18	80	100	10.13		3WA18	87	100	10.83
1WA19	63	100	10.7		2WA19	71	100	10.31		3WA19	69	100	10.84
Sample	EC (microsiemens)	mL	pH		Sample	EC (microsiemens)	mL	pH		Sample	EC (microsiemens)	mL	pH
1WASNG0	7940	25	9.02		2WASNG0	9860	25	8.77		3WASNG0	5290	25	8.8
1WASNG1	3610	25	10.05		2WASNG1	3940	25	9.02		3WASNG1	5710	25	8.95
1WASNG2	1750	25	10.1		2WASNG2	1530	25	9.55		3WASNG2	3340	25	9.29
1WASNG3	1030	25	10.36		2WASNG3	850	25	9.55		3WASNG3	1640	25	9.77
1WASNG4	656	25	10.48		2WASNG4	567	25	9.51		3WASNG4	1000	25	9.86
1WASNG5	428	25	10.55		2WASNG5		25			3WASNG5	616	25	10
1WASNG6	315	25	10.62		2WASNG6	427	25	9.6		3WASNG6	399	25	10.12
1WASNG7	248	25	9.77571		2WASNG7	364	25	9.55		3WASNG7	322	25	9.75
1WASNG8	231	25	9.93571		2WASNG8	289	25	8.29		3WASNG8	260	25	10.28
1WASNG9	184	25	10.2757		2WASNG9	235	25	9.83		3WASNG9	218	25	10.26
1WASNG10	153	25	9.99571		2WASNG10	208	25	9.76		3WASNG10	194	25	10.3
1WASNG11	133	25	10.7457		2WASNG11	185	25	10.02		3WASNG11	174	25	10.33
1WASNG12	118	25	10.6757		2WASNG12	166	25	9.93		3WASNG12	148	25	10.28
1WASNG13	110	25	10.5357		2WASNG13	146	25	8.67		3WASNG13	142	25	10.29
1WASNG14	97	25	10.2957		2WASNG14	135	25	10.13		3WASNG14	130	25	10.33
1WASNG15	97	25	10.1957		2WASNG15	126	25	9.77		3WASNG15	122	25	10.46
1WASNG16	81	100	10.1957		2WASNG16	103	100	8.99		3WASNG16	100	100	10.28
1WASNG17	71	100	10.0957		2WASNG17	86	100	9.25		3WASNG17	85	100	10.46
1WASNG18	64	100	9.94571		2WASNG18	75	100	9.18		3WASNG18	75	100	10.39
1WASNG19	59	100	10.2957		2WASNG19	67	100	8.91		3WASNG19	68	100	8.71
Sample	EC (microsiemens)	mL	pH		Sample	EC (microsiemens)	mL	pH		Sample	EC (microsiemens)	mL	pH
1WAGr0	12200	25	9		2WAGr0	14400	25	8.8		3WAGr0	14500	25	8.3
1WAGr1	1170	25	9.9		2WAGr1	1632	25	9.9		3WAGr1	1765	25	8.8
1WAGr2	595	25	10.2		2WAGr2	756	25	10.3		3WAGr2	827	25	9.8
1WAGr3	401	25	10.2		2WAGr3	450	25	10.3		3WAGr3	489	25	9.8
1WAGr4	310	25	10.2		2WAGr4	376	25	10.3		3WAGr4	390	25	9.8
1WAGr5	310	25	10.1		2WAGr5	310	25	10.3		3WAGr5	336	25	10
1WAGr6	288	25	10.2		2WAGr6	263	25	10.1		3WAGr6	281	25	10.2
1WAGr7	251	25	10.2		2WAGr7	237	25	10.3		3WAGr7	219	25	10
1WAGr8	209	25	10.2		2WAGr8	191	25	10.3		3WAGr8	218	25	10.2
1WAGr9	186	25	10.1		2WAGr9	174	25	10.1		3WAGr9	200	25	10
1WAGr10	191	25	10.2		2WAGr10	158	25	10		3WAGr10	179	25	8.9
1WAGr11	160	25	10.2		2WAGr11	166	25	10		3WAGr11	166	25	9.4
1WAGr12	143	25	10.2		2WAGr12	158	25	10		3WAGr12	152	25	9.5
1WAGr13	87	25	9.8		2WAGr13	161	25	9.8		3WAGr13	124	25	9.6
1WAGr14	93	25	8.9		2WAGr14	140	25	9.7		3WAGr14	118	25	9.4
1WAGr15	94	25	9.3		2WAGr15	121	25	10		3WAGr15	122	25	9.5
1WAGr16	99	100	9.9		2WAGr16	100	100	10.5		3WAGr16	106	100	10.4
1WAGr17	94	100	9.1		2WAGr17	106	100	10.3		3WAGr17	91	100	10.4
1WAGr18	85	100	9.1		2WAGr18	80	100	9.4		3WAGr18	90	100	10.2
1WAGr19	72	100	9.1		2WAGr19	74	100	8.8		3WAGr19	80	100	10.3
Sample	EC (microsiemens)	mL	pH		Sample	EC (microsiemens)	mL	pH		Sample	EC (microsiemens)	mL	pH
1WASDRY0	16640	25	8.35		2DRYWAS0	14140	25	8.4		3WASDRY0	15950	25	8.79
1WASDRY1	1870	25	8.79		2DRYWAS1	1420	25	9.67		3WASDRY1	1156	25	9.97
1WASDRY2	931	25	9.62		2DRYWAS2	494	25	10.08		3WASDRY2	549	25	10.31
1WASDRY3	706	25	9.62		2DRYWAS3	339	25	10.28		3WASDRY3	392	25	10.54
1WASDRY4	470	25	9.9		2DRYWAS4	275	25	10.4		3WASDRY4	268	25	10.73
1WASDRY5	340	25	9.79		2DRYWAS5	223	25	10.43		3WASDRY5	256	25	10.65
1WASDRY6	275	25	9.79		2DRYWAS6	223	25	10.39		3WASDRY6	215	25	10.59
1WASDRY7	226	25	9.65		2DRYWAS7	169	25	10.5		3WASDRY7	201	25	10.64
1WASDRY8	212	25	9.37		2DRYWAS8	163	25	10.54		3WASDRY8	184	25	10.46
1WASDRY9	205	25	8.72		2DRYWAS9	134	25	10.46		3WASDRY9	170	25	10.45
1WASDRY10	197	25	8.73		2DRYWAS10	134	25	10.45		3WASDRY10	148	25	10.58
1WASDRY11	198	25	8.58		2DRYWAS11	126	25	10.4		3WASDRY11	148	25	10.56
1WASDRY12	164	25	8.82		2DRYWAS12	118	25	10.25		3WASDRY12	141	25	10.55
1WASDRY13	157	25	9.03		2DRYWAS13	112	25	10.39		3WASDRY13	131	25	10.56
1WASDRY14	151	25	8.76		2DRYWAS14	109	25	10.49		3WASDRY14	123	25	10.6
1WASDRY15	157	25	8.69		2DRYWAS15	101	25	10.47		3WASDRY15	109	25	10.55
1WASDRY16	117	100	9.92		2DRYWAS16	91	100	10.42		3WASDRY16	109	100	10.47
1WASDRY17	103	100	10.08		2DRYWAS17	81	100	10.43		3WASDRY17	97	100	10.44
1WASDRY18	97	100	10.28		2DRYWAS18	68	100	10.25		3WASDRY18	79	100	10.49
1WASDRY19	76	100	8.84		2DRYWAS19	67	100	9.98		3WASDRY19	77	100	10.46

## Sheet: XRD data
	Biochar sintered with wood ash	Biochar mixed cold with wood ash
10.0001	22.5417	17.4167
10.0197	22.6146	17.0208
10.0394	23.4688	17.2917
10.059	21.9688	16.5625
10.0786	21.5312	17.1354
10.0982	23.0938	17.4271
10.1179	21.9375	17.1354
10.1375	22.6042	17.7604
10.1571	22.6458	16.9375
10.1767	22.2292	17.25
10.1964	21.8542	17.4583
10.216	22.6667	17.6771
10.2356	23.2292	16.8542
10.2553	23.3438	18.1042
10.2749	23.8125	17.7708
10.2945	23.6146	16.6354
10.3141	22.7812	17.5312
10.3338	23.0312	17.4688
10.3534	22.8542	17.6146
10.373	22.8854	17.2604
10.3926	24.4271	17.2396
10.4123	22.5417	17.6979
10.4319	23.125	17.7188
10.4515	23.6042	16.9688
10.4711	23.5938	17.3333
10.4908	23.2396	16.9479
10.5104	24.0729	18.0833
10.53	23.7083	17.8125
10.5497	24.1562	17.5104
10.5693	23.9479	16.8542
10.5889	24.8854	17.1354
10.6085	24.1562	16.8125
10.6282	24.6354	17.0521
10.6478	23.9896	17.1562
10.6674	24.5521	18.1146
10.687	24.6875	18.2812
10.7067	24.6667	18.4688
10.7263	24.9062	18.4479
10.7459	24.9375	18.7396
10.7656	25.875	19.0521
10.7852	25.5208	19.2083
10.8048	24.7604	19.5
10.8244	25.125	18.5417
10.8441	24.2812	18.5417
10.8637	24.1562	18.1042
10.8833	24.125	18.7188
10.9029	24.3438	18.5
10.9226	23.3542	18.2188
10.9422	23.6042	18.0833
10.9618	24.5208	17.9271
10.9815	24.9062	18.0938
11.0011	24.8125	18.375
11.0207	25.0625	18.2083
11.0403	24.7083	17.0521
11.06	23.9062	17.5104
11.0796	24.0938	17.1667
11.0992	25.1979	17.6562
11.1188	24.5521	17.1354
11.1385	24.5417	17.7188
11.1581	24.3646	18.0417
11.1777	25.0729	17.6458
11.1973	26.0312	18.1667
11.217	24.5833	18.3438
11.2366	25.1667	17.9062
11.2562	24.6146	18.3333
11.2759	24.7917	18.0208
11.2955	24.9375	18.0521
11.3151	25.2917	19.0729
11.3347	24.7708	17.7708
11.3544	25.8229	17.5104
11.374	25.1458	17.7917
11.3936	25.7396	17.625
11.4132	25.7812	18.8438
11.4329	25.6458	17.9792
11.4525	25.1979	18.25
11.4721	25.1771	18.0521
11.4918	25.6771	18.0417
11.5114	25.2917	17.9479
11.531	25.2188	17.6354
11.5506	26.2188	17.7708
11.5703	25.5729	18.6667
11.5899	25.0312	18.2292
11.6095	25.4167	18.1771
11.6291	25.5208	18.9375
11.6488	25.0833	18.6562
11.6684	25.3229	18.4583
11.688	25.7812	17.6771
11.7076	25.6771	18.7083
11.7273	25.625	18.3333
11.7469	25.7083	17.7292
11.7665	26.1562	18.4479
11.7862	26.4375	18.9479
11.8058	24.5625	18.7604
11.8254	25.3229	19.1458
11.845	25.2083	18.5312
11.8647	25.8958	18.125
11.8843	26.1042	18.2292
11.9039	26.4062	18.375
11.9235	26.1979	18.3646
11.9432	25.4167	18.0729
11.9628	25.7604	17.6458
11.9824	25.2292	18.2188
12.0021	25.625	18.75
12.0217	26.1042	18.5521
12.0413	25.4375	19
12.0609	26.0521	18.625
12.0806	25.8542	18.9792
12.1002	26.0625	18.7708
12.1198	26.6979	18.4479
12.1394	26.3958	18.2396
12.1591	26.3542	17.8333
12.1787	25.4375	18.8333
12.1983	25.9271	17.6146
12.218	26.1458	19.0729
12.2376	25.5208	17.4583
12.2572	26.3438	17.5938
12.2768	26.7917	18.9375
12.2965	26.3542	18.1458
12.3161	25.8958	18.6146
12.3357	25.2292	18.6146
12.3553	27.0521	17.4062
12.375	26.2708	18.1667
12.3946	26.0208	18.1667
12.4142	25.5312	18.1667
12.4338	25.625	18.5
12.4535	25.3438	18.5
12.4731	25.9375	18.3542
12.4927	25.8542	17.5208
12.5124	26.2292	18.0208
12.532	25.6042	18.3958
12.5516	26.0729	19.2188
12.5712	25.6667	18.2396
12.5909	25.2708	18.0521
12.6105	25.3854	17.9688
12.6301	25.1667	17.4583
12.6497	25.3542	18.3854
12.6694	26.0521	18.6354
12.689	25.6771	18.1458
12.7086	25.1458	18.1354
12.7283	25.4375	19.375
12.7479	25.4167	18.3542
12.7675	25.2812	18.6354
12.7871	25.4583	17.4688
12.8068	25.6562	17.4896
12.8264	25.1771	17.6979
12.846	24.5417	17.8646
12.8656	24.4688	17.5938
12.8853	25.5417	17.5729
12.9049	23.8021	17.6146
12.9245	25.3125	17.9375
12.9442	25.2917	18.1979
12.9638	24.9479	16.7917
12.9834	25.75	17.4375
13.003	24.2812	18.1667
13.0227	25.9271	18.0104
13.0423	25.1458	16.8958
13.0619	24.9062	17.0625
13.0815	23.6771	17.0521
13.1012	24.1667	18.1667
13.1208	25.9896	16.7083
13.1404	24.2292	17.7812
13.16	23.375	17.5
13.1797	24.1354	17.0521
13.1993	24.4062	17.6562
13.2189	23.7604	17.4062
13.2386	24.1771	17.2708
13.2582	23.3438	16.625
13.2778	23.9583	16.8854
13.2974	23.7083	16.9896
13.3171	24.8646	17.0729
13.3367	24.7396	17
13.3563	24.4062	17.0938
13.3759	23.9688	18.125
13.3956	23.3542	16.875
13.4152	22.9583	16.7812
13.4348	23.7812	17.1771
13.4545	22.8125	17.0521
13.4741	23.9688	16
13.4937	23.7188	16.9479
13.5133	22.7708	17.0833
13.533	23.5417	17.1146
13.5526	23.7396	16.5312
13.5722	23.3125	15.7083
13.5918	23.6146	16.5938
13.6115	23.3021	16.0521
13.6311	24.625	16.5625
13.6507	23.9062	16.1667
13.6704	23.6146	17.5417
13.69	24.0625	16.7604
13.7096	23.2604	17.5938
13.7292	23.8854	16.1667
13.7489	23.3646	17.8542
13.7685	23.1771	17.125
13.7881	21.9688	16.9896
13.8077	23.0521	17.3438
13.8274	22.4167	16.3542
13.847	22.5104	16.2292
13.8666	20.7917	16.3229
13.8862	22.1354	15.7604
13.9059	22.0938	15.2917
13.9255	21.25	16.1042
13.9451	21.7604	15.5521
13.9648	21.6771	15.4479
13.9844	21.0417	15.1771
14.004	21.25	15.3958
14.0236	20.7812	15.0625
14.0433	21.2604	14.5833
14.0629	20.9896	15.1667
14.0825	21.6458	14.8229
14.1021	20.5521	14.75
14.1218	20.3542	14.9375
14.1414	21.1458	14.2083
14.161	20.7292	15.0938
14.1807	20.3958	15.6042
14.2003	20.9271	15.0625
14.2199	19.9479	14.7292
14.2395	20.1771	13.7708
14.2592	19.8854	14.3854
14.2788	21.5312	14.4062
14.2984	20.4375	14.0417
14.318	21.1042	14.2708
14.3377	20.5417	14.5729
14.3573	19.9792	14.3646
14.3769	20.0208	14.1354
14.3965	20.3542	13.5729
14.4162	20.2083	13.7292
14.4358	19.9583	14.1458
14.4554	19.5417	14.1979
14.4751	19.0729	12.8438
14.4947	19.8229	13.6979
14.5143	19.3125	13.7292
14.5339	19.1667	13.2604
14.5536	18.625	13.7083
14.5732	18.7604	13.8125
14.5928	19.4792	13.5208
14.6124	19.3542	13.4688
14.6321	19.3021	13.3125
14.6517	18.6562	13.6146
14.6713	18.0417	13.3958
14.691	18.625	13.2917
14.7106	19.375	12.8333
14.7302	18.9688	13.0521
14.7498	18.0729	11.8229
14.7695	18.2396	12.8646
14.7891	18.1562	13.125
14.8087	18.9688	12.5521
14.8283	18.8854	12.4062
14.848	17.8854	12.9271
14.8676	18.3333	12.4896
14.8872	17.9479	12.5312
14.9069	17.4479	12.5833
14.9265	17.3229	12.1771
14.9461	18.4375	12.5104
14.9657	18.4583	11.6771
14.9854	17.9896	12.9375
15.005	17.6458	12.2396
15.0246	17.3438	12.6458
15.0442	17.3646	12.1042
15.0639	17.8125	11.8125
15.0835	17.0417	12
15.1031	17.125	12.6042
15.1227	16.9167	11.3542
15.1424	16.8125	11.3021
15.162	16.5938	11.5833
15.1816	17.1354	11.7708
15.2013	16.5729	11.5938
15.2209	16.4583	11.9479
15.2405	16.6562	11.9167
15.2601	16.6354	11.7708
15.2798	16.4062	11.2604
15.2994	16.1667	11.3958
15.319	16.0104	11.6667
15.3386	16.2708	11.5417
15.3583	15.6354	11.3958
15.3779	15.9062	11.9271
15.3975	15.8646	11.2396
15.4172	15.7604	11.125
15.4368	16.25	10.7083
15.4564	16	11.75
15.476	16.8646	10.9792
15.4957	15.2396	11.3854
15.5153	15.5521	11.5625
15.5349	15.8646	10.4688
15.5545	14.6979	11.1042
15.5742	16.2396	10.375
15.5938	15.0417	10.5729
15.6134	15.875	10.9479
15.6331	14.6979	11.2708
15.6527	15.3021	10.6458
15.6723	14.7604	10.6354
15.6919	15.5208	10.3438
15.7116	15.1979	10.3333
15.7312	14.8021	10.6979
15.7508	14.4062	10.2083
15.7704	14.6042	10.2708
15.7901	14.6875	9.86458
15.8097	14.6354	9.5
15.8293	14.7083	10.2083
15.8489	15.1146	10.3542
15.8686	14.5833	10.4896
15.8882	14.1875	10.3125
15.9078	14.9583	10.3542
15.9275	14.8333	10.1667
15.9471	14.4167	10.1354
15.9667	13.7083	10.4479
15.9863	13.8333	9.73958
16.006	14.1042	9.36458
16.0256	14.2812	9.82292
16.0452	14.4167	9.98958
16.0648	13.6875	9.76042
16.0845	13.5417	9.39583
16.1041	14.0208	10.2292
16.1237	13.3333	9.34375
16.1434	13.5208	9.34375
16.163	13.4375	9.32292
16.1826	13.25	9.27083
16.2022	13.8021	9.28125
16.2219	12.9688	9.17708
16.2415	13.0938	8.9375
16.2611	12.4167	9.1875
16.2807	12.5104	8.33333
16.3004	13.3542	9.76042
16.32	12.4062	9.33333
16.3396	12.5208	8.90625
16.3593	12.4896	8.95833
16.3789	12.5	8.88542
16.3985	12.125	9.65625
16.4181	12.7917	8.90625
16.4378	12.6146	8.5
16.4574	12.4271	9.05208
16.477	12.0208	8.76042
16.4966	12.4479	8.73958
16.5163	12.2917	8.51042
16.5359	11.9479	8.51042
16.5555	11.8333	8.44792
16.5751	11.4688	8.71875
16.5948	11.8646	8.75
16.6144	11.4167	8.375
16.634	11.3021	8.35417
16.6537	12.3958	8.34375
16.6733	11.9896	8.44792
16.6929	12.0208	8.33333
16.7125	11.7812	8.52083
16.7322	11.4479	8.63542
16.7518	12.0312	9.13542
16.7714	11.3958	8.83333
16.791	11.4896	8.76042
16.8107	12.1146	8.5625
16.8303	11.1354	8.23958
16.8499	11.1042	8.01042
16.8696	10.6562	7.91667
16.8892	11.1146	7.84375
16.9088	10.8125	7.84375
16.9284	11.3854	8.20833
16.9481	10.3125	7.77083
16.9677	10.3125	7.66667
16.9873	11.2708	8.03125
17.0069	11.4479	8.36458
17.0266	10.8438	8.11458
17.0462	10.9375	8.1875
17.0658	10.1458	8.19792
17.0854	10.5417	8.36458
17.1051	10.5104	7.48958
17.1247	10.4583	7.55208
17.1443	10.0521	7.39583
17.164	10.4688	7.40625
17.1836	10.1458	7.375
17.2032	9.9375	7.4375
17.2228	9.36458	7.19792
17.2425	10.0417	7.11458
17.2621	10.1458	7.57292
17.2817	9.875	7.23958
17.3013	9.21875	7.64583
17.321	10.125	7.55208
17.3406	9.20833	7.39583
17.3602	9.53125	7.13542
17.3799	9.86458	6.97917
17.3995	9.27083	6.57292
17.4191	9.36458	7.44792
17.4387	9.15625	6.80208
17.4584	9.55208	7.34375
17.478	9.0625	7.04167
17.4976	9.10417	7.01042
17.5172	9.03125	7.09375
17.5369	8.85417	6.61458
17.5565	9.125	6.875
17.5761	8.59375	6.69792
17.5958	8.33333	6.51042
17.6154	8.19792	6.61458
17.635	9.23958	7.10417
17.6546	8.6875	6.45833
17.6743	8.61458	6.5
17.6939	9.15625	6.13542
17.7135	8.34375	6.44792
17.7331	8.57292	6.75
17.7528	8.19792	6.41667
17.7724	8.6875	6.90625
17.792	8.28125	6.55208
17.8116	8.65625	6.04167
17.8313	8.42708	6.5
17.8509	8.3125	6.35417
17.8705	8.42708	6.07292
17.8902	8.55208	6.45833
17.9098	8.71875	6.30208
17.9294	8.13542	6.39583
17.949	8.63542	6.625
17.9687	8.07292	6.22917
17.9883	7.6875	6.59375
18.0079	8.375	6.17708
18.0275	7.98958	6.21875
18.0472	7.83333	6.34375
18.0668	7.09375	6.26042
18.0864	7.79167	5.97917
18.1061	7.5625	5.70833
18.1257	7.625	5.91667
18.1453	7.35417	6.21875
18.1649	8.14583	5.88542
18.1846	7.47917	5.77083
18.2042	7.76042	5.95833
18.2238	7.39583	5.67708
18.2434	7.39583	6.05208
18.2631	7.53125	6.09375
18.2827	7.44792	5.92708
18.3023	8.22917	6.09375
18.322	7.80208	6.14583
18.3416	7.03125	6.1875
18.3612	7.45833	5.86458
18.3808	7.75	6.10417
18.4005	7.47917	6.27083
18.4201	7.54167	6.03125
18.4397	7.97917	6.15625
18.4593	7.88542	6.02083
18.479	8.47917	5.98958
18.4986	8.29167	6.23958
18.5182	8.52083	6.5
18.5378	8.51042	7.0625
18.5575	8.52083	7.30208
18.5771	8.53125	7.875
18.5967	8.9375	8.36458
18.6164	8.5	7.84375
18.636	7.65625	7.13542
18.6556	7.27083	7.6875
18.6752	7.71875	7.17708
18.6949	7.98958	6.39583
18.7145	7.3125	6.76042
18.7341	6.95833	6.5625
18.7537	6.89583	6.63542
18.7734	6.9375	6.15625
18.793	6.80208	5.88542
18.8126	6.09375	6.53125
18.8323	6.73958	5.78125
18.8519	6.625	5.60417
18.8715	6.61458	5.82292
18.8911	6.375	5.5625
18.9108	6.15625	5.375
18.9304	6.54167	6.01042
18.95	6.04167	5.8125
18.9696	5.94792	5.41667
18.9893	5.89583	5.29167
19.0089	5.9375	6
19.0285	6.5	5.34375
19.0482	6.15625	5.20833
19.0678	5.9375	5.3125
19.0874	6.25	5.40625
19.107	5.86458	5.4375
19.1267	6.34375	5.45833
19.1463	6.34375	4.92708
19.1659	5.71875	5.21875
19.1855	5.91667	5.03125
19.2052	5.72917	5.3125
19.2248	5.78125	5.27083
19.2444	5.64583	5.10417
19.264	5.78125	5.35417
19.2837	5.82292	4.5
19.3033	5.89583	4.80208
19.3229	5.19792	4.96875
19.3426	6.01042	4.97917
19.3622	5.78125	4.84375
19.3818	5.5625	5.29167
19.4014	5.61458	4.8125
19.4211	5.58333	5.01042
19.4407	5.41667	4.77083
19.4603	5.61458	5
19.4799	5.86458	4.88542
19.4996	5.71875	4.86458
19.5192	5.61458	5.45833
19.5388	6	4.75
19.5585	5.90625	4.76042
19.5781	5.15625	4.76042
19.5977	5.09375	5.10417
19.6173	5.34375	4.84375
19.637	5.34375	5.11458
19.6566	6.17708	4.97917
19.6762	5.35417	5.09375
19.6958	5.51042	5.01042
19.7155	5.89583	4.84375
19.7351	5.39583	4.95833
19.7547	5.17708	5.11458
19.7743	4.59375	4.40625
19.794	5.20833	4.59375
19.8136	5.0625	4.60417
19.8332	5.16667	5
19.8529	5.40625	4.90625
19.8725	5.20833	4.6875
19.8921	4.88542	4.66667
19.9117	5.27083	4.71875
19.9314	5.36458	4.94792
19.951	5.17708	4.76042
19.9706	5.22917	4.55208
19.9902	4.91667	4.73958
20.0099	5.08333	4.98958
20.0295	5.28125	4.67708
20.0491	5.625	4.71875
20.0688	4.86458	5.13542
20.0884	5.28125	4.36458
20.108	5.54167	5.05208
20.1276	5.01042	4.6875
20.1473	5.1875	4.78125
20.1669	5.29167	4.91667
20.1865	5.5	4.75
20.2061	4.82292	4.83333
20.2258	5.66667	4.76042
20.2454	5.07292	4.78125
20.265	4.88542	4.5625
20.2847	5.4375	4.4375
20.3043	5.36458	4.9375
20.3239	5.05208	4.77083
20.3435	4.92708	5.13542
20.3632	4.90625	4.70833
20.3828	5.26042	4.57292
20.4024	5.26042	4.45833
20.422	4.86458	4.54167
20.4417	4.80208	4.73958
20.4613	5.09375	4.73958
20.4809	4.625	4.3125
20.5005	4.9375	4.60417
20.5202	5.125	4.125
20.5398	5.14583	4.3125
20.5594	5.02083	4.44792
20.5791	5.01042	4.16667
20.5987	4.25	4.28125
20.6183	4.70833	4.45833
20.6379	4.83333	4.375
20.6576	5.29167	4.375
20.6772	4.86458	4.26042
20.6968	5.47917	4.32292
20.7164	5.92708	4.90625
20.7361	5.66667	5
20.7557	6.0625	4.41667
20.7753	5.71875	4.80208
20.795	5.45833	4.8125
20.8146	5.35417	4.51042
20.8342	5.59375	4.14583
20.8538	5.16667	4.63542
20.8735	5.10417	4.72917
20.8931	5.04167	4.21875
20.9127	4.67708	4.41667
20.9323	5.47917	4.9375
20.952	5.625	4.8125
20.9716	5.48958	4.29167
20.9912	6.05208	5.13542
21.0109	5.77083	4.64583
21.0305	6.15625	5.14583
21.0501	5.6875	5.4375
21.0697	5.82292	5.60417
21.0894	5.64583	5.66667
21.109	5.30208	5.33333
21.1286	5.29167	5.86458
21.1482	4.55208	5.25
21.1679	4.61458	4.54167
21.1875	4.88542	4.76042
21.2071	4.69792	4.60417
21.2267	4.8125	4.84375
21.2464	4.1875	4.40625
21.266	4.26042	4.13542
21.2856	4.83333	4.55208
21.3053	4.32292	4.05208
21.3249	4.11458	4.25
21.3445	4.70833	3.75
21.3641	4.20833	4.67708
21.3838	4.33333	3.875
21.4034	4.65625	4.11458
21.423	4.5	3.90625
21.4426	4.29167	3.78125
21.4623	4.63542	4.69792
21.4819	4.48958	4.09375
21.5015	4.9375	4.0625
21.5212	4.3125	4.58333
21.5408	4.95833	4.39583
21.5604	5.375	4.6875
21.58	5.48958	4.25
21.5997	5.84375	4.65625
21.6193	6.41667	4.33333
21.6389	5.89583	5.09375
21.6585	6.15625	5.13542
21.6782	6.17708	5.55208
21.6978	5.88542	5.60417
21.7174	5.45833	5.53125
21.7371	5.21875	5.3125
21.7567	4.58333	5.51042
21.7763	4.73958	4.85417
21.7959	4.67708	4.64583
21.8156	4.77083	4.375
21.8352	4.82292	4.53125
21.8548	4.5625	4.38542
21.8744	4.42708	3.98958
21.8941	4.73958	4.27083
21.9137	4.63542	4.1875
21.9333	4.23958	4.44792
21.9529	4.22917	4.375
21.9726	4.67708	4.5625
21.9922	4.59375	4.42708
22.0118	4.65625	4.28125
22.0315	4.33333	4.05208
22.0511	4.13542	4.20833
22.0707	4.39583	4.125
22.0903	4.21875	4.19792
22.11	4.30208	4.15625
22.1296	4.16667	3.91667
22.1492	3.6875	3.94792
22.1688	4.73958	3.96875
22.1885	4.25	3.92708
22.2081	4.09375	4.05208
22.2277	3.8125	4
22.2474	4.10417	4.04167
22.267	4.30208	4.03125
22.2866	4.36458	3.375
22.3062	4.51042	4.16667
22.3259	4.10417	4.16667
22.3455	4.55208	4.11458
22.3651	3.83333	3.73958
22.3847	3.96875	3.92708
22.4044	4.34375	3.97917
22.424	4.36458	3.97917
22.4436	4.08333	4.08333
22.4632	3.76042	3.96875
22.4829	4.40625	4.08333
22.5025	4.64583	4.17708
22.5221	4.25	4.0625
22.5418	4.21875	4.19792
22.5614	4.0625	4.15625
22.581	4.375	3.91667
22.6006	4.85417	4.35417
22.6203	4.71875	4.08333
22.6399	4.71875	4.52083
22.6595	4.94792	4.5625
22.6791	5.71875	4.39583
22.6988	5.97917	4.36458
22.7184	5.92708	4.71875
22.738	6.3125	4.94792
22.7577	6.0625	4.86458
22.7773	6.63542	5.66667
22.7969	6.16667	5.5625
22.8165	6.52083	6.15625
22.8362	6.4375	6.05208
22.8558	7.09375	6
22.8754	6.875	5.8125
22.895	6.76042	6.45833
22.9147	6.95833	5.98958
22.9343	7.16667	6.30208
22.9539	7.01042	6.55208
22.9736	7.15625	6.80208
22.9932	6.96875	6.97917
23.0128	5.84375	7.44792
23.0324	6.0625	6.9375
23.0521	5.73958	6.89583
23.0717	5.0625	6.25
23.0913	5.25	5.76042
23.1109	4.95833	5.3125
23.1306	4.75	4.47917
23.1502	4.60417	4.79167
23.1698	5.20833	4.69792
23.1894	4.39583	4.72917
23.2091	4.58333	4.72917
23.2287	4.625	4.57292
23.2483	4.53125	3.95833
23.268	4.90625	4.33333
23.2876	4.46875	4.14583
23.3072	4.40625	3.83333
23.3268	4.38542	3.5625
23.3465	4.47917	3.79167
23.3661	4.21875	3.625
23.3857	4.28125	3.91667
23.4053	4.46875	3.84375
23.425	4.3125	3.91667
23.4446	4.38542	3.9375
23.4642	4.28125	4.10417
23.4839	4.28125	3.82292
23.5035	3.91667	4.20833
23.5231	4.3125	3.86458
23.5427	4.125	3.70833
23.5624	4.04167	3.63542
23.582	4.27083	4.10417
23.6016	4.36458	3.97917
23.6212	3.88542	3.94792
23.6409	3.83333	4.11458
23.6605	3.875	3.90625
23.6801	4.0625	3.64583
23.6998	4.17708	4.29167
23.7194	4.14583	3.8125
23.739	4.33333	4.09375
23.7586	4.05208	3.63542
23.7783	4.58333	3.52083
23.7979	4.95833	4.17708
23.8175	4.83333	4.20833
23.8371	4.84375	4.27083
23.8568	5.19792	4.41667
23.8764	5.46875	4.39583
23.896	6.35417	4.47917
23.9156	7.04167	5.09375
23.9353	6.25	5.1875
23.9549	6.08333	5.71875
23.9745	5.77083	6.46875
23.9942	5.71875	6.25
24.0138	4.97917	6.0625
24.0334	4.52083	5.67708
24.053	4.625	5.22917
24.0727	4.46875	4.70833
24.0923	4.65625	4.46875
24.1119	4.72917	4.38542
24.1315	4.15625	4.45833
24.1512	4.875	4.19792
24.1708	5.04167	4.26042
24.1904	4.9375	4.58333
24.2101	4.70833	4.3125
24.2297	4.64583	4.54167
24.2493	4.875	4.30208
24.2689	4.5625	4.48958
24.2886	4.36458	4.54167
24.3082	4.23958	4.34375
24.3278	3.79167	4.3125
24.3474	3.89583	4.16667
24.3671	4.0625	4.0625
24.3867	3.88542	4.15625
24.4063	4.05208	4.10417
24.426	3.92708	3.61458
24.4456	4.125	3.6875
24.4652	4.01042	3.9375
24.4848	4.13542	3.82292
24.5045	4.375	3.82292
24.5241	4.1875	3.82292
24.5437	4.36458	3.89583
24.5633	3.92708	3.82292
24.583	4.5	4.15625
24.6026	4.04167	3.625
24.6222	3.65625	3.65625
24.6418	3.53125	3.8125
24.6615	3.88542	3.71875
24.6811	3.875	3.78125
24.7007	3.78125	3.72917
24.7204	4.02083	3.55208
24.74	3.53125	3.80208
24.7596	3.80208	3.29167
24.7792	3.91667	3.73958
24.7989	3.98958	3.82292
24.8185	4.07292	3.625
24.8381	3.95833	3.79167
24.8577	3.69792	3.44792
24.8774	4.21875	3.89583
24.897	4.19792	3.60417
24.9166	3.97917	3.52083
24.9363	3.48958	3.72917
24.9559	3.57292	3.54167
24.9755	3.63542	3.85417
24.9951	3.36458	3.48958
25.0148	3.63542	3.52083
25.0344	3.71875	3.75
25.054	3.94792	3.39583
25.0736	4.13542	3.76042
25.0933	4.1875	3.625
25.1129	3.73958	3.54167
25.1325	3.91667	3.86458
25.1521	3.6875	3.53125
25.1718	3.97917	3.35417
25.1914	4.08333	3.69792
25.211	4.125	3.92708
25.2307	4.15625	3.71875
25.2503	4.13542	3.69792
25.2699	3.96875	3.67708
25.2895	4.0625	4.01042
25.3092	4.29167	3.91667
25.3288	3.95833	4.15625
25.3484	4.32292	3.98958
25.368	3.84375	3.5625
25.3877	3.97917	3.94792
25.4073	3.94792	3.77083
25.4269	3.98958	3.86458
25.4466	3.40625	3.88542
25.4662	4.01042	3.94792
25.4858	3.96875	3.33333
25.5054	3.97917	3.55208
25.5251	4.10417	3.51042
25.5447	4.13542	4.40625
25.5643	4.51042	4.05208
25.5839	4.58333	3.98958
25.6036	5.04167	4
25.6232	5.41667	3.97917
25.6428	5.5625	4.55208
25.6625	6.14583	4.60417
25.6821	6.71875	4.95833
25.7017	6.9375	5.29167
25.7213	7.5625	5.66667
25.741	8.58333	6.53125
25.7606	8.5625	6.97917
25.7802	8.85417	7.51042
25.7998	8.67708	8.14583
25.8195	8.36458	8.36458
25.8391	8.3125	8.79167
25.8587	6.78125	9.15625
25.8783	6.54167	8.65625
25.898	5.70833	8.13542
25.9176	5.40625	7.41667
25.9372	5.4375	5.96875
25.9569	4.64583	5.55208
25.9765	4.59375	4.9375
25.9961	4.57292	4.55208
26.0157	4.125	4.54167
26.0354	3.875	4.09375
26.055	3.85417	4.17708
26.0746	3.79167	3.90625
26.0942	4.0625	4.0625
26.1139	3.6875	3.90625
26.1335	3.58333	3.875
26.1531	3.90625	3.86458
26.1728	3.69792	3.3125
26.1924	3.76042	3.89583
26.212	3.82292	3.65625
26.2316	3.92708	3.58333
26.2513	3.78125	3.45833
26.2709	3.6875	3.52083
26.2905	3.75	3.64583
26.3101	3.8125	3.86458
26.3298	3.77083	3.80208
26.3494	4.125	4.02083
26.369	4.125	3.79167
26.3887	3.95833	4.01042
26.4083	4.05208	3.64583
26.4279	4.71875	3.77083
26.4475	4.45833	3.98958
26.4672	4.6875	3.875
26.4868	4.92708	4.07292
26.5064	5.86458	4.38542
26.526	6.6875	4.59375
26.5457	7.83333	5.30208
26.5653	7.36458	4.77083
26.5849	5.69792	6.07292
26.6045	6.30208	7.21875
26.6242	5.16667	7.94792
26.6438	4.71875	7.6875
26.6634	4.125	6.67708
26.6831	4.01042	6.17708
26.7027	3.67708	5.71875
26.7223	3.89583	5.13542
26.7419	4.07292	4.5
26.7616	4	4.20833
26.7812	4.05208	4.29167
26.8008	4.26042	3.96875
26.8204	4.35417	4.0625
26.8401	3.95833	3.42708
26.8597	4.44792	4.08333
26.8793	4.40625	4.19792
26.899	4.65625	3.95833
26.9186	4.76042	3.72917
26.9382	4.96875	4.01042
26.9578	5.20833	4.15625
26.9775	5.89583	4.25
26.9971	6.3125	4.77083
27.0167	6.65625	4.95833
27.0363	7.52083	5.57292
27.056	7.91667	5.67708
27.0756	7.91667	6.91667
27.0952	7.11458	6.9375
27.1148	6.5	7.54167
27.1345	6.0625	7.94792
27.1541	6.03125	7.4375
27.1737	5.28125	6.85417
27.1934	4.82292	6.41667
27.213	4.54167	5.67708
27.2326	4.92708	4.69792
27.2522	5.33333	4.84375
27.2719	4.66667	4.5625
27.2915	4.625	4.52083
27.3111	4.59375	4.33333
27.3307	4.30208	3.78125
27.3504	3.89583	4.01042
27.37	3.9375	4.375
27.3896	3.77083	4.30208
27.4093	4.23958	4.15625
27.4289	3.625	4.29167
27.4485	3.45833	3.91667
27.4681	3.64583	3.66667
27.4878	3.64583	3.39583
27.5074	3.39583	3.6875
27.527	3.58333	3.61458
27.5466	3.60417	3.90625
27.5663	3.45833	3.82292
27.5859	3.91667	3.40625
27.6055	3.79167	3.84375
27.6252	3.375	3.19792
27.6448	3.875	3.60417
27.6644	3.375	3.89583
27.684	3.42708	3.42708
27.7037	3.54167	3.60417
27.7233	3.65625	3.4375
27.7429	3.8125	3.42708
27.7625	4.13542	3.47917
27.7822	4.04167	3.5625
27.8018	4.20833	3.57292
27.8214	4.55208	3.55208
27.841	4.625	4.14583
27.8607	4.5625	4.13542
27.8803	4.5625	4.09375
27.8999	4.39583	4.14583
27.9196	4.86458	4.21875
27.9392	4.875	4.52083
27.9588	4.94792	4.77083
27.9784	5.02083	4.76042
27.9981	4.96875	4.83333
28.0177	5.03125	4.6875
28.0373	4.51042	4.41667
28.0569	4.80208	4.67708
28.0766	4.63542	4.72917
28.0962	4.88542	4.25
28.1158	4.52083	4.42708
28.1355	4.76042	4.70833
28.1551	4.25	4.42708
28.1747	4.39583	4.55208
28.1943	4.39583	4.82292
28.214	3.89583	4.41667
28.2336	3.8125	4.16667
28.2532	3.96875	3.89583
28.2728	3.70833	4.55208
28.2925	3.53125	3.94792
28.3121	3.9375	3.875
28.3317	3.77083	4.46875
28.3514	3.78125	4.08333
28.371	3.64583	4.23958
28.3906	3.83333	3.69792
28.4102	3.77083	4.09375
28.4299	3.45833	3.65625
28.4495	3.5625	4.04167
28.4691	3.9375	3.8125
28.4887	3.76042	3.875
28.5084	3.70833	3.63542
28.528	3.85417	3.70833
28.5476	3.90625	3.59375
28.5672	3.80208	3.44792
28.5869	4.07292	3.76042
28.6065	3.82292	3.71875
28.6261	4.19792	3.88542
28.6458	4.36458	3.65625
28.6654	4.11458	3.83333
28.685	4.77083	3.79167
28.7046	5.07292	4.14583
28.7243	4.89583	4.51042
28.7439	4.91667	4.26042
28.7635	5.64583	4.52083
28.7831	5.46875	4.625
28.8028	6.33333	5.14583
28.8224	5.48958	5.07292
28.842	6	5.54167
28.8617	5.14583	5.45833
28.8813	5.15625	5.375
28.9009	5.47917	5.69792
28.9205	4.77083	5.58333
28.9402	4.64583	5.17708
28.9598	5.25	5.15625
28.9794	4.57292	5.05208
28.999	4.625	5.1875
29.0187	4.625	4.72917
29.0383	5.13542	4.375
29.0579	5.16667	4.66667
29.0776	5.17708	5.22917
29.0972	5.21875	4.875
29.1168	5.83333	4.77083
29.1364	6.48958	4.96875
29.1561	7.07292	5.01042
29.1757	8.33333	5.23958
29.1953	10.0312	5.77083
29.2149	11.8646	5.90625
29.2346	15.0625	6.85417
29.2542	18.1562	8.125
29.2738	19.9271	9.44792
29.2934	20.1875	11.5208
29.3131	20.6458	15.6562
29.3327	19.7396	19.0104
29.3523	18.6875	22.0417
29.372	17.1354	21.75
29.3916	14.9167	20.6562
29.4112	13.3646	19.1979
29.4308	10.8125	17.875
29.4505	9.47917	16.2188
29.4701	8.44792	13.75
29.4897	7.94792	10.7396
29.5093	7.26042	10.3021
29.529	6.19792	8.5
29.5486	5.91667	7.32292
29.5682	5.23958	6.52083
29.5879	5.0625	6.38542
29.6075	5.26042	5.59375
29.6271	4.78125	5.05208
29.6467	4.25	4.83333
29.6664	4.01042	4.66667
29.686	4.38542	4.5
29.7056	3.85417	4.125
29.7252	4	3.89583
29.7449	3.95833	3.94792
29.7645	4	3.69792
29.7841	3.9375	3.35417
29.8037	3.95833	3.51042
29.8234	3.86458	3.64583
29.843	3.86458	3.6875
29.8626	3.38542	3.46875
29.8823	3.1875	3.44792
29.9019	3.65625	3.26042
29.9215	3.58333	3.80208
29.9411	3.41667	3.46875
29.9608	3.41667	3.5
29.9804	3.33333	3.25
30	3.39583	3.57292
30.0196	3.32292	3.10417
30.0393	3.375	3.14583
30.0589	3.28125	3.20833
30.0785	3.33333	3.16667
30.0982	3.625	3.02083
30.1178	3.86458	3.34375
30.1374	3.55208	2.84375
30.157	3.88542	3.20833
30.1767	3.59375	3.33333
30.1963	4.15625	3.38542
30.2159	5.73958	3.10417
30.2355	6.45833	3.41667
30.2552	6.02083	3.66667
30.2748	6.26042	3.83333
30.2944	7.57292	4.01042
30.3141	7.58333	3.65625
30.3337	7.3125	4.82292
30.3533	6.34375	5.69792
30.3729	6.15625	5.98958
30.3926	5.28125	5.4375
30.4122	4.79167	4.78125
30.4318	4.30208	4.77083
30.4514	3.73958	4.61458
30.4711	3.65625	4.44792
30.4907	3.70833	3.79167
30.5103	3.64583	3.61458
30.5299	3.45833	3.26042
30.5496	3.54167	3.28125
30.5692	3.53125	3.23958
30.5888	3.44792	3.27083
30.6085	3.73958	3.5
30.6281	3.875	3.26042
30.6477	3.78125	3.15625
30.6673	4.10417	3.45833
30.687	3.72917	3.8125
30.7066	4.01042	3.73958
30.7262	3.8125	3.52083
30.7458	4.07292	3.32292
30.7655	4.27083	3.80208
30.7851	4.17708	3.82292
30.8047	4.39583	3.69792
30.8244	4.04167	3.59375
30.844	3.85417	3.92708
30.8636	3.52083	3.70833
30.8832	3.625	3.5625
30.9029	3.65625	3.625
30.9225	3.9375	3.67708
30.9421	3.82292	3.5
30.9617	4.11458	3.57292
30.9814	4.29167	3.39583
31.001	4.32292	3.46875
31.0206	4.51042	3.5625
31.0403	4.44792	3.65625
31.0599	5.19792	3.63542
31.0795	5.48958	3.77083
31.0991	5.59375	4.01042
31.1188	6.27083	4.34375
31.1384	6.07292	3.97917
31.158	6.8125	5.625
31.1776	7.34375	5.47917
31.1973	7.4375	6.08333
31.2169	7.46875	6.55208
31.2365	7.57292	6.04167
31.2561	8	6.55208
31.2758	7.84375	6.58333
31.2954	8.51042	6.38542
31.315	8.96875	6.375
31.3347	10.1146	7.125
31.3543	10.9583	7.21875
31.3739	10.8854	7.95833
31.3935	10.5729	8.98958
31.4132	10.5417	11.3229
31.4328	10.8542	13.7188
31.4524	9.97917	13.4792
31.472	10.2396	10.7083
31.4917	11.6667	9.77083
31.5113	12.1875	10.9792
31.5309	14.0208	11.2292
31.5506	16.5104	10.8542
31.5702	20.7604	10.0833
31.5898	24.1354	11.6562
31.6094	24.0208	12.75
31.6291	22.9688	14.6979
31.6487	25.4792	16.8229
31.6683	24.375	18.6979
31.6879	19.8438	18.0208
31.7076	16.8854	19.4375
31.7272	15.8125	19.0208
31.7468	13.4271	17.3854
31.7665	10.2292	15.5208
31.7861	9.82292	13.3229
31.8057	8.55208	11.3646
31.8253	7.21875	10.4583
31.845	6.95833	9.19792
31.8646	6.72917	8.07292
31.8842	6.33333	6.89583
31.9038	6.22917	6.875
31.9235	6.45833	5.84375
31.9431	7.07292	6.08333
31.9627	6.94792	6.10417
31.9823	7.23958	5.46875
32.002	8.59375	6.19792
32.0216	10.25	6.63542
32.0412	10.4896	7.40625
32.0609	12.2917	7.91667
32.0805	12	8.91667
32.1001	12.5104	9.58333
32.1197	11.6979	10.5938
32.1394	10.8542	12.6146
32.159	9.02083	12.9479
32.1786	8	11.3542
32.1982	7.36458	9.89583
32.2179	6.17708	9.64583
32.2375	5.72917	8.3125
32.2571	5.08333	7.07292
32.2768	4.47917	6.10417
32.2964	4.38542	4.91667
32.316	3.80208	4.48958
32.3356	4.0625	4.625
32.3553	3.5	4.28125
32.3749	3.875	4.45833
32.3945	4.35417	3.89583
32.4141	4.41667	3.92708
32.4338	4.375	3.80208
32.4534	4.14583	3.94792
32.473	4.16667	3.65625
32.4926	4.88542	4.13542
32.5123	5.22917	3.8125
32.5319	5.28125	4.125
32.5515	5.65625	4.125
32.5712	6.21875	4.40625
32.5908	6.4375	4.875
32.6104	6.61458	5.44792
32.63	7.28125	5.32292
32.6497	8.14583	5.89583
32.6693	9.17708	5.95833
32.6889	9.10417	6.34375
32.7085	9.83333	6.97917
32.7282	10.8125	7.75
32.7478	11.4167	8.46875
32.7674	11.7396	9
32.7871	11.3229	9.84375
32.8067	10.7917	10.3542
32.8263	10.25	11.1667
32.8459	9.28125	10.8854
32.8656	8.73958	11.9062
32.8852	7.875	10.3646
32.9048	7.03125	9.45833
32.9244	6.67708	8.38542
32.9441	5.875	7.9375
32.9637	5.40625	7.4375
32.9833	5.01042	6.375
33.003	4.625	5.5625
33.0226	4.83333	5.02083
33.0422	4.36458	5.21875
33.0618	3.96875	4.28125
33.0815	4.57292	4.07292
33.1011	4.10417	3.89583
33.1207	3.91667	3.61458
33.1403	3.89583	4.07292
33.16	3.67708	3.8125
33.1796	3.6875	3.83333
33.1992	3.63542	3.46875
33.2188	3.45833	3.60417
33.2385	3.30208	3.1875
33.2581	3.1875	3.09375
33.2777	3.30208	3.41667
33.2974	3.07292	3.08333
33.317	3.3125	3.125
33.3366	3.4375	3.08333
33.3562	3.14583	3.21875
33.3759	3.54167	3.47917
33.3955	3.1875	3.36458
33.4151	3.27083	3.01042
33.4347	3.45833	3.07292
33.4544	3.63542	3.28125
33.474	3.27083	3.07292
33.4936	3.84375	3.44792
33.5133	3.92708	2.89583
33.5329	4.32292	3.23958
33.5525	4.63542	3.25
33.5721	4.26042	3.32292
33.5918	4.1875	4.07292
33.6114	4.63542	4.125
33.631	4.69792	3.8125
33.6506	5.26042	4.48958
33.6703	4.98958	4.67708
33.6899	4.57292	4.90625
33.7095	4.58333	4.14583
33.7292	4.20833	4.42708
33.7488	4.45833	4.58333
33.7684	4.33333	4.20833
33.788	4.55208	4.54167
33.8077	4.65625	3.76042
33.8273	4.1875	4.46875
33.8469	5.17708	4.25
33.8665	5.625	4.20833
33.8862	5.625	3.90625
33.9058	6.01042	4.83333
33.9254	7.03125	4.48958
33.945	6.48958	4.89583
33.9647	6.91667	5.60417
33.9843	6.5625	6.22917
34.0039	6.38542	6.57292
34.0236	5.36458	7.02083
34.0432	5.14583	5.97917
34.0628	4.80208	5.75
34.0824	3.97917	5.33333
34.1021	3.98958	5.05208
34.1217	3.8125	4.71875
34.1413	3.3125	3.88542
34.1609	3.125	3.94792
34.1806	3.22917	3.19792
34.2002	3.27083	3.19792
34.2198	2.88542	3.29167
34.2395	3.33333	2.96875
34.2591	2.86458	3.28125
34.2787	3.125	3.05208
34.2983	3.20833	2.92708
34.318	2.875	2.86458
34.3376	3.34375	2.90625
34.3572	3.89583	2.84375
34.3768	3.33333	2.96875
34.3965	3.5	2.72917
34.4161	3.625	3.13542
34.4357	4.03125	3.14583
34.4554	4.23958	3.22917
34.475	4.26042	3.25
34.4946	4.14583	3.64583
34.5142	4.46875	3.82292
34.5339	4.10417	4.09375
34.5535	3.90625	4
34.5731	3.92708	3.9375
34.5927	3.92708	4.11458
34.6124	3.5625	4.22917
34.632	3.3125	4.10417
34.6516	3.44792	3.44792
34.6712	3.07292	3.52083
34.6909	2.77083	3.02083
34.7105	2.91667	2.95833
34.7301	2.82292	2.95833
34.7498	3.25	2.88542
34.7694	3.20833	2.875
34.789	3.07292	2.70833
34.8086	3.08333	2.875
34.8283	3.10417	2.75
34.8479	3.28125	2.75
34.8675	3.5	2.86458
34.8871	3.53125	2.86458
34.9068	3.02083	2.84375
34.9264	3.5625	2.97917
34.946	2.95833	2.5625
34.9657	3.27083	2.4375
34.9853	3.03125	2.60417
35.0049	3.15625	2.60417
35.0245	3.21875	2.5625
35.0442	2.97917	2.82292
35.0638	2.72917	2.88542
35.0834	3.19792	2.36458
35.103	3.3125	2.89583
35.1227	3.04167	2.4375
35.1423	3.26042	2.8125
35.1619	3.29167	2.94792
35.1815	3.60417	2.625
35.2012	3.02083	2.55208
35.2208	3.16667	3.15625
35.2404	3.4375	2.66667
35.2601	3.61458	3.16667
35.2797	3.46875	2.73958
35.2993	3.36458	3.19792
35.3189	3.0625	3.22917
35.3386	3.64583	2.88542
35.3582	3.63542	3.15625
35.3778	3.54167	3.41667
35.3974	3.51042	3.21875
35.4171	3.35417	3.38542
35.4367	3.125	3.25
35.4563	2.9375	3.42708
35.476	3.16667	3.13542
35.4956	3.16667	2.79167
35.5152	3.15625	3.02083
35.5348	3.40625	3.08333
35.5545	3.64583	2.83333
35.5741	3.51042	3.01042
35.5937	3.42708	2.89583
35.6133	3.16667	3.53125
35.633	2.94792	3.02083
35.6526	3.5625	3.01042
35.6722	3.26042	2.96875
35.6919	3.46875	2.83333
35.7115	3.29167	3.03125
35.7311	3.72917	2.98958
35.7507	3.80208	3.33333
35.7704	3.48958	2.89583
35.79	4.04167	3.08333
35.8096	4.23958	3.20833
35.8292	4.3125	3.36458
35.8489	4.79167	3.59375
35.8685	4.53125	3.76042
35.8881	4.66667	3.88542
35.9077	4.76042	4.19792
35.9274	4.47917	4.80208
35.947	4.36458	4.11458
35.9666	3.83333	3.96875
35.9863	3.76042	4.48958
36.0059	3.44792	4.09375
36.0255	3.36458	3.72917
36.0451	3.57292	3.76042
36.0648	3.73958	3.51042
36.0844	3.09375	3.52083
36.104	3.07292	3.14583
36.1236	2.73958	2.94792
36.1433	2.5	3.16667
36.1629	3.02083	2.97917
36.1825	2.96875	2.98958
36.2022	2.48958	2.79167
36.2218	2.40625	2.86458
36.2414	2.9375	2.4375
36.261	2.73958	2.70833
36.2807	2.86458	2.64583
36.3003	2.70833	2.64583
36.3199	2.82292	2.6875
36.3395	3.03125	2.55208
36.3592	3.01042	2.79167
36.3788	3.22917	2.39583
36.3984	2.79167	2.42708
36.4181	3.20833	2.72917
36.4377	3.08333	3.08333
36.4573	3.13542	2.63542
36.4769	3.40625	3
36.4966	3.17708	2.9375
36.5162	2.97917	2.92708
36.5358	2.89583	2.95833
36.5554	3.20833	3.30208
36.5751	2.70833	2.85417
36.5947	2.96875	2.63542
36.6143	3.25	2.66667
36.6339	3.07292	2.77083
36.6536	3.39583	2.88542
36.6732	3.16667	2.92708
36.6928	3.15625	2.51042
36.7125	3.3125	2.69792
36.7321	3.19792	3.20833
36.7517	3.27083	2.73958
36.7713	2.85417	2.73958
36.791	2.91667	2.78125
36.8106	3.03125	2.84375
36.8302	3.07292	2.88542
36.8498	2.90625	3.04167
36.8695	2.70833	2.96875
36.8891	2.44792	2.40625
36.9087	2.52083	2.78125
36.9284	3	2.35417
36.948	2.33333	2.15625
36.9676	2.86458	2.32292
36.9872	2.57292	2.40625
37.0069	2.5625	2.45833
37.0265	2.52083	2.64583
37.0461	2.61458	2.52083
37.0657	2.5625	2.5625
37.0854	2.89583	2.32292
37.105	2.70833	2.39583
37.1246	2.625	2.47917
37.1443	2.76042	2.65625
37.1639	2.64583	2.42708
37.1835	2.61458	2.34375
37.2031	2.79167	2.59375
37.2228	2.98958	2.72917
37.2424	2.59375	2.1875
37.262	3.04167	2.59375
37.2816	2.83333	2.6875
37.3013	2.79167	2.39583
37.3209	2.72917	2.88542
37.3405	2.88542	2.39583
37.3601	2.625	2.41667
37.3798	3	2.59375
37.3994	2.70833	2.5
37.419	2.70833	2.28125
37.4387	2.79167	2.85417
37.4583	2.77083	2.59375
37.4779	2.64583	2.64583
37.4975	2.375	2.44792
37.5172	2.6875	2.40625
37.5368	2.44792	2.21875
37.5564	2.47917	2.76042
37.576	2.76042	2.58333
37.5957	2.36458	2.48958
37.6153	2.41667	2.48958
37.6349	2.63542	2.51042
37.6546	2.66667	2.39583
37.6742	2.36458	2.38542
37.6938	2.61458	2.05208
37.7134	2.60417	2.16667
37.7331	2.47917	2.21875
37.7527	2.375	2.32292
37.7723	2.46875	2.60417
37.7919	2.54167	2.27083
37.8116	2.51042	2.21875
37.8312	2.38542	2.05208
37.8508	2.40625	2.20833
37.8704	2.5	2.30208
37.8901	2.34375	2.28125
37.9097	2.28125	2.42708
37.9293	2.38542	2.46875
37.949	2.71875	2.0625
37.9686	2.5625	2.29167
37.9882	2.98958	2.23958
38.0078	3.08333	2.625
38.0275	3.23958	2.40625
38.0471	2.95833	2.88542
38.0667	2.75	2.625
38.0863	3.34375	2.85417
38.106	3.33333	2.5625
38.1256	3.25	2.76042
38.1452	3.34375	2.95833
38.1649	3.32292	2.55208
38.1845	2.92708	2.96875
38.2041	3.20833	2.76042
38.2237	2.83333	2.95833
38.2434	2.48958	2.9375
38.263	2.75	2.57292
38.2826	2.73958	2.72917
38.3022	2.6875	2.47917
38.3219	2.40625	2.40625
38.3415	2.44792	2.5
38.3611	2.51042	2.375
38.3808	2.60417	2.42708
38.4004	2.59375	2.04167
38.42	2.77083	2.17708
38.4396	2.75	2.19792
38.4593	2.94792	2.60417
38.4789	3.22917	2.34375
38.4985	3.04167	3.05208
38.5181	3.26042	2.72917
38.5378	3.03125	2.625
38.5574	2.86458	2.88542
38.577	2.85417	2.80208
38.5966	2.60417	2.21875
38.6163	2.80208	2.59375
38.6359	2.57292	2.60417
38.6555	2.64583	2.40625
38.6752	2.64583	2.40625
38.6948	2.60417	2.58333
38.7144	2.96875	2.38542
38.734	2.61458	2.3125
38.7537	2.59375	2.25
38.7733	2.79167	2.61458
38.7929	3.05208	2.29167
38.8125	2.90625	2.45833
38.8322	2.48958	2.5
38.8518	2.9375	2.77083
38.8714	2.70833	2.53125
38.8911	2.75	2.44792
38.9107	2.72917	2.63542
38.9303	2.91667	2.57292
38.9499	2.94792	2.36458
38.9696	3.1875	2.8125
38.9892	3.26042	2.53125
39.0088	3.0625	2.65625
39.0284	3.51042	2.875
39.0481	3.55208	3.03125
39.0677	3.5625	2.96875
39.0873	3.375	3.01042
39.107	3.55208	2.82292
39.1266	3.72917	2.95833
39.1462	4.02083	3.51042
39.1658	3.72917	3.5
39.1855	3.72917	3.54167
39.2051	3.96875	3.66667
39.2247	4.72917	3.77083
39.2443	4.88542	3.67708
39.264	5.03125	3.85417
39.2836	5.67708	4.26042
39.3032	5.75	4.04167
39.3228	5.90625	4.375
39.3425	5.94792	4.77083
39.3621	5.71875	5.65625
39.3817	5.40625	5.3125
39.4014	5.26042	5.26042
39.421	4.92708	5
39.4406	4.77083	5.13542
39.4602	4.98958	4.82292
39.4799	4.45833	4.48958
39.4995	4.48958	4.45833
39.5191	4.88542	4.0625
39.5387	4.65625	4.46875
39.5584	4.75	3.61458
39.578	4.98958	4.03125
39.5976	5.17708	4.10417
39.6173	5.17708	4.0625
39.6369	5.32292	4.17708
39.6565	5.70833	4.08333
39.6761	5.45833	4.52083
39.6958	5.4375	4.89583
39.7154	5	4.92708
39.735	4.97917	5.375
39.7546	4.57292	4.72917
39.7743	4.8125	4.79167
39.7939	4.28125	3.8125
39.8135	3.86458	4.3125
39.8332	3.73958	3.78125
39.8528	3.5	3.78125
39.8724	3.22917	3.8125
39.892	2.94792	3.26042
39.9117	3.29167	3.36458
39.9313	2.875	3.10417
39.9509	2.78125	3.1875
39.9705	3.08333	2.67708
39.9902	3.08333	2.48958
40.0098	2.65625	2.8125
40.0294	3.08333	2.52083
40.049	2.91667	2.9375
40.0687	2.80208	2.44792
40.0883	2.65625	2.5625
40.1079	2.78125	2.36458
40.1276	2.45833	2.23958
40.1472	2.5	2.61458
40.1668	2.44792	2.61458
40.1864	2.72917	2.76042
40.2061	2.29167	2.375
40.2257	2.64583	2.36458
40.2453	2.83333	2.5625
40.2649	2.55208	2.44792
40.2846	2.34375	2.69792
40.3042	2.59375	2.27083
40.3238	2.34375	2.38542
40.3435	2.59375	2.55208
40.3631	2.53125	2.70833
40.3827	2.48958	2.63542
40.4023	2.5625	2.79167
40.422	2.46875	2.63542
40.4416	2.9375	2.76042
40.4612	2.625	2.53125
40.4808	2.44792	2.70833
40.5005	2.41667	2.63542
40.5201	2.44792	2.4375
40.5397	2.61458	2.53125
40.5593	2.375	2.26042
40.579	2.55208	2.44792
40.5986	2.66667	2.47917
40.6182	2.64583	2.5625
40.6379	2.41667	2.41667
40.6575	2.29167	2.35417
40.6771	2.29167	2.27083
40.6967	2.625	2.21875
40.7164	2.39583	2.29167
40.736	2.41667	2.19792
40.7556	2.09375	2.23958
40.7752	2.54167	2.35417
40.7949	2.375	2.25
40.8145	2.44792	2.47917
40.8341	2.70833	2.0625
40.8538	2.32292	2.30208
40.8734	2.3125	2.15625
40.893	2.29167	2.13542
40.9126	2.64583	2.58333
40.9323	2.40625	2.20833
40.9519	2.26042	2.375
40.9715	2.375	2.36458
40.9911	2.33333	2.23958
41.0108	2.46875	2.46875
41.0304	2.51042	1.95833
41.05	2.58333	2.07292
41.0697	2.6875	2.36458
41.0893	2.5	2.26042
41.1089	2.64583	2.3125
41.1285	2.70833	2.5
41.1482	2.79167	2.375
41.1678	2.92708	2.82292
41.1874	2.71875	2.41667
41.207	2.45833	2.41667
41.2267	2.60417	2.54167
41.2463	2.72917	2.41667
41.2659	2.70833	2.65625
41.2855	2.71875	2.70833
41.3052	2.67708	2.60417
41.3248	2.38542	2.58333
41.3444	2.5625	2.17708
41.3641	2.78125	2.51042
41.3837	2.59375	2.51042
41.4033	2.75	2.25
41.4229	2.48958	2.375
41.4426	2.23958	2.33333
41.4622	2.21875	2.125
41.4818	2.33333	2.42708
41.5014	2.14583	2.35417
41.5211	2.22917	2.22917
41.5407	2.29167	1.9375
41.5603	2.53125	2.16667
41.58	2.60417	2.07292
41.5996	2.46875	2.08333
41.6192	2.4375	2.42708
41.6388	2.28125	2.28125
41.6585	2.54167	2.29167
41.6781	2.67708	2.42708
41.6977	2.64583	2.26042
41.7173	2.94792	2.69792
41.737	2.96875	2.53125
41.7566	3.02083	2.64583
41.7762	3.03125	2.375
41.7959	3.10417	2.32292
41.8155	3.16667	2.57292
41.8351	3.34375	2.72917
41.8547	3.25	2.69792
41.8744	3.16667	2.61458
41.894	3.47917	3.09375
41.9136	3.44792	2.95833
41.9332	3.32292	3.125
41.9529	3.11458	3.3125
41.9725	2.98958	2.89583
41.9921	3.375	3.28125
42.0117	3.20833	2.86458
42.0314	3.20833	3.22917
42.051	3.10417	2.95833
42.0706	3.34375	3.04167
42.0903	3.25	2.79167
42.1099	3.03125	2.91667
42.1295	3.22917	2.875
42.1491	3.16667	2.47917
42.1688	3.40625	3.08333
42.1884	3.09375	3.3125
42.208	3.3125	2.78125
42.2276	3.0625	3.27083
42.2473	2.94792	2.78125
42.2669	3.13542	3.05208
42.2865	3.5625	3.0625
42.3062	3.25	3.01042
42.3258	3	3
42.3454	2.92708	2.5625
42.365	2.65625	2.63542
42.3847	2.76042	2.65625
42.4043	2.70833	2.44792
42.4239	2.78125	2.92708
42.4435	2.29167	2.55208
42.4632	2.30208	2.21875
42.4828	2.84375	2.36458
42.5024	2.66667	2.47917
42.5221	2.71875	2.60417
42.5417	2.45833	2.32292
42.5613	2.59375	2.375
42.5809	2.44792	2.20833
42.6006	2.57292	2.5625
42.6202	2.38542	2.21875
42.6398	2.11458	2.22917
42.6594	2.29167	2.21875
42.6791	2.375	2.28125
42.6987	2.54167	1.98958
42.7183	2.33333	2.16667
42.7379	2.20833	2.30208
42.7576	2.29167	2.16667
42.7772	2.34375	2.32292
42.7968	2.67708	2.29167
42.8165	2.77083	2.54167
42.8361	2.61458	2.45833
42.8557	2.75	2.21875
42.8753	2.77083	2.61458
42.895	2.71875	2.58333
42.9146	3.3125	2.48958
42.9342	3.1875	2.75
42.9538	3.125	2.59375
42.9735	3.58333	2.78125
42.9931	3.63542	2.8125
43.0127	4.61458	2.92708
43.0324	4.57292	2.875
43.052	4.84375	3.125
43.0716	5.07292	4.02083
43.0912	4.4375	4.13542
43.1109	4.375	4.41667
43.1305	4.39583	4.47917
43.1501	4.44792	3.95833
43.1697	4.02083	4.0625
43.1894	4.10417	3.90625
43.209	3.5625	4.15625
43.2286	3.26042	3.71875
43.2482	3.34375	3.08333
43.2679	3.30208	3.125
43.2875	3.01042	2.92708
43.3071	2.875	3.15625
43.3268	2.71875	2.82292
43.3464	2.75	2.6875
43.366	2.46875	2.54167
43.3856	2.34375	2.64583
43.4053	2.52083	2.375
43.4249	2.45833	2.5
43.4445	2.5	2.40625
43.4641	2.39583	2.0625
43.4838	2.42708	2.38542
43.5034	2.46875	2.40625
43.523	2.29167	2.26042
43.5427	2.63542	2.21875
43.5623	2.61458	2.45833
43.5819	2.23958	2.21875
43.6015	2.39583	2.23958
43.6212	2.67708	2.34375
43.6408	2.5	2.53125
43.6604	2.61458	2.4375
43.68	2.72917	2.67708
43.6997	2.86458	2.40625
43.7193	2.75	2.17708
43.7389	3.01042	2.6875
43.7586	2.77083	2.58333
43.7782	3.10417	2.5625
43.7978	2.8125	2.79167
43.8174	2.51042	2.75
43.8371	2.89583	3
43.8567	2.55208	2.94792
43.8763	2.58333	2.59375
43.8959	2.69792	2.39583
43.9156	2.55208	2.64583
43.9352	2.29167	2.5
43.9548	2.5	2.35417
43.9744	2.34375	2.44792
43.9941	2.14583	2.52083
44.0137	2.38542	2.41667
44.0333	2.20833	2.13542
44.053	2.47917	2.15625
44.0726	2.40625	2.375
44.0922	2.4375	2.60417
44.1118	2.86458	2.20833
44.1315	2.59375	2.03125
44.1511	2.98958	2.41667
44.1707	3.63542	2.63542
44.1903	3.67708	2.41667
44.21	4.40625	2.72917
44.2296	4.09375	2.97917
44.2492	3.77083	3.20833
44.2689	3.77083	3.38542
44.2885	3.59375	3.5625
44.3081	3.52083	3.58333
44.3277	3.89583	3.375
44.3474	3.10417	2.83333
44.367	2.85417	3.02083
44.3866	3.35417	3.04167
44.4062	2.83333	2.8125
44.4259	3.01042	2.69792
44.4455	2.52083	2.84375
44.4651	2.60417	2.47917
44.4848	2.55208	2.54167
44.5044	2.28125	2.33333
44.524	2.40625	2.27083
44.5436	2.29167	2.17708
44.5633	2.22917	2.35417
44.5829	2.1875	2.125
44.6025	2.23958	2.42708
44.6221	2.1875	2.30208
44.6418	2.15625	2.08333
44.6614	2.36458	2.36458
44.681	2.28125	2.38542
44.7006	2.15625	2.08333
44.7203	2.42708	2.09375
44.7399	2.39583	2.27083
44.7595	2.52083	2.21875
44.7792	2.25	2.19792
44.7988	2.67708	2.32292
44.8184	2.75	2.09375
44.838	2.52083	2.30208
44.8577	2.48958	2.14583
44.8773	2.35417	2
44.8969	2.05208	2.03125
44.9165	2.625	2.30208
44.9362	2.20833	2.41667
44.9558	2.1875	2.30208
44.9754	2.61458	2.34375
44.9951	2.5	2.38542
45.0147	2.34375	2.19792
45.0343	2.25	2.30208
45.0539	2.51042	2.13542
45.0736	2.42708	2.51042
45.0932	2.96875	2.35417
45.1128	2.77083	2.33333
45.1324	2.90625	2.35417
45.1521	3.23958	2.46875
45.1717	3.09375	2.89583
45.1913	2.89583	2.6875
45.211	3.26042	2.67708
45.2306	3.33333	3.30208
45.2502	3.29167	3.08333
45.2698	4.21875	3.15625
45.2895	4.375	3.02083
45.3091	5.90625	3.33333
45.3287	6.28125	3.40625
45.3483	7.03125	4.07292
45.368	6.73958	3.875
45.3876	4.91667	4.70833
45.4072	4.69792	4.58333
45.4268	4.66667	4.21875
45.4465	4.28125	3.40625
45.4661	4.32292	3.3125
45.4857	4.6875	3.23958
45.5054	3.94792	3.40625
45.525	2.96875	3.17708
45.5446	2.41667	3.52083
45.5642	2.57292	2.625
45.5839	2.27083	2.66667
45.6035	2.125	2.41667
45.6231	2.41667	2.58333
45.6427	2.40625	2.19792
45.6624	2.58333	2.33333
45.682	2.21875	2.32292
45.7016	2.13542	2.23958
45.7213	2.23958	2.09375
45.7409	2.11458	2.38542
45.7605	1.95833	2.33333
45.7801	2.27083	2.53125
45.7998	2.58333	2.23958
45.8194	2.23958	2.40625
45.839	2.3125	2.13542
45.8586	2.17708	2.08333
45.8783	2.16667	2.17708
45.8979	2.52083	2.22917
45.9175	2.13542	2.0625
45.9371	2.11458	2.41667
45.9568	2.35417	2.03125
45.9764	2.05208	2.40625
45.996	2.36458	2
46.0157	2.15625	2.10417
46.0353	2.125	2.08333
46.0549	2.1875	2.5
46.0745	2.42708	2.375
46.0942	2.375	2.19792
46.1138	2.38542	1.90625
46.1334	2.34375	2.11458
46.153	2.47917	2.02083
46.1727	2.96875	2.28125
46.1923	2.44792	2.22917
46.2119	2.55208	2.32292
46.2316	2.5625	2.17708
46.2512	2.58333	2.21875
46.2708	2.60417	2.29167
46.2904	2.75	2.39583
46.3101	2.78125	2.28125
46.3297	2.77083	2.22917
46.3493	2.69792	2.35417
46.3689	3.22917	2.60417
46.3886	3.73958	2.5625
46.4082	3.59375	2.83333
46.4278	4.375	2.73958
46.4475	4.54167	2.64583
46.4671	4.6875	2.95833
46.4867	5.5	3.17708
46.5063	5.42708	3.875
46.526	5.63542	4.03125
46.5456	6.09375	4.59375
46.5652	6.26042	4.76042
46.5848	6.35417	5.1875
46.6045	6.15625	5.29167
46.6241	5.84375	5.5625
46.6437	5.36458	5.33333
46.6633	5.48958	5.36458
46.683	5.3125	5.28125
46.7026	4.5	4.75
46.7222	4.66667	4.5625
46.7419	4.48958	4.52083
46.7615	3.94792	4.45833
46.7811	3.48958	4.01042
46.8007	3.77083	3.48958
46.8204	3.875	3.41667
46.84	3.44792	3.47917
46.8596	3.14583	3.15625
46.8792	3.27083	3.15625
46.8989	3.32292	2.96875
46.9185	3.59375	3.02083
46.9381	3.10417	2.80208
46.9578	3.34375	2.78125
46.9774	3.42708	2.83333
46.997	3.76042	3.09375
47.0166	3.38542	2.97917
47.0363	3.15625	3.10417
47.0559	3.61458	2.92708
47.0755	3.4375	2.90625
47.0951	3.57292	3.19792
47.1148	3.21875	3.64583
47.1344	3.47917	3.375
47.154	3.42708	3.13542
47.1737	3.47917	3.1875
47.1933	3.10417	3.09375
47.2129	3.48958	2.88542
47.2325	2.95833	3.33333
47.2522	3.70833	2.98958
47.2718	3.71875	3.29167
47.2914	3.67708	3.5
47.311	4.34375	3.01042
47.3307	4.59375	3.38542
47.3503	4.48958	3.48958
47.3699	4.94792	3.71875
47.3895	4.98958	3.77083
47.4092	4.83333	4.27083
47.4288	4.67708	4.64583
47.4484	4.72917	4.4375
47.4681	4.58333	4.11458
47.4877	4.25	4.38542
47.5073	4.19792	4.29167
47.5269	3.78125	4.1875
47.5466	3.67708	3.96875
47.5662	3.64583	3.88542
47.5858	3.59375	3.67708
47.6054	3.3125	3.76042
47.6251	2.96875	3.07292
47.6447	2.96875	3.10417
47.6643	3.17708	3
47.684	3.03125	2.71875
47.7036	2.73958	2.69792
47.7232	3.04167	2.51042
47.7428	2.75	2.64583
47.7625	2.67708	2.40625
47.7821	3.1875	2.48958
47.8017	2.89583	2.19792
47.8213	2.96875	2.625
47.841	3.19792	2.4375
47.8606	3.27083	2.70833
47.8802	3.96875	2.63542
47.8999	3.72917	2.77083
47.9195	3.39583	3.01042
47.9391	3.75	3.14583
47.9587	4.04167	3.36458
47.9784	3.95833	3.28125
47.998	3.97917	3.55208
48.0176	3.55208	3.15625
48.0372	3.45833	3.625
48.0569	3.25	3.55208
48.0765	3.47917	3.1875
48.0961	3.70833	3.375
48.1157	3.39583	3.15625
48.1354	3.34375	3.19792
48.155	3.15625	2.83333
48.1746	3.05208	3.125
48.1943	3.07292	2.61458
48.2139	3.26042	2.88542
48.2335	3.40625	2.75
48.2531	3.53125	2.66667
48.2728	3.91667	3.15625
48.2924	4.07292	3.08333
48.312	4.32292	3.04167
48.3316	5.04167	3.4375
48.3513	4.71875	3.55208
48.3709	5.53125	3.69792
48.3905	5.69792	3.86458
48.4102	5.39583	3.875
48.4298	5.63542	4.44792
48.4494	4.92708	4.61458
48.469	4.84375	4.78125
48.4887	5.16667	4.58333
48.5083	4.60417	5.10417
48.5279	4.78125	4.29167
48.5475	4.54167	4.36458
48.5672	3.6875	4.13542
48.5868	4.10417	3.82292
48.6064	3.33333	3.875
48.626	3.48958	3.46875
48.6457	3.28125	3.48958
48.6653	3.28125	3.3125
48.6849	3.35417	3.11458
48.7046	2.86458	3.10417
48.7242	2.94792	3.125
48.7438	2.79167	2.52083
48.7634	2.85417	2.77083
48.7831	2.77083	2.30208
48.8027	2.54167	2.54167
48.8223	2.33333	2.51042
48.8419	2.36458	2.375
48.8616	2.04167	2.22917
48.8812	2.34375	2.40625
48.9008	2.27083	2.48958
48.9205	2.44792	1.89583
48.9401	2.47917	2.15625
48.9597	2.3125	2.03125
48.9793	2.1875	2.11458
48.999	2.46875	2.38542
49.0186	2.41667	2.40625
49.0382	2.63542	2.375
49.0578	2.57292	2.25
49.0775	2.45833	2.08333
49.0971	2.98958	2.41667
49.1167	2.9375	2.28125
49.1364	2.85417	2.44792
49.156	3.375	2.55208
49.1756	2.79167	2.76042
49.1952	3.11458	2.67708
49.2149	3.44792	2.77083
[truncated: 2,078 more rows]

## Sheet: rainfall avs and pi conversion
Areal values from HadUK-Grid 1km gridded climate data from land surface network
Source: Met Office National Climate Information Centre
Monthly, seasonal and annual total precipitation amount for UK
Areal series, starting in 1862
Last updated 01-May-2021 10:56
UK													England and Wales
year jan feb mar apr may jun jul aug sep oct nov dec win spr sum aut ann													year jan feb mar apr may jun jul aug sep oct nov dec win spr sum aut ann
1990 169.9 193.3 94.7 60.2 35.6 93.8 49.4 72.8 82.2 142.6 79.0 130.4 482.2 190.5 216.0 303.8 1203.7													1990 133.7 143.6 23.1 38.9 24.7 72.1 35.2 46.9 53.1 102.5 66.8 101.4 412.0 86.7 154.2 222.3 841.9												841.9
1991 111.4 70.4 94.1 90.8 22.6 103.5 76.5 43.3 84.0 107.2 138.3 82.6 312.2 207.6 223.2 329.5 1024.7													1991 93.0 64.9 75.5 70.7 14.1 94.4 69.5 30.9 62.6 77.6 95.0 49.7 259.3 160.3 194.8 235.1 797.8												797.8
1992 78.8 89.6 127.9 91.1 58.9 39.2 86.7 162.9 118.2 95.9 161.3 107.0 251.0 277.9 288.8 375.4 1217.5													1992 48.7 47.3 85.2 74.1 48.6 38.3 83.7 130.9 92.2 84.1 138.5 83.6 145.6 207.8 252.9 314.8 955.2												955.2
1993 175.5 33.3 58.8 102.6 98.7 68.4 94.5 62.1 99.7 94.0 73.5 188.8 315.8 260.1 224.9 267.1 1149.7													1993 112.7 15.5 25.5 93.6 88.1 64.8 82.8 54.5 111.9 88.1 72.5 165.5 211.8 207.2 202.0 272.5 975.4												975.4
1994 154.1 88.5 146.3 94.5 49.6 62.8 54.3 82.7 103.1 98.4 108.0 174.2 431.4 290.4 199.8 309.5 1216.5													1994 122.2 81.1 95.0 73.9 60.7 36.3 46.3 71.4 104.1 95.7 84.9 140.6 368.8 229.6 154.0 284.7 1012.2												1012.2
1995 181.0 143.0 94.1 40.7 59.7 29.7 57.9 18.4 135.5 117.3 99.8 73.4 498.2 194.5 105.9 352.5 1050.3													1995 159.4 113.1 66.7 26.8 48.3 22.8 40.1 10.3 111.1 56.7 81.6 82.8 413.1 141.8 73.2 249.4 819.6												819.6
1996 74.7 101.8 48.7 73.0 65.6 42.3 55.2 78.5 44.3 136.6 147.7 66.9 249.9 187.3 175.9 328.5 935.2													1996 63.0 82.1 42.6 50.3 57.0 29.6 41.5 80.0 34.1 89.3 126.0 52.3 227.9 149.9 151.1 249.3 747.7												747.7
1997 29.0 168.3 66.9 43.1 87.3 115.9 63.9 83.8 61.7 72.4 123.2 133.1 264.2 197.3 263.7 257.3 1048.7													1997 13.9 118.9 31.3 24.4 74.3 126.2 48.4 93.8 35.1 67.2 115.2 106.8 185.1 130.0 268.4 217.4 855.3												855.3
1998 134.1 81.9 105.2 121.1 41.3 121.8 93.0 78.9 92.6 187.7 118.4 122.5 349.1 267.6 293.7 398.7 1298.5													1998 118.1 23.0 97.8 123.8 33.1 126.5 60.0 51.3 93.6 163.7 85.1 92.4 247.9 254.7 237.8 342.5 1068.6												1068.6
1999 164.9 83.2 88.7 88.6 75.9 93.8 46.1 91.9 140.2 93.4 109.6 195.5 370.6 253.2 231.8 343.2 1271.8													1999 136.6 52.3 71.9 76.1 58.7 83.6 24.4 105.0 120.7 83.1 65.3 154.0 281.2 206.7 213.0 269.1 1031.7												1031.7
2000 101.9 131.6 67.7 123.8 77.6 58.3 59.7 85.3 133.8 199.6 176.4 156.7 429.0 269.1 203.4 509.8 1372.5													2000 55.3 97.9 38.5 134.8 85.1 48.7 64.0 67.6 123.7 182.9 177.5 139.1 307.2 258.3 180.3 484.0 1215.0												1215
2001 78.9 96.9 85.6 89.6 43.3 58.0 81.6 96.8 88.9 165.1 94.9 69.8 332.6 218.4 236.4 348.9 1049.4													2001 74.1 96.3 91.4 98.3 42.5 41.9 73.9 86.1 81.2 131.5 67.6 44.3 309.5 232.1 201.9 280.3 929.0												929
2002 134.4 175.2 75.5 68.0 101.6 86.7 98.4 73.8 40.6 153.8 163.1 109.2 379.4 245.1 258.9 357.5 1280.4													2002 94.9 140.8 49.3 53.8 93.7 57.4 83.2 67.1 34.7 133.3 154.2 128.8 280.1 196.8 207.7 322.2 1091.3												1091.3
2003 114.0 48.4 53.6 50.4 98.1 71.2 78.3 26.7 53.8 63.9 120.2 121.7 271.6 202.1 176.1 237.8 900.1													2003 86.0 38.8 38.8 45.6 74.7 67.2 75.6 17.4 36.4 57.1 99.9 100.2 253.6 159.1 160.2 193.4 737.7												737.7
2004 151.1 74.3 70.1 93.1 51.1 84.7 70.4 159.8 103.0 165.3 75.2 110.8 347.0 214.3 315.0 343.5 1208.9													2004 123.9 58.6 54.0 78.7 46.0 58.5 68.3 148.6 65.7 148.1 52.5 69.0 282.7 178.7 275.5 266.3 971.9												971.9
2005 126.5 69.8 72.9 91.0 72.6 71.6 59.4 85.4 92.0 141.6 116.1 80.5 307.2 236.5 216.5 349.7 1079.6													2005 67.5 50.2 51.9 74.4 47.6 56.5 66.3 59.6 68.1 121.2 90.0 68.6 186.7 173.9 182.3 279.3 821.9												821.9
2006 59.3 65.0 110.5 67.4 112.6 42.1 53.1 92.0 102.4 142.7 153.2 172.8 204.9 290.5 187.2 398.3 1173.2													2006 34.9 56.2 93.6 46.1 109.5 25.5 42.6 89.8 74.9 117.4 110.0 129.9 159.7 249.2 158.0 302.2 930.4												930.4
2007 152.9 110.1 88.2 26.6 114.2 136.2 134.7 85.8 66.9 64.5 101.3 114.3 435.7 229.0 356.8 232.7 1195.7													2007 110.4 100.9 62.7 12.6 110.2 148.9 135.6 56.8 50.6 47.2 73.2 99.6 341.2 185.5 341.3 171.0 1008.8												1008.8
2008 189.3 81.8 122.5 76.1 47.8 78.7 108.2 134.8 105.8 154.8 105.9 87.5 385.3 246.5 321.7 366.5 1293.2													2008 145.2 43.6 99.4 67.8 61.8 64.0 107.3 117.4 104.1 112.9 88.0 63.3 288.3 229.0 288.7 305.0 1074.8												1074.8
2009 119.3 59.8 79.0 60.0 81.7 61.7 145.5 114.7 63.8 107.4 215.0 100.2 266.6 220.7 321.9 386.2 1208.1													2009 94.1 49.9 44.7 44.8 59.6 57.6 142.0 65.3 33.2 76.1 191.0 101.4 207.3 149.1 264.8 300.3 959.6												959.6
2010 79.4 74.5 78.6 47.5 38.9 38.4 107.0 97.5 113.3 100.5 122.7 47.1 254.1 165.1 242.8 336.5 945.4													2010 71.7 71.9 64.4 27.1 32.8 37.2 74.3 98.4 88.6 79.4 98.2 37.5 245.1 124.3 209.9 266.1 781.4												781.4
2011 102.2 113.8 49.4 35.7 100.7 84.7 75.7 105.4 107.4 122.0 99.0 166.6 263.1 185.9 265.8 328.4 1162.6													2011 88.2 85.1 20.9 14.2 54.5 75.4 64.3 78.9 64.6 71.5 55.4 118.4 210.8 89.6 218.6 191.4 791.4												791.4
2012 110.1 59.4 36.7 128.2 65.6 149.0 118.4 111.3 111.8 125.6 135.1 178.4 336.1 230.5 378.7 372.6 1329.7													2012 72.9 34.6 27.1 141.0 57.1 157.7 116.2 98.7 94.3 112.8 127.5 164.8 226.0 225.2 372.6 334.6 1204.6												1204.6
2013 109.7 59.6 64.4 62.9 91.8 48.5 65.2 72.2 71.0 162.6 90.4 185.5 347.7 219.2 185.9 324.1 1084.0													2013 87.5 46.7 68.7 34.5 77.1 39.3 56.1 65.6 55.8 148.7 73.1 132.5 298.9 180.2 160.9 277.6 885.4												885.4
2014 187.0 167.8 79.8 67.5 99.4 54.5 64.3 137.9 22.5 157.3 123.3 131.4 540.3 246.7 256.7 303.1 1292.7													2014 173.4 139.6 53.4 56.6 100.4 47.9 52.3 112.3 15.2 112.9 110.8 86.2 445.4 210.3 212.5 239.0 1060.9												1060.9
2015 153.5 79.9 94.9 45.5 109.9 56.2 107.6 104.7 52.0 72.1 172.0 216.9 364.8 250.2 268.6 296.2 1265.3													2015 104.6 57.3 55.1 27.0 87.2 38.6 83.9 97.3 53.7 61.9 135.1 161.1 248.1 169.3 219.8 250.7 962.8												962.8
2016 178.7 110.1 83.8 77.3 61.4 96.1 78.5 85.2 96.3 47.0 105.1 77.3 505.7 222.5 259.7 248.4 1096.8													2016 140.6 82.8 81.8 65.9 56.0 100.4 46.1 69.7 72.5 37.5 102.7 42.0 384.4 203.8 216.2 212.7 898.0												898
2017 76.0 93.4 97.7 33.2 57.2 110.5 101.3 102.3 117.2 101.4 107.7 120.6 246.6 188.1 314.1 326.4 1118.6													2017 65.6 69.5 81.5 18.7 59.1 88.8 94.9 77.7 102.2 61.3 78.3 108.1 177.1 159.3 261.4 241.8 905.7												905.7
2018 132.5 68.7 103.9 84.0 47.8 34.7 54.2 83.1 101.4 104.3 121.7 117.7 321.7 235.6 172.0 327.4 1053.9													2018 101.4 52.7 108.3 83.4 47.2 15.4 39.6 70.9 69.6 74.0 99.9 111.3 262.2 238.9 126.0 243.6 873.9												873.9
2019 64.6 71.2 129.1 48.6 63.7 109.0 83.9 132.6 126.0 139.9 119.1 139.6 253.4 241.3 325.6 385.0 1227.2													2019 43.7 53.2 100.3 43.9 43.0 112.7 62.2 91.9 124.4 138.9 127.4 116.3 208.2 187.3 266.8 390.7 1057.9												1057.9
2020 121.7 209.1 78.0 29.1 32.7 105.7 95.2 120.0 74.3 179.3 100.9 162.1 470.4 139.7 321.0 354.5 1308.1													2020 80.9 173.2 55.2 29.7 10.3 95.1 71.9 118.5 49.2 149.9 71.7 147.7 370.5 95.3 285.5 270.8 1053.4												1053.4
2021 136.6 102.3 84.3 20.1 400.9													2021 135.6 84.2 56.4 11.8 367.4
https://www.metoffice.gov.uk/pub/data/weather/uk/climate/datasets/Rainfall/date/UK.txt													https://www.metoffice.gov.uk/pub/data/weather/uk/climate/datasets/Rainfall/date/England_and_Wales.txt
	UK annual precipitation	Englnd and Wales annual precipitation
1990	1203.7	841.9
1991	1024.7	797.8
1992	1217.5	955.2
1993	1149.7	975.4
1994	1216.5	1012.2
1995	1050.3	819.6
1996	935.2	747.7
1997	1048.7	855.3
1998	1298.5	1068.6
1999	1271.8	1031.7
2000	1372.5	1215
2001	1049.4	929
2002	1280.4	1091.3
2003	900.1	737.7
2004	1208.9	971.9
2005	1079.6	821.9
2006	1173.2	930.4
2007	1195.7	1008.8
2008	1293.2	1074.8
2009	1208.1	959.6										England and Wales since 1990					England and Wales since 2010
2010	945.4	781.4				Internal diameter of PVC tube - 44mm						Internal diameter of PVC tube - 31mm					Internal diameter of PVC tube - 31mm
2011	1162.6	791.4				Internal radius of PVC tube - 22mm						Internal radius of PVC tube - 15.5mm					Internal radius of PVC tube - 15.5mm
2012	1329.7	1204.6				Area of cross section pr2 = p 222 = 1520.5						Area of cross section pr2 = p 15.52 = 754.8					Area of cross section pr2 = p 15.52 = 754.8
2013	1084	885.4				Mean rainfall value = 27.3mm						Mean rainfall value = 945.8mm					Mean rainfall value = 952.3mm
2014	1292.7	1060.9				1520.5 x 27.3 = 41509 mm3						754.8 x 945.8 = 713889.8 mm3					754.8 x 952.3 = 718796 mm3
2015	1265.3	962.8				converted to ml = 41509 / 1000 = 42ml pd (per water column)						converted to ml = 713889.8 / 1000 = 714ml					converted to ml = 718796 / 1000 = 719ml
2016	1096.8	898				per batch = 42 x 6 = 252ml
2017	1118.6	905.7				six batches = 1512ml
2018	1053.9	873.9				16 water columns = 1512ml x 16 = 24,192ml (total solution)
2019	1227.2	1057.9
2020	1308.1	1053.4
2021
average since 2010	1171.3	952.309
average since 1990	1163.29	945.845

## Sheet: FTIR data
cm-1	A	A	A	A
	WAS	WASR	WA	WAR
4000	0.0369	0.0317	0.0289	0.024
3998	0.0369	0.0317	0.0289	0.024
3996	0.0369	0.0317	0.0289	0.024
3994	0.0369	0.0317	0.0289	0.024
3992	0.0369	0.0317	0.0289	0.024
3990	0.0369	0.0317	0.0289	0.024
3988	0.0369	0.0317	0.0289	0.024
3986	0.0369	0.0317	0.0289	0.0241
3984	0.0369	0.0317	0.0289	0.0241
3982	0.0369	0.0318	0.0289	0.0241
3980	0.0369	0.0318	0.0289	0.0241
3978	0.0369	0.0318	0.0289	0.0241
3976	0.0369	0.0318	0.0289	0.0241
3974	0.0369	0.0318	0.0289	0.0241
3972	0.0369	0.0318	0.0289	0.0241
3970	0.0369	0.0318	0.0289	0.0241
3968	0.0369	0.0318	0.0289	0.0241
3966	0.0369	0.0318	0.0289	0.0241
3964	0.0369	0.0318	0.0289	0.0241
3962	0.0369	0.0318	0.0289	0.0241
3960	0.0369	0.0318	0.0289	0.0241
3958	0.0369	0.0318	0.0289	0.0241
3956	0.0369	0.0318	0.0289	0.0241
3954	0.0369	0.0318	0.0289	0.0241
3952	0.0369	0.0318	0.0289	0.0241
3950	0.037	0.0318	0.0289	0.0241
3948	0.037	0.0318	0.0289	0.0241
3946	0.037	0.0318	0.0289	0.0241
3944	0.037	0.0318	0.0289	0.0241
3942	0.037	0.0318	0.0289	0.0241
3940	0.037	0.0318	0.0289	0.0241
3938	0.0371	0.0318	0.0289	0.0242
3936	0.0371	0.0318	0.0289	0.0242
3934	0.0371	0.0318	0.0289	0.0242
3932	0.0371	0.0318	0.0289	0.0242
3930	0.0371	0.0318	0.0289	0.0242
3928	0.0371	0.0318	0.0289	0.0242
3926	0.0372	0.0318	0.0289	0.0242
3924	0.0372	0.0318	0.0289	0.0242
3922	0.0372	0.0318	0.0289	0.0242
3920	0.0372	0.0318	0.0289	0.0242
3918	0.0372	0.0318	0.0289	0.0242
3916	0.0372	0.0318	0.0289	0.0242
3914	0.0372	0.0318	0.0289	0.0242
3912	0.0373	0.0319	0.0289	0.0242
3910	0.0373	0.0319	0.0289	0.0242
3908	0.0373	0.0319	0.0289	0.0242
3906	0.0373	0.0319	0.0289	0.0242
3904	0.0373	0.0319	0.0289	0.0242
3902	0.0373	0.0319	0.0289	0.0242
3900	0.0373	0.0319	0.0289	0.0242
3898	0.0374	0.0319	0.0289	0.0242
3896	0.0374	0.0319	0.0289	0.0243
3894	0.0374	0.0319	0.0289	0.0243
3892	0.0374	0.0319	0.0289	0.0243
3890	0.0374	0.0319	0.0289	0.0243
3888	0.0374	0.0319	0.0289	0.0243
3886	0.0374	0.0319	0.0289	0.0243
3884	0.0374	0.0319	0.0289	0.0243
3882	0.0374	0.0319	0.0289	0.0243
3880	0.0374	0.0319	0.0289	0.0243
3878	0.0374	0.0319	0.0289	0.0243
3876	0.0374	0.0319	0.0289	0.0243
3874	0.0374	0.0319	0.0289	0.0243
3872	0.0374	0.0319	0.0289	0.0243
3870	0.0374	0.0319	0.0289	0.0243
3868	0.0374	0.0319	0.0289	0.0243
3866	0.0374	0.0319	0.0289	0.0243
3864	0.0374	0.0319	0.0289	0.0243
3862	0.0374	0.0319	0.0289	0.0243
3860	0.0374	0.0319	0.0289	0.0243
3858	0.0374	0.032	0.0289	0.0243
3856	0.0374	0.032	0.0289	0.0243
3854	0.0374	0.032	0.0289	0.0242
3852	0.0374	0.032	0.0289	0.0242
3850	0.0374	0.032	0.0289	0.0242
3848	0.0374	0.032	0.0289	0.0242
3846	0.0374	0.032	0.0289	0.0242
3844	0.0374	0.032	0.0289	0.0242
3842	0.0374	0.032	0.0289	0.0242
3840	0.0374	0.032	0.0289	0.0242
3838	0.0374	0.032	0.0289	0.0242
3836	0.0374	0.032	0.029	0.0242
3834	0.0374	0.032	0.029	0.0242
3832	0.0374	0.032	0.029	0.0242
3830	0.0374	0.032	0.029	0.0242
3828	0.0374	0.0321	0.029	0.0242
3826	0.0374	0.0321	0.029	0.0242
3824	0.0374	0.0321	0.029	0.0242
3822	0.0374	0.0321	0.029	0.0242
3820	0.0374	0.0321	0.0291	0.0242
3818	0.0374	0.0321	0.0291	0.0242
3816	0.0374	0.0321	0.0291	0.0242
3814	0.0374	0.0321	0.0291	0.0242
3812	0.0374	0.0321	0.0291	0.0242
3810	0.0374	0.0322	0.0291	0.0242
3808	0.0374	0.0322	0.0291	0.0242
3806	0.0373	0.0322	0.0291	0.0242
3804	0.0374	0.0322	0.0291	0.0242
3802	0.0374	0.0322	0.0291	0.0242
3800	0.0374	0.0322	0.0291	0.0242
3798	0.0374	0.0322	0.0291	0.0242
3796	0.0374	0.0322	0.0291	0.0242
3794	0.0374	0.0322	0.0292	0.0242
3792	0.0374	0.0322	0.0292	0.0243
3790	0.0374	0.0322	0.0292	0.0243
3788	0.0374	0.0322	0.0292	0.0243
3786	0.0374	0.0322	0.0292	0.0243
3784	0.0374	0.0322	0.0292	0.0243
3782	0.0374	0.0322	0.0292	0.0243
3780	0.0374	0.0322	0.0292	0.0243
3778	0.0374	0.0322	0.0292	0.0243
3776	0.0374	0.0322	0.0292	0.0243
3774	0.0374	0.0322	0.0292	0.0243
3772	0.0374	0.0322	0.0292	0.0243
3770	0.0374	0.0322	0.0292	0.0243
3768	0.0374	0.0322	0.0292	0.0243
3766	0.0374	0.0322	0.0292	0.0243
3764	0.0374	0.0322	0.0292	0.0243
3762	0.0374	0.0322	0.0291	0.0243
3760	0.0374	0.0322	0.0291	0.0243
3758	0.0374	0.0321	0.0291	0.0243
3756	0.0374	0.0321	0.0291	0.0243
3754	0.0374	0.0321	0.0291	0.0243
3752	0.0374	0.0321	0.0291	0.0243
3750	0.0374	0.0321	0.0291	0.0243
3748	0.0374	0.0321	0.0291	0.0243
3746	0.0374	0.0321	0.029	0.0243
3744	0.0374	0.0321	0.029	0.0243
3742	0.0374	0.0321	0.029	0.0243
3740	0.0374	0.032	0.029	0.0243
3738	0.0374	0.032	0.029	0.0243
3736	0.0374	0.032	0.029	0.0243
3734	0.0374	0.032	0.029	0.0242
3732	0.0374	0.032	0.0289	0.0242
3730	0.0373	0.032	0.0289	0.0242
3728	0.0373	0.032	0.0289	0.0242
3726	0.0373	0.032	0.0289	0.0242
3724	0.0373	0.032	0.0289	0.0242
3722	0.0373	0.032	0.0289	0.0242
3720	0.0373	0.032	0.0289	0.0242
3718	0.0373	0.032	0.0289	0.0241
3716	0.0373	0.032	0.0289	0.0241
3714	0.0373	0.0319	0.0288	0.0241
3712	0.0373	0.0319	0.0288	0.0241
3710	0.0373	0.0319	0.0288	0.0241
3708	0.0373	0.0319	0.0288	0.0241
3706	0.0373	0.0319	0.0288	0.0241
3704	0.0373	0.0319	0.0288	0.0241
3702	0.0373	0.0319	0.0288	0.024
3700	0.0373	0.0319	0.0288	0.024
3698	0.0373	0.0319	0.0288	0.024
3696	0.0373	0.0319	0.0288	0.024
3694	0.0373	0.0319	0.0288	0.024
3692	0.0373	0.0319	0.0288	0.024
3690	0.0373	0.032	0.0288	0.024
3688	0.0373	0.032	0.0288	0.024
3686	0.0374	0.032	0.0289	0.024
3684	0.0374	0.032	0.0289	0.024
3682	0.0374	0.032	0.0289	0.024
3680	0.0374	0.032	0.0289	0.024
3678	0.0374	0.032	0.0289	0.024
3676	0.0374	0.0321	0.0289	0.024
3674	0.0375	0.0321	0.0289	0.024
3672	0.0375	0.0321	0.0289	0.024
3670	0.0375	0.0321	0.0289	0.024
3668	0.0375	0.0321	0.0289	0.024
3666	0.0376	0.0322	0.029	0.024
3664	0.0376	0.0322	0.029	0.024
3662	0.0376	0.0322	0.029	0.024
3660	0.0377	0.0322	0.029	0.024
3658	0.0377	0.0323	0.0291	0.0241
3656	0.0377	0.0323	0.0291	0.0241
3654	0.0378	0.0323	0.0292	0.0241
3652	0.0378	0.0324	0.0292	0.0241
3650	0.0379	0.0324	0.0292	0.0242
3648	0.0379	0.0324	0.0293	0.0242
3646	0.0379	0.0325	0.0293	0.0242
3644	0.038	0.0325	0.0293	0.0243
3642	0.038	0.0325	0.0293	0.0243
3640	0.0381	0.0326	0.0294	0.0243
3638	0.0381	0.0326	0.0294	0.0244
3636	0.0381	0.0326	0.0294	0.0244
3634	0.0382	0.0327	0.0295	0.0244
3632	0.0382	0.0327	0.0295	0.0245
3630	0.0383	0.0327	0.0296	0.0245
3628	0.0383	0.0328	0.0296	0.0245
3626	0.0384	0.0328	0.0296	0.0246
3624	0.0384	0.0328	0.0297	0.0246
3622	0.0385	0.0329	0.0297	0.0246
3620	0.0385	0.0329	0.0298	0.0247
3618	0.0386	0.033	0.0298	0.0247
3616	0.0386	0.033	0.0298	0.0247
3614	0.0387	0.033	0.0299	0.0248
3612	0.0387	0.0331	0.0299	0.0248
3610	0.0387	0.0331	0.0299	0.0248
3608	0.0388	0.0331	0.03	0.0249
3606	0.0388	0.0332	0.03	0.0249
3604	0.0389	0.0332	0.03	0.0249
3602	0.0389	0.0332	0.0301	0.0249
3600	0.039	0.0332	0.0301	0.025
3598	0.039	0.0333	0.0302	0.025
3596	0.0391	0.0333	0.0302	0.025
3594	0.0391	0.0333	0.0302	0.0251
3592	0.0392	0.0334	0.0303	0.0251
3590	0.0392	0.0334	0.0303	0.0251
3588	0.0393	0.0334	0.0304	0.0251
3586	0.0393	0.0335	0.0304	0.0251
3584	0.0394	0.0335	0.0304	0.0252
3582	0.0394	0.0335	0.0305	0.0252
3580	0.0395	0.0336	0.0305	0.0252
3578	0.0395	0.0336	0.0305	0.0252
3576	0.0396	0.0336	0.0306	0.0252
3574	0.0396	0.0336	0.0306	0.0253
3572	0.0397	0.0337	0.0306	0.0253
3570	0.0397	0.0337	0.0306	0.0253
3568	0.0398	0.0337	0.0307	0.0253
3566	0.0398	0.0338	0.0307	0.0253
3564	0.0399	0.0338	0.0307	0.0254
3562	0.0399	0.0338	0.0308	0.0254
3560	0.0399	0.0339	0.0308	0.0254
3558	0.04	0.0339	0.0308	0.0254
3556	0.04	0.0339	0.0309	0.0255
3554	0.0401	0.034	0.0309	0.0255
3552	0.0401	0.034	0.0309	0.0255
3550	0.0402	0.034	0.031	0.0255
3548	0.0402	0.0341	0.031	0.0256
3546	0.0403	0.0341	0.031	0.0256
3544	0.0403	0.0341	0.0311	0.0256
3542	0.0404	0.0342	0.0311	0.0256
3540	0.0404	0.0342	0.0311	0.0256
3538	0.0405	0.0342	0.0312	0.0257
3536	0.0405	0.0343	0.0312	0.0257
3534	0.0405	0.0343	0.0312	0.0257
3532	0.0406	0.0343	0.0313	0.0257
3530	0.0406	0.0344	0.0313	0.0257
3528	0.0407	0.0344	0.0313	0.0258
3526	0.0407	0.0344	0.0314	0.0258
3524	0.0407	0.0344	0.0314	0.0258
3522	0.0408	0.0345	0.0314	0.0258
3520	0.0408	0.0345	0.0315	0.0258
3518	0.0409	0.0345	0.0315	0.0259
3516	0.0409	0.0346	0.0315	0.0259
3514	0.041	0.0346	0.0316	0.0259
3512	0.041	0.0346	0.0316	0.0259
3510	0.041	0.0347	0.0316	0.0259
3508	0.0411	0.0347	0.0316	0.0259
3506	0.0411	0.0347	0.0317	0.026
3504	0.0412	0.0348	0.0317	0.026
3502	0.0412	0.0348	0.0317	0.026
3500	0.0413	0.0348	0.0318	0.026
3498	0.0413	0.0349	0.0318	0.026
3496	0.0414	0.0349	0.0318	0.0261
3494	0.0414	0.0349	0.0319	0.0261
3492	0.0415	0.035	0.0319	0.0261
3490	0.0415	0.035	0.0319	0.0261
3488	0.0416	0.035	0.032	0.0262
3486	0.0416	0.0351	0.032	0.0262
3484	0.0417	0.0351	0.032	0.0262
3482	0.0417	0.0351	0.032	0.0262
3480	0.0418	0.0351	0.0321	0.0263
3478	0.0418	0.0352	0.0321	0.0263
3476	0.0418	0.0352	0.0321	0.0263
3474	0.0419	0.0352	0.0322	0.0263
3472	0.0419	0.0352	0.0322	0.0264
3470	0.042	0.0353	0.0322	0.0264
3468	0.042	0.0353	0.0322	0.0264
3466	0.042	0.0353	0.0323	0.0264
3464	0.042	0.0353	0.0323	0.0265
3462	0.0421	0.0353	0.0323	0.0265
3460	0.0421	0.0353	0.0323	0.0265
3458	0.0421	0.0354	0.0324	0.0265
3456	0.0421	0.0354	0.0324	0.0265
3454	0.0422	0.0354	0.0324	0.0265
3452	0.0422	0.0354	0.0324	0.0265
3450	0.0422	0.0354	0.0324	0.0266
3448	0.0422	0.0354	0.0324	0.0266
3446	0.0423	0.0355	0.0325	0.0266
3444	0.0423	0.0355	0.0325	0.0266
3442	0.0423	0.0355	0.0325	0.0266
3440	0.0423	0.0355	0.0325	0.0266
3438	0.0423	0.0355	0.0325	0.0266
3436	0.0424	0.0356	0.0325	0.0266
3434	0.0424	0.0356	0.0325	0.0266
3432	0.0424	0.0356	0.0325	0.0267
3430	0.0424	0.0356	0.0325	0.0267
3428	0.0424	0.0356	0.0325	0.0267
3426	0.0425	0.0356	0.0326	0.0267
3424	0.0425	0.0356	0.0326	0.0267
3422	0.0425	0.0356	0.0326	0.0267
3420	0.0425	0.0357	0.0326	0.0267
3418	0.0425	0.0357	0.0326	0.0267
3416	0.0425	0.0357	0.0326	0.0267
3414	0.0426	0.0357	0.0326	0.0267
3412	0.0426	0.0357	0.0326	0.0267
3410	0.0426	0.0357	0.0326	0.0267
3408	0.0426	0.0357	0.0326	0.0268
3406	0.0426	0.0357	0.0326	0.0268
3404	0.0426	0.0357	0.0326	0.0268
3402	0.0427	0.0357	0.0326	0.0268
3400	0.0427	0.0357	0.0326	0.0268
3398	0.0427	0.0358	0.0326	0.0268
3396	0.0427	0.0358	0.0326	0.0268
3394	0.0427	0.0358	0.0326	0.0268
3392	0.0428	0.0358	0.0327	0.0268
3390	0.0428	0.0358	0.0327	0.0268
3388	0.0428	0.0358	0.0327	0.0268
3386	0.0428	0.0358	0.0327	0.0268
3384	0.0428	0.0358	0.0327	0.0268
3382	0.0428	0.0358	0.0327	0.0268
3380	0.0428	0.0358	0.0327	0.0268
3378	0.0428	0.0358	0.0327	0.0268
3376	0.0428	0.0358	0.0327	0.0268
3374	0.0429	0.0358	0.0327	0.0268
3372	0.0429	0.0358	0.0327	0.0268
3370	0.0429	0.0358	0.0327	0.0268
3368	0.0429	0.0358	0.0327	0.0268
3366	0.0429	0.0358	0.0327	0.0268
3364	0.0429	0.0358	0.0326	0.0268
3362	0.0429	0.0357	0.0326	0.0268
3360	0.0429	0.0357	0.0326	0.0268
3358	0.0429	0.0357	0.0326	0.0268
3356	0.0429	0.0357	0.0326	0.0268
3354	0.0429	0.0357	0.0326	0.0268
3352	0.0429	0.0357	0.0326	0.0268
3350	0.0429	0.0357	0.0326	0.0268
3348	0.0429	0.0357	0.0326	0.0268
3346	0.0429	0.0357	0.0326	0.0268
3344	0.0429	0.0357	0.0326	0.0268
3342	0.0429	0.0357	0.0326	0.0268
3340	0.0429	0.0357	0.0326	0.0267
3338	0.0429	0.0357	0.0326	0.0267
3336	0.0429	0.0357	0.0325	0.0267
3334	0.0429	0.0357	0.0325	0.0267
3332	0.0429	0.0357	0.0325	0.0267
3330	0.0429	0.0357	0.0325	0.0267
3328	0.0429	0.0357	0.0325	0.0267
3326	0.0429	0.0357	0.0325	0.0267
3324	0.0429	0.0356	0.0325	0.0267
3322	0.0428	0.0356	0.0325	0.0267
3320	0.0428	0.0356	0.0325	0.0267
3318	0.0428	0.0356	0.0325	0.0267
3316	0.0428	0.0356	0.0325	0.0267
3314	0.0428	0.0356	0.0324	0.0266
3312	0.0428	0.0356	0.0324	0.0266
3310	0.0427	0.0356	0.0324	0.0266
3308	0.0427	0.0356	0.0324	0.0266
3306	0.0427	0.0356	0.0324	0.0266
3304	0.0427	0.0356	0.0324	0.0266
3302	0.0426	0.0356	0.0324	0.0266
3300	0.0426	0.0355	0.0324	0.0266
3298	0.0426	0.0355	0.0324	0.0266
3296	0.0425	0.0355	0.0324	0.0265
3294	0.0425	0.0355	0.0324	0.0265
3292	0.0425	0.0355	0.0323	0.0265
3290	0.0424	0.0355	0.0323	0.0265
3288	0.0424	0.0355	0.0323	0.0265
3286	0.0424	0.0355	0.0323	0.0265
3284	0.0423	0.0355	0.0323	0.0265
3282	0.0423	0.0355	0.0323	0.0265
3280	0.0423	0.0355	0.0323	0.0265
3278	0.0422	0.0355	0.0323	0.0265
3276	0.0422	0.0355	0.0323	0.0265
3274	0.0421	0.0355	0.0323	0.0265
3272	0.0421	0.0355	0.0323	0.0265
3270	0.0421	0.0355	0.0322	0.0265
3268	0.042	0.0355	0.0322	0.0265
3266	0.042	0.0355	0.0322	0.0265
3264	0.042	0.0355	0.0322	0.0265
3262	0.0419	0.0355	0.0322	0.0265
3260	0.0419	0.0355	0.0322	0.0265
3258	0.0419	0.0355	0.0322	0.0265
3256	0.0418	0.0355	0.0322	0.0265
3254	0.0418	0.0355	0.0322	0.0265
3252	0.0418	0.0355	0.0322	0.0264
3250	0.0418	0.0355	0.0322	0.0264
3248	0.0417	0.0355	0.0322	0.0264
3246	0.0417	0.0355	0.0322	0.0264
3244	0.0417	0.0355	0.0322	0.0264
3242	0.0416	0.0355	0.0322	0.0264
3240	0.0416	0.0355	0.0322	0.0264
3238	0.0416	0.0355	0.0322	0.0264
3236	0.0415	0.0355	0.0322	0.0264
3234	0.0415	0.0355	0.0321	0.0264
3232	0.0415	0.0355	0.0321	0.0263
3230	0.0415	0.0355	0.0321	0.0263
3228	0.0414	0.0355	0.0321	0.0263
3226	0.0414	0.0355	0.0321	0.0263
3224	0.0414	0.0355	0.0321	0.0263
3222	0.0414	0.0355	0.0321	0.0263
3220	0.0413	0.0355	0.0321	0.0263
3218	0.0413	0.0355	0.0321	0.0263
3216	0.0413	0.0355	0.0321	0.0263
3214	0.0413	0.0355	0.0321	0.0263
3212	0.0412	0.0355	0.032	0.0263
3210	0.0412	0.0355	0.032	0.0262
3208	0.0412	0.0355	0.032	0.0262
3206	0.0412	0.0355	0.032	0.0262
3204	0.0411	0.0355	0.032	0.0262
3202	0.0411	0.0355	0.032	0.0262
3200	0.0411	0.0355	0.032	0.0262
3198	0.0411	0.0355	0.032	0.0262
3196	0.0411	0.0355	0.032	0.0262
3194	0.041	0.0354	0.0319	0.0262
3192	0.041	0.0354	0.0319	0.0262
3190	0.041	0.0354	0.0319	0.0261
3188	0.041	0.0354	0.0319	0.0261
3186	0.0409	0.0354	0.0319	0.0261
3184	0.0409	0.0354	0.0319	0.0261
3182	0.0409	0.0354	0.0319	0.0261
3180	0.0409	0.0354	0.0319	0.0261
3178	0.0408	0.0354	0.0318	0.0261
3176	0.0408	0.0354	0.0318	0.0261
3174	0.0408	0.0353	0.0318	0.0261
3172	0.0408	0.0353	0.0318	0.0261
3170	0.0407	0.0353	0.0318	0.026
3168	0.0407	0.0353	0.0318	0.026
3166	0.0407	0.0353	0.0318	0.026
3164	0.0407	0.0353	0.0318	0.026
3162	0.0407	0.0353	0.0318	0.026
3160	0.0406	0.0353	0.0317	0.026
3158	0.0406	0.0353	0.0317	0.026
3156	0.0406	0.0353	0.0317	0.026
3154	0.0406	0.0353	0.0317	0.026
3152	0.0406	0.0353	0.0317	0.026
3150	0.0405	0.0353	0.0317	0.026
3148	0.0405	0.0353	0.0317	0.026
3146	0.0405	0.0353	0.0316	0.026
3144	0.0405	0.0353	0.0316	0.026
3142	0.0405	0.0353	0.0316	0.0259
3140	0.0404	0.0353	0.0316	0.0259
3138	0.0404	0.0353	0.0316	0.0259
3136	0.0404	0.0352	0.0316	0.0259
3134	0.0404	0.0352	0.0316	0.0259
3132	0.0404	0.0352	0.0316	0.0259
3130	0.0404	0.0352	0.0315	0.0259
3128	0.0403	0.0352	0.0315	0.0259
3126	0.0403	0.0352	0.0315	0.0259
3124	0.0403	0.0352	0.0315	0.0259
3122	0.0403	0.0352	0.0315	0.0258
3120	0.0403	0.0352	0.0315	0.0258
3118	0.0402	0.0352	0.0315	0.0258
3116	0.0402	0.0352	0.0314	0.0258
3114	0.0402	0.0352	0.0314	0.0258
3112	0.0402	0.0352	0.0314	0.0258
3110	0.0402	0.0352	0.0314	0.0258
3108	0.0401	0.0352	0.0314	0.0258
3106	0.0401	0.0351	0.0314	0.0258
3104	0.0401	0.0351	0.0314	0.0258
3102	0.0401	0.0351	0.0314	0.0258
3100	0.0401	0.0351	0.0314	0.0258
3098	0.0401	0.0351	0.0314	0.0258
3096	0.0401	0.0351	0.0314	0.0258
3094	0.0401	0.0351	0.0313	0.0258
3092	0.0401	0.0351	0.0313	0.0257
3090	0.04	0.0351	0.0313	0.0257
3088	0.04	0.0351	0.0313	0.0257
3086	0.04	0.0351	0.0313	0.0257
3084	0.04	0.0351	0.0313	0.0257
3082	0.04	0.0352	0.0313	0.0257
3080	0.04	0.0352	0.0313	0.0257
3078	0.04	0.0352	0.0313	0.0257
3076	0.04	0.0352	0.0313	0.0257
3074	0.04	0.0352	0.0313	0.0257
3072	0.04	0.0352	0.0313	0.0257
3070	0.04	0.0352	0.0313	0.0257
3068	0.04	0.0352	0.0313	0.0257
3066	0.04	0.0352	0.0313	0.0257
3064	0.04	0.0352	0.0313	0.0257
3062	0.04	0.0352	0.0313	0.0257
3060	0.04	0.0352	0.0313	0.0257
3058	0.04	0.0352	0.0313	0.0257
3056	0.04	0.0352	0.0313	0.0257
3054	0.04	0.0352	0.0313	0.0257
3052	0.04	0.0352	0.0313	0.0257
3050	0.04	0.0352	0.0312	0.0257
3048	0.0399	0.0352	0.0312	0.0257
3046	0.0399	0.0352	0.0312	0.0257
3044	0.0399	0.0352	0.0312	0.0257
3042	0.0399	0.0352	0.0312	0.0257
3040	0.0399	0.0352	0.0312	0.0257
3038	0.0399	0.0352	0.0312	0.0257
3036	0.0399	0.0352	0.0312	0.0257
3034	0.0399	0.0352	0.0312	0.0256
3032	0.0399	0.0352	0.0312	0.0256
3030	0.0399	0.0352	0.0311	0.0256
3028	0.0398	0.0352	0.0311	0.0256
3026	0.0398	0.0352	0.0311	0.0255
3024	0.0398	0.0351	0.031	0.0255
3022	0.0398	0.0351	0.031	0.0255
3020	0.0397	0.0351	0.031	0.0254
3018	0.0397	0.0351	0.0309	0.0253
3016	0.0397	0.0351	0.0308	0.0253
3014	0.0396	0.0351	0.0308	0.0252
3012	0.0396	0.035	0.0307	0.0251
3010	0.0396	0.035	0.0306	0.025
3008	0.0395	0.035	0.0306	0.0249
3006	0.0395	0.035	0.0305	0.0248
3004	0.0394	0.035	0.0304	0.0247
3002	0.0394	0.0349	0.0303	0.0246
3000	0.0393	0.0349	0.0302	0.0245
2998	0.0393	0.0349	0.0301	0.0244
2996	0.0392	0.0349	0.03	0.0243
2994	0.0391	0.0348	0.0299	0.0242
2992	0.0391	0.0348	0.0298	0.024
2990	0.039	0.0348	0.0297	0.0239
2988	0.039	0.0348	0.0296	0.0238
2986	0.0389	0.0348	0.0295	0.0237
2984	0.0389	0.0347	0.0294	0.0237
2982	0.0388	0.0347	0.0294	0.0236
2980	0.0388	0.0347	0.0293	0.0235
2978	0.0387	0.0347	0.0293	0.0235
2976	0.0387	0.0347	0.0292	0.0235
2974	0.0387	0.0347	0.0292	0.0234
2972	0.0386	0.0347	0.0291	0.0234
2970	0.0386	0.0347	0.0291	0.0234
2968	0.0386	0.0348	0.0291	0.0234
2966	0.0385	0.0348	0.0291	0.0234
2964	0.0385	0.0348	0.029	0.0234
2962	0.0385	0.0348	0.029	0.0234
2960	0.0384	0.0348	0.029	0.0234
2958	0.0384	0.0348	0.029	0.0235
2956	0.0384	0.0348	0.029	0.0235
2954	0.0384	0.0349	0.029	0.0235
2952	0.0383	0.0349	0.029	0.0235
2950	0.0383	0.0349	0.0289	0.0234
2948	0.0382	0.0349	0.0289	0.0234
2946	0.0381	0.0349	0.0288	0.0233
2944	0.038	0.0349	0.0287	0.0232
2942	0.0379	0.0349	0.0286	0.0231
2940	0.0378	0.0349	0.0284	0.0229
2938	0.0376	0.035	0.0282	0.0227
2936	0.0374	0.035	0.028	0.0225
2934	0.0372	0.035	0.0278	0.0222
2932	0.037	0.035	0.0275	0.022
2930	0.0368	0.035	0.0272	0.0217
2928	0.0365	0.035	0.027	0.0214
2926	0.0363	0.035	0.0267	0.0212
2924	0.0361	0.035	0.0265	0.0209
2922	0.0359	0.035	0.0263	0.0207
2920	0.0358	0.035	0.0261	0.0206
2918	0.0357	0.035	0.026	0.0204
2916	0.0356	0.0351	0.0259	0.0204
2914	0.0356	0.0351	0.0259	0.0204
2912	0.0357	0.0351	0.026	0.0204
2910	0.0357	0.0351	0.0261	0.0205
2908	0.0358	0.0351	0.0262	0.0207
2906	0.036	0.0351	0.0264	0.0209
2904	0.0362	0.0351	0.0266	0.0211
2902	0.0364	0.0351	0.0269	0.0213
2900	0.0366	0.0352	0.0271	0.0216
2898	0.0368	0.0352	0.0274	0.0218
2896	0.037	0.0352	0.0276	0.0221
2894	0.0372	0.0352	0.0279	0.0224
2892	0.0374	0.0352	0.0281	0.0226
2890	0.0376	0.0352	0.0283	0.0228
2888	0.0377	0.0352	0.0285	0.023
2886	0.0379	0.0352	0.0287	0.0232
2884	0.038	0.0352	0.0288	0.0233
2882	0.0381	0.0352	0.0289	0.0234
2880	0.0382	0.0352	0.029	0.0235
2878	0.0382	0.0352	0.0291	0.0236
2876	0.0382	0.0352	0.0291	0.0236
2874	0.0382	0.0352	0.0291	0.0236
2872	0.0382	0.0352	0.029	0.0235
2870	0.0381	0.0352	0.029	0.0235
2868	0.038	0.0352	0.0289	0.0234
2866	0.0379	0.0352	0.0288	0.0233
2864	0.0378	0.0352	0.0287	0.0232
2862	0.0377	0.0352	0.0285	0.0231
2860	0.0376	0.0352	0.0284	0.023
2858	0.0375	0.0352	0.0283	0.0229
2856	0.0374	0.0352	0.0282	0.0228
2854	0.0374	0.0352	0.0282	0.0227
2852	0.0374	0.0352	0.0282	0.0227
2850	0.0374	0.0352	0.0282	0.0228
2848	0.0374	0.0352	0.0282	0.0228
2846	0.0375	0.0352	0.0283	0.0229
2844	0.0376	0.0352	0.0284	0.0231
2842	0.0377	0.0352	0.0286	0.0232
2840	0.0378	0.0352	0.0288	0.0234
2838	0.038	0.0352	0.029	0.0237
2836	0.0382	0.0353	0.0292	0.0239
2834	0.0384	0.0353	0.0294	0.0241
2832	0.0385	0.0353	0.0297	0.0243
2830	0.0387	0.0353	0.0299	0.0246
2828	0.0389	0.0353	0.0301	0.0248
2826	0.039	0.0353	0.0302	0.0249
2824	0.0391	0.0353	0.0304	0.0251
2822	0.0393	0.0352	0.0305	0.0252
2820	0.0393	0.0352	0.0306	0.0253
2818	0.0394	0.0352	0.0307	0.0254
2816	0.0395	0.0352	0.0308	0.0255
2814	0.0395	0.0352	0.0308	0.0255
2812	0.0396	0.0352	0.0309	0.0256
2810	0.0396	0.0352	0.0309	0.0256
2808	0.0396	0.0352	0.0309	0.0256
2806	0.0396	0.0352	0.0309	0.0257
2804	0.0396	0.0352	0.0309	0.0257
2802	0.0396	0.0352	0.031	0.0257
2800	0.0397	0.0351	0.031	0.0257
2798	0.0397	0.0351	0.031	0.0257
2796	0.0397	0.0351	0.031	0.0258
2794	0.0397	0.0351	0.031	0.0258
2792	0.0397	0.0351	0.031	0.0258
2790	0.0397	0.0351	0.031	0.0258
2788	0.0397	0.0351	0.031	0.0258
2786	0.0397	0.0351	0.031	0.0258
2784	0.0397	0.0351	0.031	0.0258
2782	0.0397	0.0351	0.031	0.0258
2780	0.0397	0.0351	0.031	0.0258
2778	0.0397	0.035	0.031	0.0258
2776	0.0397	0.035	0.031	0.0258
2774	0.0397	0.035	0.031	0.0258
2772	0.0397	0.035	0.031	0.0258
2770	0.0397	0.035	0.031	0.0258
2768	0.0397	0.035	0.031	0.0259
2766	0.0397	0.035	0.0311	0.0259
2764	0.0397	0.035	0.0311	0.0259
2762	0.0397	0.035	0.0311	0.0259
2760	0.0397	0.035	0.0311	0.0259
2758	0.0397	0.035	0.0311	0.0259
2756	0.0397	0.035	0.0311	0.0259
2754	0.0397	0.035	0.0311	0.0259
2752	0.0397	0.035	0.0311	0.0259
2750	0.0397	0.035	0.0311	0.0259
2748	0.0397	0.035	0.0311	0.0259
2746	0.0398	0.035	0.0311	0.0259
2744	0.0398	0.035	0.0311	0.0259
2742	0.0398	0.035	0.0311	0.0259
2740	0.0398	0.035	0.0311	0.0259
2738	0.0398	0.035	0.0311	0.0259
2736	0.0398	0.035	0.0311	0.0259
2734	0.0398	0.035	0.0311	0.0259
2732	0.0398	0.035	0.0311	0.0259
2730	0.0398	0.035	0.0311	0.0259
2728	0.0398	0.035	0.0311	0.0259
2726	0.0398	0.035	0.0311	0.0259
2724	0.0398	0.035	0.0311	0.0259
2722	0.0398	0.035	0.0311	0.0259
2720	0.0398	0.035	0.0311	0.0259
2718	0.0398	0.035	0.0311	0.0259
2716	0.0397	0.035	0.0311	0.0259
2714	0.0397	0.0349	0.0311	0.0259
2712	0.0397	0.0349	0.0311	0.0259
2710	0.0397	0.0349	0.0311	0.0259
2708	0.0397	0.0349	0.0311	0.0259
2706	0.0397	0.0349	0.0311	0.0259
2704	0.0398	0.0349	0.0311	0.0259
2702	0.0398	0.0349	0.0311	0.0259
2700	0.0398	0.0349	0.0311	0.0259
2698	0.0398	0.0349	0.0311	0.0259
2696	0.0398	0.0349	0.031	0.0259
2694	0.0397	0.0349	0.031	0.0259
2692	0.0397	0.0349	0.031	0.0259
2690	0.0397	0.0349	0.031	0.0259
2688	0.0397	0.0349	0.031	0.0259
2686	0.0397	0.0349	0.031	0.0259
2684	0.0397	0.0349	0.031	0.0259
2682	0.0397	0.0349	0.031	0.0259
2680	0.0397	0.0349	0.031	0.0259
2678	0.0397	0.0349	0.031	0.0259
2676	0.0398	0.035	0.031	0.0259
2674	0.0398	0.035	0.031	0.026
2672	0.0398	0.035	0.0311	0.026
2670	0.0398	0.035	0.0311	0.026
2668	0.0398	0.035	0.0311	0.026
2666	0.0398	0.035	0.0311	0.026
2664	0.0398	0.035	0.0311	0.026
2662	0.0398	0.035	0.0311	0.026
2660	0.0398	0.035	0.0311	0.026
2658	0.0398	0.0351	0.0311	0.026
2656	0.0398	0.0351	0.0311	0.026
2654	0.0398	0.0351	0.0311	0.026
2652	0.0398	0.0351	0.0311	0.026
2650	0.0398	0.0351	0.0311	0.026
2648	0.0398	0.0351	0.0311	0.026
2646	0.0398	0.0351	0.0311	0.026
2644	0.0398	0.035	0.0311	0.026
2642	0.0397	0.035	0.0311	0.026
2640	0.0397	0.035	0.0311	0.026
2638	0.0397	0.035	0.0311	0.026
2636	0.0397	0.035	0.031	0.026
2634	0.0397	0.035	0.031	0.026
2632	0.0396	0.0349	0.031	0.0259
2630	0.0396	0.0349	0.031	0.0259
2628	0.0396	0.0349	0.0309	0.0259
2626	0.0396	0.0349	0.0309	0.0259
2624	0.0395	0.0348	0.0309	0.0258
2622	0.0395	0.0348	0.0309	0.0258
2620	0.0395	0.0348	0.0308	0.0258
2618	0.0395	0.0348	0.0308	0.0258
2616	0.0395	0.0347	0.0308	0.0258
2614	0.0394	0.0347	0.0308	0.0258
2612	0.0394	0.0347	0.0308	0.0257
2610	0.0394	0.0347	0.0308	0.0257
2608	0.0394	0.0346	0.0307	0.0257
2606	0.0394	0.0346	0.0307	0.0257
2604	0.0394	0.0346	0.0307	0.0257
2602	0.0393	0.0346	0.0307	0.0257
2600	0.0393	0.0345	0.0307	0.0257
2598	0.0393	0.0345	0.0307	0.0256
2596	0.0393	0.0345	0.0307	0.0256
2594	0.0393	0.0345	0.0307	0.0256
2592	0.0393	0.0345	0.0306	0.0256
2590	0.0393	0.0344	0.0306	0.0256
2588	0.0392	0.0344	0.0306	0.0256
2586	0.0392	0.0344	0.0306	0.0256
2584	0.0392	0.0344	0.0306	0.0255
2582	0.0392	0.0344	0.0306	0.0255
2580	0.0392	0.0344	0.0306	0.0255
2578	0.0392	0.0343	0.0306	0.0255
2576	0.0392	0.0343	0.0306	0.0255
2574	0.0392	0.0343	0.0306	0.0255
2572	0.0392	0.0343	0.0306	0.0255
2570	0.0392	0.0343	0.0305	0.0255
2568	0.0392	0.0343	0.0305	0.0255
2566	0.0391	0.0343	0.0305	0.0254
2564	0.0391	0.0343	0.0305	0.0254
2562	0.0391	0.0342	0.0305	0.0254
2560	0.0391	0.0342	0.0305	0.0254
2558	0.0391	0.0342	0.0305	0.0254
2556	0.0391	0.0342	0.0305	0.0254
2554	0.0391	0.0342	0.0305	0.0254
2552	0.0391	0.0342	0.0305	0.0254
2550	0.0391	0.0342	0.0305	0.0254
2548	0.0391	0.0342	0.0305	0.0254
2546	0.0391	0.0342	0.0305	0.0254
2544	0.0391	0.0342	0.0305	0.0254
2542	0.0391	0.0342	0.0305	0.0254
2540	0.0391	0.0341	0.0305	0.0254
2538	0.0391	0.0341	0.0305	0.0254
2536	0.0392	0.0341	0.0305	0.0254
2534	0.0392	0.0341	0.0305	0.0254
2532	0.0392	0.0341	0.0305	0.0254
2530	0.0392	0.0341	0.0305	0.0254
2528	0.0392	0.0341	0.0305	0.0254
2526	0.0392	0.0341	0.0305	0.0254
2524	0.0392	0.0341	0.0305	0.0254
2522	0.0392	0.0341	0.0305	0.0254
2520	0.0392	0.0341	0.0305	0.0254
2518	0.0392	0.0341	0.0305	0.0254
2516	0.0392	0.0341	0.0305	0.0254
2514	0.0392	0.0341	0.0305	0.0254
2512	0.0392	0.0341	0.0305	0.0255
2510	0.0392	0.0341	0.0305	0.0255
2508	0.0392	0.0341	0.0305	0.0255
2506	0.0392	0.0341	0.0305	0.0255
2504	0.0392	0.0341	0.0305	0.0255
2502	0.0392	0.0341	0.0305	0.0255
2500	0.0392	0.0341	0.0305	0.0255
2498	0.0392	0.0341	0.0305	0.0254
2496	0.0391	0.0341	0.0305	0.0254
2494	0.0391	0.0341	0.0305	0.0254
2492	0.0391	0.0341	0.0304	0.0254
2490	0.0391	0.034	0.0304	0.0254
2488	0.0391	0.034	0.0304	0.0254
2486	0.0391	0.034	0.0304	0.0254
2484	0.0391	0.034	0.0304	0.0254
2482	0.039	0.034	0.0304	0.0254
2480	0.039	0.034	0.0304	0.0254
2478	0.039	0.034	0.0304	0.0254
2476	0.039	0.034	0.0304	0.0254
2474	0.039	0.0339	0.0304	0.0254
2472	0.039	0.0339	0.0304	0.0254
2470	0.039	0.0339	0.0304	0.0254
2468	0.039	0.0339	0.0304	0.0254
2466	0.039	0.0339	0.0304	0.0254
2464	0.039	0.0339	0.0304	0.0254
2462	0.039	0.0339	0.0304	0.0254
2460	0.039	0.0339	0.0304	0.0254
2458	0.039	0.0339	0.0304	0.0254
2456	0.039	0.0339	0.0304	0.0254
2454	0.039	0.0339	0.0304	0.0254
2452	0.039	0.0339	0.0304	0.0254
2450	0.039	0.0339	0.0304	0.0254
2448	0.039	0.0339	0.0304	0.0254
2446	0.039	0.0338	0.0304	0.0254
2444	0.039	0.0338	0.0304	0.0254
2442	0.039	0.0338	0.0303	0.0254
2440	0.039	0.0338	0.0303	0.0254
2438	0.039	0.0338	0.0303	0.0254
2436	0.039	0.0337	0.0303	0.0254
2434	0.0389	0.0337	0.0303	0.0253
2432	0.0389	0.0337	0.0302	0.0253
2430	0.0389	0.0337	0.0302	0.0253
2428	0.0389	0.0337	0.0302	0.0253
2426	0.0389	0.0336	0.0302	0.0253
2424	0.0389	0.0336	0.0302	0.0253
2422	0.0388	0.0336	0.0302	0.0252
2420	0.0388	0.0336	0.0302	0.0252
2418	0.0388	0.0336	0.0301	0.0252
2416	0.0388	0.0336	0.0301	0.0252
2414	0.0388	0.0336	0.0301	0.0252
2412	0.0388	0.0335	0.0301	0.0252
2410	0.0388	0.0335	0.0301	0.0252
2408	0.0388	0.0335	0.0301	0.0252
2406	0.0388	0.0335	0.0301	0.0252
2404	0.0388	0.0335	0.0301	0.0252
2402	0.0388	0.0335	0.0301	0.0252
2400	0.0388	0.0335	0.0301	0.0252
2398	0.0388	0.0335	0.0301	0.0252
2396	0.0388	0.0335	0.0301	0.0253
2394	0.0388	0.0335	0.0301	0.0253
2392	0.0388	0.0335	0.0302	0.0253
2390	0.0388	0.0335	0.0302	0.0253
2388	0.0388	0.0335	0.0302	0.0254
2386	0.0388	0.0335	0.0303	0.0254
2384	0.0388	0.0335	0.0303	0.0254
2382	0.0388	0.0335	0.0303	0.0255
2380	0.0388	0.0335	0.0304	0.0255
2378	0.0388	0.0336	0.0304	0.0255
2376	0.0388	0.0336	0.0305	0.0255
2374	0.0388	0.0336	0.0305	0.0256
2372	0.0388	0.0336	0.0305	0.0256
2370	0.0388	0.0336	0.0306	0.0256
2368	0.0388	0.0336	0.0306	0.0255
2366	0.0388	0.0336	0.0306	0.0255
2364	0.0388	0.0335	0.0306	0.0255
2362	0.0388	0.0335	0.0306	0.0255
2360	0.0388	0.0335	0.0306	0.0255
2358	0.0388	0.0335	0.0306	0.0255
2356	0.0388	0.0335	0.0306	0.0254
2354	0.0388	0.0334	0.0306	0.0254
2352	0.0388	0.0334	0.0306	0.0254
2350	0.0389	0.0334	0.0306	0.0254
2348	0.0388	0.0334	0.0306	0.0254
2346	0.0388	0.0334	0.0305	0.0254
2344	0.0388	0.0334	0.0305	0.0254
2342	0.0388	0.0334	0.0305	0.0254
2340	0.0388	0.0334	0.0305	0.0254
2338	0.0388	0.0334	0.0305	0.0254
2336	0.0388	0.0334	0.0305	0.0254
2334	0.0388	0.0333	0.0305	0.0254
2332	0.0388	0.0333	0.0305	0.0253
2330	0.0388	0.0333	0.0305	0.0253
2328	0.0388	0.0333	0.0305	0.0253
2326	0.0388	0.0333	0.0304	0.0253
2324	0.0388	0.0332	0.0304	0.0253
2322	0.0388	0.0332	0.0304	0.0252
2320	0.0388	0.0332	0.0304	0.0252
2318	0.0388	0.0332	0.0304	0.0252
2316	0.0387	0.0332	0.0303	0.0252
2314	0.0387	0.0331	0.0303	0.0252
2312	0.0387	0.0331	0.0303	0.0252
2310	0.0387	0.0331	0.0303	0.0252
2308	0.0387	0.0331	0.0303	0.0252
2306	0.0386	0.0331	0.0303	0.0252
2304	0.0386	0.0331	0.0303	0.0252
2302	0.0386	0.0331	0.0303	0.0252
2300	0.0385	0.0331	0.0303	0.0252
2298	0.0385	0.0331	0.0302	0.0251
2296	0.0385	0.033	0.0302	0.0251
2294	0.0385	0.033	0.0302	0.0251
2292	0.0385	0.033	0.0302	0.0251
2290	0.0385	0.033	0.0302	0.0251
2288	0.0385	0.033	0.0302	0.0251
2286	0.0385	0.0329	0.0302	0.0251
2284	0.0385	0.0329	0.0301	0.0251
2282	0.0385	0.0329	0.0301	0.0251
2280	0.0385	0.0329	0.0301	0.0252
2278	0.0385	0.0329	0.0301	0.0252
2276	0.0386	0.0329	0.0301	0.0252
2274	0.0386	0.0329	0.0301	0.0252
2272	0.0386	0.0329	0.0301	0.0253
2270	0.0386	0.0329	0.0301	0.0253
2268	0.0386	0.0329	0.0301	0.0253
2266	0.0386	0.0329	0.0301	0.0253
2264	0.0386	0.0329	0.0301	0.0253
2262	0.0386	0.033	0.0301	0.0253
2260	0.0386	0.033	0.0301	0.0253
2258	0.0386	0.033	0.0301	0.0253
2256	0.0386	0.033	0.03	0.0253
2254	0.0385	0.033	0.03	0.0252
2252	0.0385	0.033	0.03	0.0252
2250	0.0385	0.033	0.03	0.0252
2248	0.0385	0.033	0.03	0.0252
2246	0.0385	0.033	0.0299	0.0252
2244	0.0384	0.033	0.0299	0.0251
2242	0.0384	0.033	0.0299	0.0251
2240	0.0384	0.033	0.0299	0.0251
2238	0.0383	0.033	0.0299	0.025
2236	0.0383	0.033	0.0299	0.025
2234	0.0383	0.033	0.0299	0.025
2232	0.0383	0.033	0.0299	0.025
2230	0.0383	0.033	0.0298	0.025
2228	0.0382	0.033	0.0298	0.025
2226	0.0382	0.033	0.0298	0.025
2224	0.0382	0.033	0.0298	0.025
2222	0.0382	0.033	0.0298	0.025
2220	0.0382	0.033	0.0298	0.025
2218	0.0381	0.0329	0.0298	0.025
2216	0.0381	0.0329	0.0298	0.0249
2214	0.0381	0.0329	0.0298	0.0249
2212	0.0381	0.0329	0.0297	0.0249
2210	0.038	0.0328	0.0297	0.0249
2208	0.038	0.0328	0.0297	0.0249
2206	0.038	0.0328	0.0297	0.0249
2204	0.0379	0.0328	0.0296	0.0249
2202	0.0379	0.0328	0.0296	0.0249
2200	0.0379	0.0327	0.0296	0.0249
2198	0.0379	0.0327	0.0296	0.0248
2196	0.0379	0.0327	0.0296	0.0248
2194	0.0378	0.0327	0.0295	0.0248
2192	0.0378	0.0327	0.0295	0.0248
2190	0.0378	0.0326	0.0295	0.0248
2188	0.0378	0.0326	0.0294	0.0247
2186	0.0378	0.0326	0.0294	0.0247
2184	0.0377	0.0325	0.0293	0.0246
2182	0.0377	0.0325	0.0293	0.0246
2180	0.0376	0.0324	0.0292	0.0245
2178	0.0376	0.0324	0.0291	0.0245
2176	0.0375	0.0323	0.029	0.0244
2174	0.0375	0.0322	0.0289	0.0244
2172	0.0374	0.0321	0.0288	0.0243
2170	0.0373	0.032	0.0287	0.0242
2168	0.0372	0.0319	0.0286	0.0241
2166	0.0371	0.0318	0.0285	0.024
2164	0.037	0.0316	0.0283	0.0239
2162	0.0369	0.0315	0.0282	0.0238
2160	0.0368	0.0314	0.0281	0.0237
2158	0.0367	0.0312	0.028	0.0236
2156	0.0366	0.0311	0.0279	0.0235
2154	0.0365	0.031	0.0278	0.0234
2152	0.0364	0.0309	0.0277	0.0234
2150	0.0363	0.0308	0.0277	0.0233
2148	0.0363	0.0308	0.0276	0.0232
2146	0.0363	0.0307	0.0276	0.0232
2144	0.0362	0.0307	0.0276	0.0232
2142	0.0363	0.0307	0.0277	0.0232
2140	0.0363	0.0308	0.0277	0.0232
2138	0.0363	0.0308	0.0278	0.0232
2136	0.0364	0.0309	0.0278	0.0232
2134	0.0365	0.0309	0.0279	0.0233
2132	0.0365	0.031	0.028	0.0234
2130	0.0366	0.0311	0.0281	0.0234
2128	0.0367	0.0312	0.0282	0.0235
2126	0.0368	0.0312	0.0283	0.0236
2124	0.0368	0.0313	0.0284	0.0236
2122	0.0369	0.0314	0.0284	0.0237
2120	0.037	0.0314	0.0285	0.0237
2118	0.037	0.0315	0.0286	0.0238
2116	0.037	0.0315	0.0286	0.0238
2114	0.0371	0.0316	0.0287	0.0239
2112	0.0371	0.0316	0.0287	0.0239
2110	0.0371	0.0316	0.0287	0.0239
2108	0.0371	0.0316	0.0288	0.024
2106	0.0372	0.0316	0.0288	0.024
2104	0.0372	0.0317	0.0288	0.024
2102	0.0372	0.0317	0.0288	0.024
2100	0.0372	0.0317	0.0288	0.0241
2098	0.0372	0.0317	0.0288	0.0241
2096	0.0372	0.0316	0.0288	0.0241
2094	0.0372	0.0316	0.0287	0.0241
2092	0.0371	0.0316	0.0287	0.0241
2090	0.0371	0.0316	0.0287	0.0241
2088	0.0371	0.0316	0.0287	0.0241
2086	0.0371	0.0316	0.0286	0.024
2084	0.0371	0.0315	0.0286	0.024
2082	0.037	0.0315	0.0286	0.024
2080	0.037	0.0315	0.0285	0.024
2078	0.037	0.0315	0.0285	0.024
2076	0.037	0.0314	0.0285	0.024
2074	0.0369	0.0314	0.0285	0.024
2072	0.0369	0.0314	0.0285	0.0239
2070	0.0369	0.0314	0.0284	0.0239
2068	0.0369	0.0314	0.0284	0.0239
2066	0.0369	0.0313	0.0284	0.0239
2064	0.0368	0.0313	0.0284	0.0239
2062	0.0368	0.0313	0.0284	0.0238
2060	0.0368	0.0312	0.0284	0.0238
2058	0.0367	0.0312	0.0283	0.0238
2056	0.0367	0.0311	0.0283	0.0237
2054	0.0366	0.0311	0.0282	0.0237
2052	0.0366	0.031	0.0282	0.0237
2050	0.0365	0.0309	0.0281	0.0236
2048	0.0364	0.0308	0.0281	0.0235
2046	0.0363	0.0307	0.028	0.0235
2044	0.0363	0.0306	0.0279	0.0234
2042	0.0362	0.0305	0.0278	0.0233
2040	0.0361	0.0304	0.0277	0.0232
2038	0.036	0.0303	0.0276	0.0231
2036	0.036	0.0302	0.0275	0.023
2034	0.0359	0.0301	0.0274	0.0229
2032	0.0358	0.03	0.0272	0.0228
2030	0.0357	0.0299	0.0271	0.0227
2028	0.0356	0.0298	0.027	0.0226
2026	0.0355	0.0297	0.027	0.0225
2024	0.0354	0.0296	0.0269	0.0224
2022	0.0354	0.0296	0.0268	0.0223
2020	0.0353	0.0295	0.0268	0.0223
2018	0.0352	0.0295	0.0267	0.0222
2016	0.0352	0.0295	0.0267	0.0222
2014	0.0352	0.0294	0.0267	0.0222
2012	0.0351	0.0295	0.0267	0.0222
2010	0.0351	0.0295	0.0268	0.0222
2008	0.0352	0.0295	0.0268	0.0223
2006	0.0352	0.0296	0.0268	0.0223
2004	0.0352	0.0296	0.0269	0.0224
2002	0.0353	0.0297	0.027	0.0224
2000	0.0354	0.0297	0.027	0.0225
1998	0.0354	0.0298	0.0271	0.0225
1996	0.0355	0.0298	0.0271	0.0226
1994	0.0355	0.0298	0.0272	0.0226
1992	0.0356	0.0298	0.0272	0.0226
1990	0.0356	0.0298	0.0272	0.0226
1988	0.0356	0.0298	0.0272	0.0226
1986	0.0356	0.0298	0.0271	0.0226
1984	0.0356	0.0298	0.0271	0.0226
1982	0.0356	0.0297	0.0271	0.0225
1980	0.0356	0.0296	0.027	0.0225
1978	0.0356	0.0296	0.0269	0.0225
1976	0.0355	0.0295	0.0269	0.0224
1974	0.0355	0.0294	0.0268	0.0224
1972	0.0355	0.0294	0.0268	0.0223
1970	0.0355	0.0293	0.0267	0.0222
1968	0.0354	0.0293	0.0267	0.0222
1966	0.0354	0.0293	0.0266	0.0222
1964	0.0354	0.0293	0.0266	0.0221
1962	0.0354	0.0293	0.0266	0.0221
1960	0.0354	0.0293	0.0267	0.0221
1958	0.0354	0.0294	0.0267	0.0221
1956	0.0354	0.0295	0.0268	0.0221
1954	0.0355	0.0295	0.0268	0.0221
1952	0.0355	0.0296	0.0269	0.0221
1950	0.0355	0.0297	0.027	0.0222
1948	0.0356	0.0298	0.0271	0.0222
1946	0.0356	0.0299	0.0272	0.0223
1944	0.0356	0.03	0.0273	0.0224
1942	0.0356	0.0301	0.0273	0.0224
1940	0.0357	0.0301	0.0274	0.0225
1938	0.0357	0.0302	0.0275	0.0226
1936	0.0358	0.0303	0.0275	0.0227
1934	0.0359	0.0303	0.0276	0.0228
1932	0.036	0.0304	0.0276	0.0229
1930	0.036	0.0304	0.0277	0.023
1928	0.0361	0.0304	0.0277	0.0231
1926	0.0361	0.0305	0.0278	0.0231
1924	0.0362	0.0305	0.0278	0.0232
1922	0.0363	0.0305	0.0278	0.0232
1920	0.0364	0.0305	0.0278	0.0233
1918	0.0365	0.0305	0.0278	0.0233
1916	0.0367	0.0304	0.0278	0.0233
1914	0.0367	0.0305	0.0278	0.0233
1912	0.0366	0.0305	0.0279	0.0233
1910	0.0364	0.0305	0.0279	0.0233
1908	0.0361	0.0305	0.0279	0.0233
1906	0.0358	0.0305	0.0279	0.0233
1904	0.0355	0.0305	0.0278	0.0233
1902	0.0354	0.0305	0.0276	0.0233
1900	0.0354	0.0305	0.0275	0.0233
1898	0.0354	0.0306	0.0274	0.0233
1896	0.0355	0.0307	0.0273	0.0233
1894	0.0355	0.0309	0.0272	0.0233
1892	0.0356	0.0309	0.0272	0.0233
1890	0.0355	0.0309	0.0273	0.0233
1888	0.0355	0.0309	0.0273	0.0233
1886	0.0355	0.0307	0.0273	0.0232
1884	0.0355	0.0304	0.0273	0.0231
1882	0.0355	0.0302	0.0273	0.023
1880	0.0355	0.0301	0.0273	0.0229
1878	0.0355	0.03	0.0273	0.0229
1876	0.0355	0.03	0.0273	0.0228
1874	0.0355	0.0301	0.0273	0.0228
1872	0.0355	0.0301	0.0273	0.0229
1870	0.0355	0.0302	0.0273	0.0229
1868	0.0354	0.0302	0.0273	0.0229
1866	0.0354	0.0301	0.0273	0.0229
1864	0.0354	0.0301	0.0273	0.0229
1862	0.0354	0.03	0.0273	0.0229
1860	0.0354	0.03	0.0273	0.0228
1858	0.0354	0.03	0.0273	0.0228
1856	0.0354	0.0301	0.0273	0.0228
1854	0.0354	0.0301	0.0273	0.0229
1852	0.0354	0.0301	0.0273	0.0231
1850	0.0354	0.03	0.0273	0.0232
1848	0.0354	0.03	0.0273	0.0234
1846	0.0354	0.03	0.0273	0.0235
1844	0.0353	0.03	0.0273	0.0236
1842	0.0353	0.03	0.0273	0.0237
1840	0.0354	0.03	0.0273	0.0237
1838	0.0354	0.03	0.0273	0.0237
1836	0.0354	0.03	0.0273	0.0237
1834	0.0354	0.03	0.0273	0.0236
1832	0.0354	0.03	0.0273	0.0236
1830	0.0353	0.03	0.0273	0.0236
1828	0.0353	0.03	0.0273	0.0235
1826	0.0353	0.03	0.0273	0.0235
1824	0.0353	0.03	0.0273	0.0235
1822	0.0354	0.03	0.0273	0.0235
1820	0.0355	0.03	0.0273	0.0235
1818	0.0355	0.0301	0.0274	0.0235
1816	0.0354	0.0301	0.0274	0.0236
1814	0.0353	0.0301	0.0274	0.0236
1812	0.0353	0.0302	0.0274	0.0237
1810	0.0353	0.0302	0.0275	0.0238
1808	0.0354	0.0302	0.0276	0.0238
1806	0.0358	0.0303	0.0277	0.0239
1804	0.0362	0.0303	0.0279	0.0239
1802	0.0366	0.0303	0.0281	0.024
1800	0.037	0.0304	0.0284	0.024
1798	0.0373	0.0304	0.0286	0.024
1796	0.0374	0.0304	0.0288	0.0241
1794	0.0374	0.0304	0.0289	0.0241
1792	0.0373	0.0304	0.0291	0.0242
1790	0.0372	0.0304	0.0291	0.0242
1788	0.0372	0.0304	0.0292	0.0242
1786	0.0373	0.0304	0.0292	0.0243
1784	0.0373	0.0304	0.0292	0.0244
1782	0.0375	0.0303	0.0292	0.0245
1780	0.0376	0.0303	0.0291	0.0245
1778	0.0378	0.0303	0.0291	0.0246
1776	0.038	0.0303	0.029	0.0247
1774	0.0382	0.0303	0.029	0.0247
1772	0.0384	0.0302	0.0289	0.0248
1770	0.0387	0.0302	0.0289	0.0249
1768	0.039	0.0302	0.0288	0.0249
1766	0.0393	0.0302	0.0288	0.025
1764	0.0396	0.0302	0.0287	0.0251
1762	0.0399	0.0302	0.0287	0.0251
1760	0.0402	0.0301	0.0287	0.0252
1758	0.0404	0.0301	0.0286	0.0253
1756	0.0407	0.0301	0.0286	0.0253
1754	0.0409	0.0301	0.0286	0.0254
1752	0.041	0.0302	0.0286	0.0255
1750	0.0412	0.0302	0.0286	0.0256
1748	0.0413	0.0302	0.0287	0.0256
1746	0.0413	0.0302	0.0288	0.0257
1744	0.0414	0.0302	0.0289	0.0258
1742	0.0414	0.0302	0.0291	0.0258
1740	0.0413	0.0302	0.0292	0.0259
1738	0.0413	0.0303	0.0294	0.0259
1736	0.0412	0.0303	0.0296	0.0259
1734	0.0412	0.0303	0.0298	0.0258
1732	0.0411	0.0303	0.0299	0.0257
1730	0.041	0.0304	0.0301	0.0256
1728	0.041	0.0304	0.0302	0.0255
1726	0.0409	0.0304	0.0303	0.0254
1724	0.0409	0.0305	0.0303	0.0252
1722	0.0409	0.0305	0.0303	0.0251
1720	0.0409	0.0306	0.0303	0.0249
1718	0.0409	0.0306	0.0303	0.0248
1716	0.0409	0.0307	0.0303	0.0247
1714	0.041	0.0307	0.0303	0.0246
1712	0.0411	0.0308	0.0303	0.0246
1710	0.0412	0.0308	0.0303	0.0246
1708	0.0413	0.0309	0.0302	0.0246
1706	0.0414	0.031	0.0302	0.0246
1704	0.0414	0.0311	0.0302	0.0247
1702	0.0415	0.0311	0.0303	0.0248
1700	0.0416	0.0312	0.0303	0.025
1698	0.0416	0.0313	0.0304	0.0251
1696	0.0417	0.0313	0.0305	0.0253
1694	0.0417	0.0314	0.0306	0.0254
1692	0.0418	0.0315	0.0307	0.0256
1690	0.0418	0.0315	0.0309	0.0258
1688	0.0419	0.0316	0.031	0.0259
1686	0.0421	0.0317	0.0312	0.0261
1684	0.0422	0.0317	0.0314	0.0263
1682	0.0424	0.0318	0.0317	0.0265
1680	0.0426	0.0319	0.0319	0.0267
1678	0.0428	0.0319	0.0322	0.0269
1676	0.0431	0.0319	0.0324	0.0272
1674	0.0434	0.032	0.0326	0.0274
1672	0.0439	0.0321	0.0329	0.0277
1670	0.0443	0.0322	0.0331	0.028
1668	0.0448	0.0323	0.0333	0.0284
1666	0.0451	0.0323	0.0334	0.0287
1664	0.0455	0.0324	0.0336	0.0291
1662	0.0457	0.0324	0.0337	0.0294
1660	0.046	0.0325	0.0338	0.0297
1658	0.0463	0.0326	0.034	0.0299
1656	0.0467	0.0327	0.0341	0.0301
1654	0.0472	0.0329	0.0342	0.0303
1652	0.0477	0.0331	0.0343	0.0304
1650	0.0478	0.0332	0.0344	0.0305
1648	0.0478	0.0333	0.0346	0.0305
1646	0.0475	0.0334	0.0347	0.0305
1644	0.0473	0.0334	0.0349	0.0305
1642	0.0474	0.0335	0.035	0.0304
1640	0.0478	0.0336	0.0352	0.0303
1638	0.0484	0.0338	0.0353	0.0302
1636	0.0491	0.0341	0.0355	0.03
1634	0.0492	0.0343	0.0356	0.0299
1632	0.0488	0.0345	0.0357	0.0298
1630	0.0474	0.0346	0.0358	0.0297
1628	0.0456	0.0345	0.0359	0.0297
1626	0.0435	0.0343	0.036	0.0297
1624	0.0415	0.0342	0.0361	0.0297
1622	0.0403	0.0343	0.0362	0.0297
1620	0.0396	0.0348	0.0363	0.0298
1618	0.0397	0.036	0.0364	0.0299
1616	0.0401	0.0376	0.0366	0.03
1614	0.0406	0.0396	0.0367	0.0301
1612	0.0411	0.0415	0.0368	0.0302
1610	0.0413	0.043	0.0369	0.0303
1608	0.0413	0.0438	0.037	0.0304
1606	0.0413	0.0436	0.0372	0.0306
1604	0.0413	0.0426	0.0373	0.0307
1602	0.0413	0.0411	0.0375	0.0308
1600	0.0414	0.0393	0.0376	0.031
1598	0.0416	0.0379	0.0377	0.0311
1596	0.0417	0.0367	0.0378	0.0312
1594	0.0419	0.0362	0.0379	0.0313
1592	0.0421	0.0362	0.038	0.0314
1590	0.0423	0.0364	0.0381	0.0314
1588	0.0424	0.0369	0.0383	0.0314
1586	0.0425	0.0372	0.0385	0.0315
1584	0.0425	0.0374	0.0387	0.0315
1582	0.0425	0.0375	0.0389	0.0315
1580	0.0426	0.0374	0.0392	0.0315
1578	0.0428	0.0374	0.0395	0.0316
1576	0.0431	0.0375	0.0398	0.0317
1574	0.0434	0.0376	0.0401	0.0318
1572	0.0437	0.0379	0.0405	0.0319
1570	0.0438	0.0381	0.0408	0.0321
1568	0.0439	0.0383	0.0411	0.0324
1566	0.0438	0.0384	0.0414	0.0327
1564	0.0438	0.0385	0.0417	0.033
1562	0.044	0.0386	0.042	0.0333
1560	0.0445	0.0388	0.0422	0.0336
1558	0.0452	0.0392	0.0424	0.034
1556	0.0459	0.0396	0.0426	0.0343
1554	0.0462	0.04	0.0427	0.0346
1552	0.0463	0.0403	0.0428	0.0348
1550	0.046	0.0405	0.0429	0.035
1548	0.0457	0.0407	0.043	0.0351
1546	0.0458	0.041	0.0431	0.0352
1544	0.0466	0.0415	0.0433	0.0353
1542	0.0483	0.0421	0.0435	0.0354
1540	0.0506	0.0429	0.0438	0.0354
1538	0.0533	0.0435	0.0441	0.0355
1536	0.0559	0.0441	0.0446	0.0355
1534	0.0577	0.0443	0.0452	0.0356
1532	0.0589	0.0444	0.0458	0.0357
1530	0.0592	0.0445	0.0465	0.0359
1528	0.059	0.0449	0.0472	0.0361
1526	0.0586	0.0459	0.048	0.0363
1524	0.0582	0.0473	0.0489	0.0367
1522	0.0581	0.0493	0.0497	0.037
1520	0.0583	0.0516	0.0505	0.0374
1518	0.0587	0.0538	0.0512	0.0379
1516	0.0592	0.0557	0.0519	0.0383
1514	0.0597	0.057	0.0525	0.0388
1512	0.0602	0.0578	0.0531	0.0393
1510	0.0605	0.0579	0.0535	0.0397
1508	0.0609	0.0577	0.0539	0.0401
1506	0.0612	0.0575	0.0542	0.0405
1504	0.0615	0.0572	0.0545	0.0408
1502	0.0619	0.0573	0.0547	0.0411
1500	0.0622	0.0576	0.0548	0.0413
1498	0.0626	0.058	0.0549	0.0415
1496	0.0629	0.0585	0.055	0.0416
1494	0.0631	0.0588	0.0551	0.0417
1492	0.0632	0.059	0.0551	0.0418
1490	0.0633	0.0592	0.0552	0.0418
1488	0.0633	0.0595	0.0553	0.0419
1486	0.0633	0.0599	0.0555	0.0419
1484	0.0634	0.0604	0.0558	0.0419
1482	0.0635	0.0611	0.056	0.042
1480	0.0636	0.0617	0.0563	0.042
1478	0.0637	0.0623	0.0567	0.0421
1476	0.0639	0.0628	0.057	0.0422
1474	0.064	0.0632	0.0573	0.0424
1472	0.0642	0.0635	0.0577	0.0425
1470	0.0644	0.0638	0.058	0.0427
1468	0.0646	0.0641	0.0583	0.0429
1466	0.0649	0.0644	0.0586	0.0431
1464	0.0652	0.0646	0.0588	0.0433
1462	0.0656	0.0648	0.059	0.0435
1460	0.0659	0.0649	0.0591	0.0438
1458	0.0663	0.0649	0.0592	0.044
1456	0.0666	0.065	0.0593	0.0442
1454	0.067	0.065	0.0594	0.0445
1452	0.0673	0.0651	0.0595	0.0447
1450	0.0677	0.0652	0.0595	0.0449
1448	0.0681	0.0654	0.0596	0.0452
1446	0.0684	0.0655	0.0598	0.0454
1444	0.0688	0.0657	0.0599	0.0456
1442	0.0691	0.066	0.0601	0.0459
1440	0.0695	0.0663	0.0603	0.0461
1438	0.0699	0.0666	0.0606	0.0463
1436	0.0703	0.067	0.0609	0.0466
1434	0.0706	0.0674	0.0612	0.0468
1432	0.071	0.0678	0.0615	0.047
1430	0.0713	0.0682	0.0619	0.0472
1428	0.0715	0.0686	0.0622	0.0473
1426	0.0718	0.0689	0.0625	0.0475
1424	0.0719	0.0693	0.0628	0.0476
1422	0.072	0.0696	0.0631	0.0476
1420	0.0721	0.0699	0.0632	0.0477
1418	0.0721	0.0701	0.0634	0.0477
1416	0.072	0.0702	0.0634	0.0476
1414	0.0718	0.0703	0.0634	0.0476
1412	0.0716	0.0703	0.0634	0.0475
1410	0.0713	0.0702	0.0633	0.0473
1408	0.071	0.07	0.063	0.0471
1406	0.0706	0.0697	0.0628	0.0469
1404	0.0702	0.0694	0.0624	0.0466
1402	0.0697	0.0689	0.0619	0.0463
1400	0.0692	0.0683	0.0614	0.0459
1398	0.0687	0.0676	0.0608	0.0455
1396	0.068	0.0668	0.0601	0.0451
1394	0.0674	0.0659	0.0593	0.0446
1392	0.0667	0.065	0.0584	0.0441
1390	0.066	0.064	0.0575	0.0435
1388	0.0652	0.063	0.0566	0.043
1386	0.0644	0.062	0.0556	0.0424
1384	0.0635	0.061	0.0547	0.0418
1382	0.0627	0.06	0.0537	0.0412
1380	0.0618	0.059	0.0528	0.0406
1378	0.061	0.0581	0.0519	0.04
1376	0.0601	0.0572	0.0511	0.0395
1374	0.0593	0.0563	0.0503	0.0389
1372	0.0585	0.0555	0.0496	0.0384
1370	0.0577	0.0547	0.0489	0.0379
1368	0.057	0.0539	0.0483	0.0374
1366	0.0563	0.0532	0.0477	0.0369
1364	0.0557	0.0525	0.0472	0.0365
1362	0.0551	0.0519	0.0467	0.0361
1360	0.0545	0.0512	0.0462	0.0357
1358	0.054	0.0506	0.0457	0.0354
1356	0.0535	0.05	0.0452	0.0351
1354	0.053	0.0494	0.0448	0.0348
1352	0.0526	0.0489	0.0444	0.0345
1350	0.0522	0.0484	0.0439	0.0342
1348	0.0518	0.0479	0.0435	0.034
1346	0.0515	0.0474	0.0432	0.0337
1344	0.0512	0.047	0.0428	0.0335
1342	0.0509	0.0466	0.0425	0.0334
1340	0.0506	0.0463	0.0422	0.0332
1338	0.0503	0.046	0.0419	0.033
1336	0.0501	0.0457	0.0417	0.0329
1334	0.0498	0.0454	0.0415	0.0327
1332	0.0496	0.0452	0.0413	0.0326
1330	0.0494	0.045	0.0411	0.0325
1328	0.0492	0.0448	0.0409	0.0323
1326	0.049	0.0446	0.0408	0.0322
1324	0.0488	0.0444	0.0406	0.0321
1322	0.0486	0.0442	0.0404	0.0319
1320	0.0484	0.0441	0.0403	0.0318
1318	0.0482	0.044	0.0401	0.0317
1316	0.048	0.0438	0.0399	0.0316
1314	0.0479	0.0437	0.0398	0.0315
1312	0.0477	0.0436	0.0396	0.0313
1310	0.0475	0.0435	0.0395	0.0312
1308	0.0474	0.0434	0.0393	0.0312
1306	0.0473	0.0433	0.0392	0.0311
1304	0.0472	0.0432	0.0391	0.031
1302	0.0471	0.0431	0.039	0.031
1300	0.047	0.0431	0.0389	0.0309
1298	0.047	0.043	0.0388	0.0309
1296	0.047	0.0429	0.0387	0.0308
1294	0.047	0.0428	0.0386	0.0308
1292	0.047	0.0428	0.0385	0.0308
1290	0.047	0.0427	0.0385	0.0308
1288	0.047	0.0427	0.0384	0.0308
1286	0.0471	0.0426	0.0384	0.0308
1284	0.0471	0.0426	0.0384	0.0309
1282	0.0472	0.0426	0.0383	0.0309
1280	0.0472	0.0425	0.0383	0.0309
1278	0.0473	0.0425	0.0383	0.0309
1276	0.0474	0.0425	0.0383	0.031
1274	0.0474	0.0426	0.0383	0.031
1272	0.0475	0.0426	0.0384	0.031
1270	0.0475	0.0426	0.0384	0.031
1268	0.0476	0.0426	0.0384	0.031
1266	0.0476	0.0426	0.0384	0.031
1264	0.0477	0.0427	0.0385	0.0311
1262	0.0477	0.0427	0.0385	0.0311
1260	0.0477	0.0427	0.0385	0.0311
1258	0.0478	0.0427	0.0386	0.0311
1256	0.0479	0.0427	0.0386	0.0312
1254	0.0479	0.0428	0.0387	0.0312
1252	0.048	0.0428	0.0387	0.0312
1250	0.0481	0.0428	0.0387	0.0313
1248	0.0481	0.0429	0.0388	0.0313
1246	0.0482	0.0429	0.0388	0.0314
1244	0.0483	0.0429	0.0389	0.0315
1242	0.0485	0.043	0.039	0.0316
1240	0.0486	0.043	0.039	0.0317
1238	0.0488	0.0431	0.0391	0.0318
1236	0.0489	0.0432	0.0392	0.0319
1234	0.0491	0.0433	0.0393	0.032
1232	0.0493	0.0433	0.0394	0.0322
1230	0.0495	0.0435	0.0396	0.0323
1228	0.0498	0.0436	0.0397	0.0325
1226	0.0501	0.0437	0.0399	0.0327
1224	0.0504	0.0438	0.04	0.0329
1222	0.0507	0.044	0.0402	0.0331
1220	0.0511	0.0442	0.0404	0.0333
1218	0.0515	0.0443	0.0406	0.0336
1216	0.0519	0.0445	0.0408	0.0338
1214	0.0523	0.0448	0.0411	0.0341
1212	0.0528	0.045	0.0413	0.0343
1210	0.0533	0.0452	0.0416	0.0346
1208	0.0538	0.0455	0.0418	0.0349
1206	0.0543	0.0457	0.0421	0.0352
1204	0.0548	0.046	0.0424	0.0354
1202	0.0553	0.0463	0.0427	0.0357
1200	0.0558	0.0466	0.043	0.036
1198	0.0563	0.0469	0.0433	0.0363
1196	0.0567	0.0472	0.0436	0.0366
1194	0.0572	0.0476	0.044	0.0368
1192	0.0577	0.0479	0.0443	0.0371
1190	0.0581	0.0483	0.0447	0.0374
1188	0.0585	0.0486	0.045	0.0376
1186	0.0589	0.049	0.0454	0.0379
1184	0.0594	0.0494	0.0458	0.0382
1182	0.0598	0.0499	0.0462	0.0385
1180	0.0602	0.0503	0.0466	0.0388
1178	0.0607	0.0508	0.047	0.0391
1176	0.0611	0.0512	0.0475	0.0394
1174	0.0616	0.0517	0.0479	0.0397
1172	0.0622	0.0522	0.0484	0.04
1170	0.0627	0.0527	0.0488	0.0404
1168	0.0633	0.0532	0.0493	0.0407
1166	0.0639	0.0537	0.0498	0.0411
1164	0.0645	0.0542	0.0503	0.0415
1162	0.0652	0.0547	0.0508	0.0419
1160	0.0659	0.0552	0.0513	0.0423
1158	0.0666	0.0557	0.0518	0.0428
1156	0.0674	0.0563	0.0523	0.0432
1154	0.0681	0.0568	0.0528	0.0437
1152	0.0689	0.0573	0.0534	0.0441
1150	0.0697	0.0579	0.0539	0.0446
1148	0.0705	0.0584	0.0545	0.0452
1146	0.0713	0.059	0.055	0.0457
1144	0.0722	0.0596	0.0556	0.0463
1142	0.073	0.0603	0.0563	0.0468
1140	0.0739	0.061	0.057	0.0474
1138	0.0748	0.0617	0.0577	0.048
1136	0.0757	0.0624	0.0584	0.0487
1134	0.0766	0.0632	0.0592	0.0494
1132	0.0776	0.0641	0.0601	0.0501
1130	0.0786	0.065	0.061	0.0508
1128	0.0796	0.0659	0.0619	0.0515
1126	0.0806	0.0669	0.0629	0.0523
1124	0.0817	0.068	0.064	0.0531
1122	0.0829	0.0691	0.0651	0.0539
1120	0.084	0.0702	0.0662	0.0548
1118	0.0852	0.0714	0.0673	0.0557
1116	0.0864	0.0726	0.0685	0.0565
1114	0.0877	0.0738	0.0697	0.0574
1112	0.0889	0.075	0.071	0.0583
1110	0.0902	0.0762	0.0722	0.0592
1108	0.0914	0.0775	0.0734	0.0601
1106	0.0927	0.0787	0.0746	0.061
1104	0.0939	0.0799	0.0758	0.0619
1102	0.0951	0.0811	0.077	0.0628
1100	0.0962	0.0822	0.0782	0.0636
1098	0.0972	0.0833	0.0793	0.0644
1096	0.0983	0.0844	0.0804	0.0651
1094	0.0992	0.0855	0.0814	0.0658
1092	0.1001	0.0865	0.0824	0.0665
1090	0.1009	0.0875	0.0834	0.0672
1088	0.1017	0.0885	0.0844	0.0678
1086	0.1024	0.0895	0.0854	0.0685
1084	0.1031	0.0905	0.0864	0.0691
1082	0.1038	0.0916	0.0874	0.0697
1080	0.1045	0.0926	0.0884	0.0703
1078	0.1052	0.0937	0.0895	0.071
1076	0.1059	0.0948	0.0906	0.0716
1074	0.1066	0.096	0.0917	0.0723
1072	0.1074	0.0973	0.0929	0.073
1070	0.1083	0.0986	0.0942	0.0738
1068	0.1092	0.0999	0.0955	0.0746
1066	0.1101	0.1014	0.0969	0.0754
1064	0.1111	0.1029	0.0983	0.0763
1062	0.1122	0.1044	0.0998	0.0772
1060	0.1133	0.106	0.1013	0.0782
1058	0.1145	0.1077	0.1029	0.0791
1056	0.1157	0.1093	0.1045	0.0801
1054	0.1169	0.111	0.106	0.0811
1052	0.1181	0.1127	0.1076	0.0821
1050	0.1193	0.1143	0.1092	0.0831
1048	0.1205	0.1159	0.1107	0.084
1046	0.1217	0.1174	0.1121	0.0849
1044	0.1227	0.1188	0.1135	0.0857
1042	0.1237	0.1202	0.1148	0.0865
1040	0.1246	0.1214	0.1159	0.0872
1038	0.1254	0.1225	0.117	0.0878
1036	0.1261	0.1235	0.1179	0.0883
1034	0.1266	0.1243	0.1187	0.0888
1032	0.127	0.125	0.1194	0.0891
1030	0.1273	0.1256	0.12	0.0893
1028	0.1274	0.126	0.1204	0.0895
1026	0.1274	0.1263	0.1207	0.0896
1024	0.1273	0.1264	0.1208	0.0895
1022	0.1271	0.1264	0.1209	0.0894
1020	0.1267	0.1263	0.1208	0.0892
1018	0.1262	0.1261	0.1207	0.089
1016	0.1256	0.1257	0.1204	0.0886
1014	0.1249	0.1253	0.12	0.0883
1012	0.1241	0.1248	0.1196	0.0878
1010	0.1232	0.1242	0.1191	0.0874
1008	0.1223	0.1236	0.1185	0.0869
1006	0.1214	0.1229	0.1179	0.0863
1004	0.1204	0.1221	0.1172	0.0858
1002	0.1193	0.1214	0.1165	0.0852
1000	0.1183	0.1206	0.1158	0.0846
998	0.1173	0.1197	0.1151	0.084
996	0.1162	0.1189	0.1143	0.0834
994	0.1152	0.1181	0.1135	0.0829
992	0.1142	0.1173	0.1127	0.0823
990	0.1132	0.1165	0.112	0.0817
988	0.1122	0.1156	0.1112	0.0811
986	0.1113	0.1148	0.1104	0.0805
984	0.1103	0.114	0.1096	0.0798
982	0.1094	0.1132	0.1087	0.0792
980	0.1084	0.1123	0.1079	0.0786
978	0.1075	0.1114	0.107	0.0779
976	0.1066	0.1105	0.1061	0.0772
974	0.1056	0.1096	0.1052	0.0765
972	0.1046	0.1086	0.1042	0.0757
970	0.1037	0.1076	0.1032	0.0749
968	0.1026	0.1065	0.1021	0.0741
966	0.1016	0.1054	0.101	0.0732
964	0.1005	0.1042	0.0998	0.0723
962	0.0994	0.1029	0.0985	0.0714
960	0.0982	0.1016	0.0972	0.0704
958	0.0969	0.1002	0.0958	0.0693
956	0.0957	0.0987	0.0943	0.0683
954	0.0943	0.0971	0.0928	0.0672
952	0.093	0.0955	0.0912	0.066
950	0.0916	0.0939	0.0896	0.0649
948	0.0901	0.0922	0.088	0.0637
946	0.0887	0.0904	0.0863	0.0625
944	0.0872	0.0887	0.0846	0.0613
942	0.0858	0.0869	0.083	0.0601
940	0.0844	0.0852	0.0813	0.059
938	0.083	0.0834	0.0797	0.0579
936	0.0816	0.0818	0.0781	0.0568
934	0.0803	0.0801	0.0766	0.0557
932	0.0791	0.0786	0.0751	0.0548
930	0.0779	0.0771	0.0737	0.0538
928	0.0767	0.0756	0.0724	0.0529
926	0.0757	0.0743	0.0711	0.0521
924	0.0747	0.073	0.0699	0.0513
922	0.0737	0.0718	0.0688	0.0506
920	0.0729	0.0707	0.0677	0.05
918	0.072	0.0696	0.0667	0.0493
916	0.0713	0.0686	0.0658	0.0488
914	0.0705	0.0677	0.0649	0.0482
912	0.0699	0.0669	0.0642	0.0477
910	0.0693	0.0661	0.0634	0.0473
908	0.0688	0.0655	0.0628	0.0469
906	0.0684	0.065	0.0623	0.0467
904	0.0681	0.0646	0.0619	0.0464
902	0.0679	0.0643	0.0616	0.0463
900	0.0678	0.0642	0.0615	0.0463
898	0.0678	0.0643	0.0615	0.0464
896	0.068	0.0645	0.0617	0.0466
894	0.0683	0.0649	0.062	0.0468
892	0.0687	0.0655	0.0624	0.0472
890	0.0692	0.0661	0.0629	0.0477
888	0.0698	0.0669	0.0635	0.0482
886	0.0704	0.0676	0.0642	0.0487
884	0.0711	0.0684	0.0648	0.0492
882	0.0717	0.0692	0.0654	0.0497
880	0.0722	0.0698	0.066	0.0501
878	0.0726	0.0703	0.0664	0.0505
876	0.0729	0.0706	0.0666	0.0507
874	0.073	0.0707	0.0666	0.0508
872	0.073	0.0705	0.0665	0.0507
870	0.0727	0.0701	0.0661	0.0505
868	0.0723	0.0695	0.0656	0.0501
866	0.0717	0.0687	0.0648	0.0496
864	0.0709	0.0677	0.0639	0.049
862	0.07	0.0666	0.0629	0.0483
860	0.069	0.0653	0.0618	0.0475
858	0.068	0.064	0.0607	0.0467
856	0.067	0.0628	0.0595	0.0459
854	0.0659	0.0615	0.0584	0.0451
852	0.0649	0.0603	0.0573	0.0444
850	0.064	0.0592	0.0564	0.0437
848	0.0631	0.0582	0.0555	0.0431
846	0.0622	0.0573	0.0547	0.0425
844	0.0615	0.0565	0.0539	0.042
842	0.0608	0.0558	0.0533	0.0415
840	0.0603	0.0552	0.0528	0.0412
838	0.0597	0.0547	0.0523	0.0408
836	0.0593	0.0543	0.052	0.0405
834	0.0589	0.0539	0.0516	0.0403
832	0.0585	0.0536	0.0513	0.0401
830	0.0582	0.0533	0.0511	0.0398
828	0.0579	0.053	0.0508	0.0397
826	0.0577	0.0528	0.0506	0.0395
824	0.0575	0.0525	0.0504	0.0393
822	0.0573	0.0523	0.0502	0.0392
820	0.0571	0.0522	0.05	0.039
818	0.0569	0.052	0.0499	0.0389
816	0.0568	0.0518	0.0498	0.0388
814	0.0567	0.0517	0.0497	0.0387
812	0.0566	0.0516	0.0496	0.0386
810	0.0565	0.0515	0.0495	0.0385
808	0.0564	0.0514	0.0494	0.0385
806	0.0563	0.0513	0.0494	0.0384
804	0.0562	0.0513	0.0493	0.0384
802	0.0562	0.0512	0.0493	0.0383
800	0.0561	0.0512	0.0492	0.0383
798	0.0561	0.0511	0.0492	0.0383
796	0.0561	0.0511	0.0492	0.0383
794	0.056	0.051	0.0491	0.0383
792	0.056	0.051	0.0491	0.0383
790	0.056	0.051	0.0491	0.0383
788	0.056	0.051	0.0492	0.0383
786	0.056	0.051	0.0492	0.0383
784	0.0561	0.051	0.0492	0.0383
782	0.0562	0.0511	0.0493	0.0384
780	0.0563	0.0511	0.0494	0.0384
778	0.0564	0.0512	0.0495	0.0385
776	0.0566	0.0513	0.0496	0.0385
774	0.0567	0.0514	0.0497	0.0386
772	0.0569	0.0516	0.0499	0.0387
770	0.0571	0.0517	0.05	0.0388
768	0.0574	0.0519	0.0502	0.0389
766	0.0576	0.052	0.0503	0.039
764	0.0578	0.0522	0.0505	0.0392
762	0.0581	0.0523	0.0507	0.0393
760	0.0583	0.0525	0.0509	0.0394
758	0.0585	0.0527	0.051	0.0395
756	0.0587	0.0528	0.0512	0.0396
754	0.0589	0.053	0.0514	0.0398
752	0.0591	0.0532	0.0516	0.0399
750	0.0593	0.0534	0.0518	0.04
748	0.0595	0.0536	0.052	0.0401
746	0.0596	0.0538	0.0522	0.0402
744	0.0597	0.054	0.0524	0.0404
742	0.0598	0.0542	0.0526	0.0405
740	0.0599	0.0544	0.0528	0.0406
738	0.06	0.0547	0.053	0.0407
736	0.0601	0.0549	0.0532	0.0408
734	0.0602	0.0552	0.0534	0.041
732	0.0603	0.0554	0.0536	0.0411
730	0.0604	0.0557	0.0539	0.0413
728	0.0605	0.056	0.0542	0.0414
726	0.0607	0.0564	0.0545	0.0416
724	0.0608	0.0567	0.0548	0.0418
722	0.061	0.057	0.0551	0.042
720	0.0611	0.0573	0.0554	0.0422
718	0.0613	0.0576	0.0557	0.0424
716	0.0615	0.0579	0.0561	0.0427
714	0.0616	0.0582	0.0564	0.0429
712	0.0618	0.0585	0.0567	0.0431
710	0.0619	0.0587	0.057	0.0432
708	0.0621	0.0589	0.0572	0.0434
706	0.0621	0.0591	0.0575	0.0436
704	0.0622	0.0592	0.0577	0.0437
702	0.0623	0.0594	0.0579	0.0439
700	0.0623	0.0595	0.058	0.044
698	0.0623	0.0596	0.0582	0.0441
696	0.0623	0.0597	0.0583	0.0442
694	0.0623	0.0598	0.0585	0.0443
692	0.0623	0.0599	0.0586	0.0444
690	0.0624	0.06	0.0587	0.0445
688	0.0624	0.0601	0.0588	0.0445
686	0.0624	0.0601	0.0589	0.0446
684	0.0625	0.0602	0.059	0.0447
682	0.0626	0.0603	0.0591	0.0448
680	0.0627	0.0604	0.0591	0.0448
678	0.0628	0.0604	0.0592	0.0449
676	0.063	0.0604	0.0592	0.045
674	0.0632	0.0604	0.0592	0.045
672	0.0634	0.0604	0.0592	0.045
670	0.0636	0.0604	0.0592	0.0451
668	0.0638	0.0604	0.0591	0.0451
666	0.0641	0.0603	0.0591	0.0451
664	0.0643	0.0603	0.0591	0.0452
662	0.0646	0.0603	0.0592	0.0453
660	0.065	0.0604	0.0593	0.0454
658	0.0653	0.0605	0.0594	0.0455
656	0.0657	0.0607	0.0596	0.0457
654	0.0661	0.0609	0.0599	0.046
652	0.0666	0.0613	0.0602	0.0463
650	0.0671	0.0617	0.0607	0.0467
648	0.0677	0.0622	0.0612	0.0472
646	0.0683	0.0628	0.0618	0.0478
644	0.069	0.0634	0.0624	0.0484
642	0.0697	0.0642	0.0632	0.0491
640	0.0705	0.065	0.064	0.0499
638	0.0714	0.0659	0.0649	0.0508
636	0.0724	0.0669	0.0659	0.0518
634	0.0734	0.068	0.067	0.0529
632	0.0746	0.0691	0.0681	0.054
630	0.0759	0.0703	0.0693	0.0552
628	0.0772	0.0716	0.0705	0.0564
626	0.0786	0.0729	0.0718	0.0576
624	0.0801	0.0742	0.0731	0.0589
622	0.0817	0.0755	0.0745	0.0601
620	0.0833	0.0769	0.0758	0.0613
618	0.0849	0.0782	0.0771	0.0625
616	0.0864	0.0794	0.0784	0.0635
614	0.0879	0.0806	0.0796	0.0645
612	0.0893	0.0817	0.0807	0.0653
610	0.0906	0.0827	0.0817	0.066
608	0.0917	0.0836	0.0826	0.0665
606	0.0926	0.0843	0.0833	0.0669
604	0.0934	0.0849	0.084	0.0671
602	0.094	0.0854	0.0845	0.0673
600	0.0944	0.0859	0.085	0.0673
598	0.0947	0.0862	0.0854	0.0673
596	0.095	0.0865	0.0857	0.0673
594	0.0951	0.0869	0.0861	0.0672
592	0.0953	0.0872	0.0864	0.0672
590	0.0955	0.0876	0.0869	0.0673
588	0.0957	0.0882	0.0874	0.0674
586	0.096	0.0888	0.0881	0.0676
584	0.0964	0.0895	0.0888	0.068
582	0.0969	0.0904	0.0896	0.0684
580	0.0975	0.0913	0.0906	0.0689
578	0.0981	0.0923	0.0916	0.0695
576	0.0988	0.0934	0.0926	0.0701
574	0.0995	0.0944	0.0936	0.0707
572	0.1002	0.0954	0.0945	0.0712
570	0.1007	0.0962	0.0953	0.0717
568	0.1011	0.0969	0.096	0.072
566	0.1014	0.0973	0.0964	0.0722
564	0.1014	0.0975	0.0966	0.0722
562	0.1011	0.0973	0.0965	0.072
560	0.1005	0.0969	0.0961	0.0717
558	0.0997	0.0961	0.0954	0.0711
556	0.0987	0.095	0.0944	0.0703
554	0.0973	0.0937	0.0932	0.0693
552	0.0958	0.0921	0.0918	0.0682
550	0.0942	0.0904	0.0902	0.067
548	0.0924	0.0885	0.0884	0.0657
546	0.0906	0.0866	0.0867	0.0644
544	0.0888	0.0846	0.0848	0.0631
542	0.0871	0.0827	0.0831	0.0618
540	0.0854	0.0809	0.0814	0.0605
538	0.0839	0.0792	0.0798	0.0594
536	0.0825	0.0776	0.0784	0.0583
534	0.0813	0.0763	0.0771	0.0574
532	0.0802	0.0751	0.076	0.0566
530	0.0794	0.0741	0.0751	0.0559
528	0.0787	0.0733	0.0744	0.0554
526	0.0781	0.0727	0.0738	0.055
524	0.0777	0.0722	0.0734	0.0547
522	0.0774	0.0719	0.0732	0.0546
520	0.0772	0.0718	0.0731	0.0545
518	0.0771	0.0718	0.0732	0.0546
516	0.0771	0.0718	0.0733	0.0547
514	0.0772	0.072	0.0736	0.0549
512	0.0773	0.0723	0.0739	0.0551
510	0.0774	0.0726	0.0742	0.0554
508	0.0776	0.073	0.0746	0.0558
506	0.0777	0.0734	0.0751	0.0561
504	0.078	0.0739	0.0756	0.0565
502	0.0782	0.0744	0.0761	0.0569
500	0.0784	0.0749	0.0767	0.0573
498	0.0787	0.0755	0.0773	0.0577
496	0.079	0.0761	0.0779	0.0581
494	0.0793	0.0768	0.0786	0.0586
492	0.0797	0.0775	0.0793	0.059
490	0.08	0.0782	0.0801	0.0595
488	0.0804	0.0791	0.081	0.06
486	0.0808	0.0799	0.0818	0.0605
484	0.0812	0.0809	0.0828	0.0611
482	0.0817	0.0819	0.0838	0.0617
480	0.0822	0.083	0.0849	0.0623
478	0.0827	0.0841	0.0861	0.063
476	0.0832	0.0853	0.0873	0.0638
474	0.0837	0.0865	0.0886	0.0646
472	0.0843	0.0878	0.0899	0.0655
470	0.0849	0.089	0.0912	0.0664
468	0.0855	0.0903	0.0926	0.0674
466	0.0862	0.0916	0.0939	0.0684
464	0.0868	0.0929	0.0952	0.0693
462	0.0875	0.0941	0.0965	0.0702
460	0.0881	0.0953	0.0977	0.0711
458	0.0887	0.0964	0.0988	0.0719
456	0.0892	0.0974	0.0998	0.0728
454	0.0896	0.0983	0.1008	0.0735
452	0.0899	0.0991	0.1016	0.0742
450	0.0902	0.0998	0.1023	0.0747
448	0.0903	0.1003	0.1029	0.0751
446	0.0903	0.1007	0.1034	0.0752
444	0.0902	0.101	0.1038	0.0753
442	0.09	0.1011	0.1041	0.0753
440	0.0897	0.1012	0.1042	0.0754
438	0.0893	0.1011	0.1042	0.0754
436	0.0888	0.1008	0.1041	0.0754
434	0.0882	0.1004	0.1039	0.0753
432	0.0875	0.0999	0.1035	0.0749
430	0.0867	0.0993	0.103	0.0743
428	0.0859	0.0986	0.1024	0.0736
426	0.085	0.0978	0.1017	0.0728
424	0.0842	0.0968	0.101	0.0721
422	0.0833	0.0958	0.1001	0.0716
420	0.0824	0.0948	0.0991	0.0714
418	0.0815	0.0936	0.0981	0.0717
416	0.0807	0.0924	0.097	0.0721
414	0.0799	0.0912	0.096	0.0727
412	0.0793	0.09	0.0949	0.0732
410	0.0788	0.0889	0.094	0.0734
408	0.0784	0.088	0.0932	0.0733
406	0.0781	0.0872	0.0926	0.0729
404	0.0779	0.0865	0.0921	0.0722
402	0.0778	0.0859	0.0916	0.0714
400	0.0777	0.0853	0.0912	0.0704
