# Supplementary material for: Treatments of wood ash amended biochar to reduce nutrient leaching and immobilise lead, copper, zinc and cadmium in aqueous solution: column experiments
Source: Royal Society of Chemistry journal article supplement (doi:10.1039/d1ew00962a), 2022-01-01
Supplement: d1ew00962a3.pdf [file d1ew00962a3.pdf]

| Metal | Sorbent | Sorbent Weight (mg) | Volume of solution (mL) | Volume of sample (mL) | Total volume (mL) | Dilution factor (-) | Measured Concentration (mg/L) | Actual concentration (mg/L) | Absolute concentration (mg) | Mass per unit mass of sorbent (g/kg) |
|-------|---------|---------------------|-------------------------|-----------------------|-------------------|---------------------|-------------------------------|-----------------------------|-----------------------------|--------------------------------------|
| Ca    | WA      | 24.5                | 50                      | 0.5                   | 5                 | 10.0000             | 8.5029                        | 85.0290                     | 4.2515                      | 173.53                               |
| Ca    | WAS     | 25.6                | 50                      | 0.5                   | 5                 | 10.0000             | 10.7394                       | 107.3940                    | 5.3697                      | 209.75                               |
| Ca    | WA      | 24.5                | 50                      | 5                     | 5                 | 1.0000              | 87.1714                       | 87.1714                     | 4.3586                      | 177.90                               |
| Ca    | WAS     | 25.6                | 50                      | 5                     | 5                 | 1.0000              | 110.0713                      | 110.0713                    | 5.5036                      | 214.98                               |
| K     | WA      | 24.5                | 50                      | 0.5                   | 5                 | 10.0000             | 1.3109                        | 13.1090                     | 0.6555                      | 26.75                                |
| K     | WAS     | 25.6                | 50                      | 0.5                   | 5                 | 10.0000             | 0.6175                        | 6.1750                      | 0.3088                      | 12.06                                |
| K     | WA      | 24.5                | 50                      | 5                     | 5                 | 1.0000              | 14.4912                       | 14.4912                     | 0.7246                      | 29.57                                |
| K     | WAS     | 25.6                | 50                      | 5                     | 5                 | 1.0000              | 6.9154                        | 6.9154                      | 0.3458                      | 13.51                                |
| Mg    | WA      | 24.5                | 50                      | 0.5                   | 5                 | 10.0000             | 0.2333                        | 2.3330                      | 0.1167                      | 4.76                                 |
| Mg    | WAS     | 25.6                | 50                      | 0.5                   | 5                 | 10.0000             | 0.2799                        | 2.7990                      | 0.1400                      | 5.47                                 |
| Mg    | WA      | 24.5                | 50                      | 5                     | 5                 | 1.0000              | 2.2021                        | 2.2021                      | 0.1101                      | 4.49                                 |
| Mg    | WAS     | 25.6                | 50                      | 5                     | 5                 | 1.0000              | 2.6098                        | 2.6098                      | 0.1305                      | 5.10                                 |
| Na    | WA      | 24.5                | 50                      | 0.5                   | 5                 | 10.0000             | 1.5021                        | 15.0210                     | 0.7511                      | 30.66                                |
| Na    | WAS     | 25.6                | 50                      | 0.5                   | 5                 | 10.0000             | 0.8771                        | 8.7710                      | 0.4386                      | 17.13                                |
| Na    | WA      | 24.5                | 50                      | 5                     | 5                 | 1.0000              | 15.7663                       | 15.7663                     | 0.7883                      | 32.18                                |
| Na    | WAS     | 25.6                | 50                      | 5                     | 5                 | 1.0000              | 9.7352                        | 9.7352                      | 0.4868                      | 19.01                                |
| P     | WA      | 24.5                | 50                      | 0.5                   | 5                 | 10.0000             | 2.7389                        | 27.3890                     | 1.3695                      | 55.90                                |
| P     | WAS     | 25.6                | 50                      | 0.5                   | 5                 | 10.0000             | 3.6416                        | 36.4160                     | 1.8208                      | 71.13                                |
| P     | WA      | 24.5                | 50                      | 5                     | 5                 | 1.0000              | 23.3966                       | 23.3966                     | 1.1698                      | 47.75                                |
| P     | WAS     | 25.6                | 50                      | 5                     | 5                 | 1.0000              | 31.7259                       | 31.7259                     | 1.5863                      | 61.96                                |
| Si    | WA      | 24.5                | 50                      | 0.5                   | 5                 | 10.0000             | 2.0630                        | 20.6300                     | 1.0315                      | 42.10                                |
| Si    | WAS     | 25.6                | 50                      | 0.5                   | 5                 | 10.0000             | 2.3067                        | 23.0670                     | 1.1534                      | 45.05                                |
| Si    | WA      | 24.5                | 50                      | 5                     | 5                 | 1.0000              | 18.6533                       | 18.6533                     | 0.9327                      | 38.07                                |
| Si    | WAS     | 25.6                | 50                      | 5                     | 5                 | 1.0000              | 20.6861                       | 20.6861                     | 1.0343                      | 40.40                                |

SI 1 – concentrations of alkali and alkaline earths, phosphorus and silicates for larch biochar mixed cold with wood ash (WA) and sintered with wood ash (WAS)
