# Supplementary material for: Treatments of wood ash amended biochar to reduce nutrient leaching and immobilise lead, copper, zinc and cadmium in aqueous solution: column experiments
Source: Royal Society of Chemistry journal article supplement (doi:10.1039/d1ew00962a), 2022-01-01
Supplement: d1ew00962a6.pdf [file d1ew00962a6.pdf]

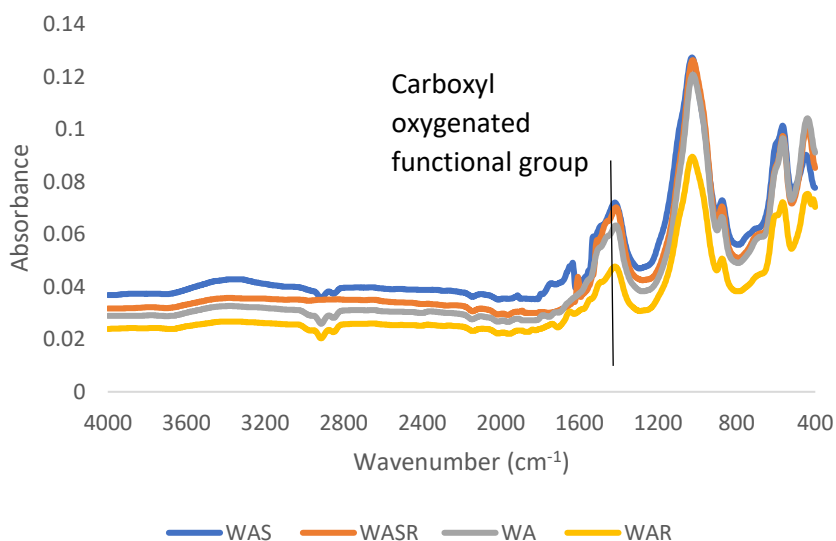

SI 4 – FTIR spectra of larch biochar sintered with wood ash before rinsing with deionised water (WAS) and after rinsing with 800mL of deionised water (WASR) and larch biochar mixed cold with wood ash before rinsing with deionised water (WA) and after rinsing with deionised water (WAR)
