# Supplementary material for: Treatments of wood ash amended biochar to reduce nutrient leaching and immobilise lead, copper, zinc and cadmium in aqueous solution: column experiments
Source: Royal Society of Chemistry journal article supplement (doi:10.1039/d1ew00962a), 2022-01-01
Supplement: d1ew00962a7.pdf [file d1ew00962a7.pdf]

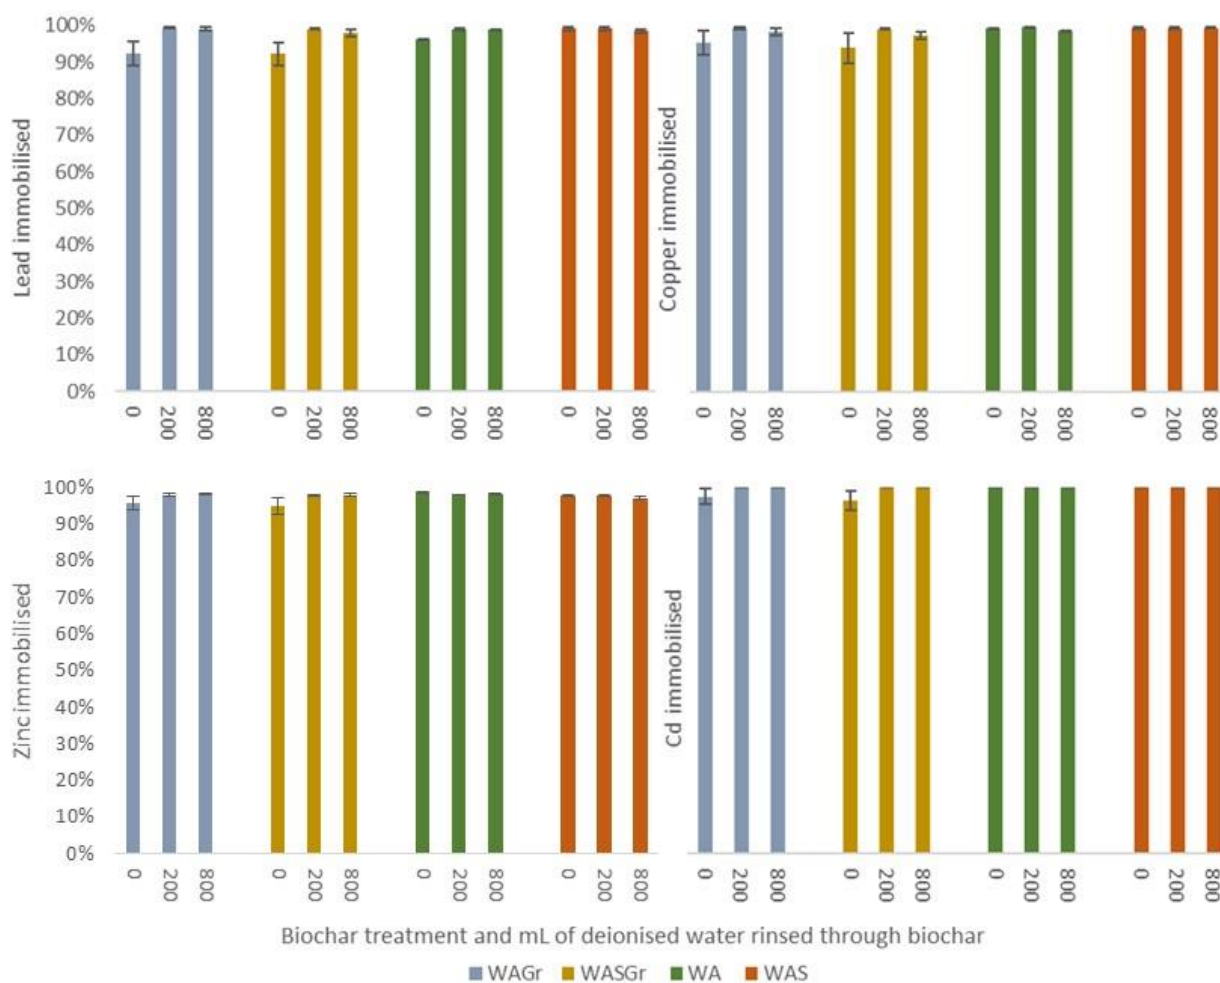

SI 5 - Immobilisation by wood ash mixed cold with larch biochar (WA), wood ash mixed cold and granulated to <3mm (WAGr), wood ash sintered to larch biochar (WAS) and wood ash sintered to larch biochar and granulated to <3mm (WASGr) mg/L when rinsed by 0mL, 200mL and 800mL of lead, copper, zinc and cadmium. The concentration of metals in solution was 10 mg/L.
