# Supplementary material for: Treatments of wood ash amended biochar to reduce nutrient leaching and immobilise lead, copper, zinc and cadmium in aqueous solution: column experiments
Source: Royal Society of Chemistry journal article supplement (doi:10.1039/d1ew00962a), 2022-01-01
Supplement: d1ew00962a8.pdf [file d1ew00962a8.pdf]

## Supplementary Information

| Metal | Sorbent | Sorbent Weight (mg) | Volume of solution (mL) | Volume of sample (mL) | Total volume (mL) | Dilution factor (-) | Measured Concentration (mg/L) | Actual concentration (mg/L) | Absolute concentration (mg) | Mass per unit mass of sorbent (g/kg) |
|-------|---------|---------------------|-------------------------|-----------------------|-------------------|---------------------|-------------------------------|-----------------------------|-----------------------------|--------------------------------------|
| Ca    | WA      | 24.5                | 50                      | 0.5                   | 5                 | 10.0000             | 8.5029                        | 85.0290                     | 4.2515                      | 173.53                               |
| Ca    | WAS     | 25.6                | 50                      | 0.5                   | 5                 | 10.0000             | 10.7394                       | 107.3940                    | 5.3697                      | 209.75                               |
| Ca    | WA      | 24.5                | 50                      | 5                     | 5                 | 1.0000              | 87.1714                       | 87.1714                     | 4.3586                      | 177.90                               |
| Ca    | WAS     | 25.6                | 50                      | 5                     | 5                 | 1.0000              | 110.0713                      | 110.0713                    | 5.5036                      | 214.98                               |
| K     | WA      | 24.5                | 50                      | 0.5                   | 5                 | 10.0000             | 1.3109                        | 13.1090                     | 0.6555                      | 26.75                                |
| K     | WAS     | 25.6                | 50                      | 0.5                   | 5                 | 10.0000             | 0.6175                        | 6.1750                      | 0.3088                      | 12.06                                |
| K     | WA      | 24.5                | 50                      | 5                     | 5                 | 1.0000              | 14.4912                       | 14.4912                     | 0.7246                      | 29.57                                |
| K     | WAS     | 25.6                | 50                      | 5                     | 5                 | 1.0000              | 6.9154                        | 6.9154                      | 0.3458                      | 13.51                                |
| Mg    | WA      | 24.5                | 50                      | 0.5                   | 5                 | 10.0000             | 0.2333                        | 2.3330                      | 0.1167                      | 4.76                                 |
| Mg    | WAS     | 25.6                | 50                      | 0.5                   | 5                 | 10.0000             | 0.2799                        | 2.7990                      | 0.1400                      | 5.47                                 |
| Mg    | WA      | 24.5                | 50                      | 5                     | 5                 | 1.0000              | 2.2021                        | 2.2021                      | 0.1101                      | 4.49                                 |
| Mg    | WAS     | 25.6                | 50                      | 5                     | 5                 | 1.0000              | 2.6098                        | 2.6098                      | 0.1305                      | 5.10                                 |
| Na    | WA      | 24.5                | 50                      | 0.5                   | 5                 | 10.0000             | 1.5021                        | 15.0210                     | 0.7511                      | 30.66                                |
| Na    | WAS     | 25.6                | 50                      | 0.5                   | 5                 | 10.0000             | 0.8771                        | 8.7710                      | 0.4386                      | 17.13                                |
| Na    | WA      | 24.5                | 50                      | 5                     | 5                 | 1.0000              | 15.7663                       | 15.7663                     | 0.7883                      | 32.18                                |
| Na    | WAS     | 25.6                | 50                      | 5                     | 5                 | 1.0000              | 9.7352                        | 9.7352                      | 0.4868                      | 19.01                                |
| P     | WA      | 24.5                | 50                      | 0.5                   | 5                 | 10.0000             | 2.7389                        | 27.3890                     | 1.3695                      | 55.90                                |
| P     | WAS     | 25.6                | 50                      | 0.5                   | 5                 | 10.0000             | 3.6416                        | 36.4160                     | 1.8208                      | 71.13                                |
| P     | WA      | 24.5                | 50                      | 5                     | 5                 | 1.0000              | 23.3966                       | 23.3966                     | 1.1698                      | 47.75                                |
| P     | WAS     | 25.6                | 50                      | 5                     | 5                 | 1.0000              | 31.7259                       | 31.7259                     | 1.5863                      | 61.96                                |
| Si    | WA      | 24.5                | 50                      | 0.5                   | 5                 | 10.0000             | 2.0630                        | 20.6300                     | 1.0315                      | 42.10                                |
| Si    | WAS     | 25.6                | 50                      | 0.5                   | 5                 | 10.0000             | 2.3067                        | 23.0670                     | 1.1534                      | 45.05                                |
| Si    | WA      | 24.5                | 50                      | 5                     | 5                 | 1.0000              | 18.6533                       | 18.6533                     | 0.9327                      | 38.07                                |
| Si    | WAS     | 25.6                | 50                      | 5                     | 5                 | 1.0000              | 20.6861                       | 20.6861                     | 1.0343                      | 40.40                                |

SI 1 – concentrations of alkali and alkaline earths, phosphorus and silicates for larch biochar mixed cold with wood ash (WA) and sintered with wood ash (WAS)

| Peak Position | Peak Intensity | Mineral Form    |
|---------------|----------------|-----------------|
| 10.767        | 202.578        | Hydroxylapatite |
| 22.959        | 245.07         | Calcite         |
| 24.178        | 82.342         | Kalcanite       |
| 25.776        | 457.372        | Hydroxylapatite |
| 28.833        | 160.632        | Hydroxylapatite |
| 29.303        | 1562.754       | Calcite         |
| 30.314        | 379.947        | Kalcanite       |
| 31.64         | 1906.377       | Hydroxylapatite |
| 32.082        | 744.38         | Hydroxylapatite |
| 32.767        | 750.094        | Hydroxylapatite |

|        |         |                 |
|--------|---------|-----------------|
| 33.954 | 309.787 | Hydroxylapatite |
| 38.107 | 75.415  | Hydroxylapatite |
| 39.333 | 264     | Calcite         |
| 39.666 | 237.138 | Hydroxylapatite |
| 43.064 | 234.498 | Calcite         |
| 44.263 | 127.316 | Kalcanite       |
| 46.578 | 304.19  | Hydroxylapatite |
| 47.392 | 160.475 | Calcite         |
| 48.425 | 256.86  | Calcite         |
| 49.371 | 407.789 | Hydroxylapatite |
| 50.345 | 127.41  | Hydroxylapatite |
| 53.131 | 111.245 | Hydroxylapatite |
| 56.435 | 65.076  | Calcite         |
| 57.347 | 76.356  | Calcite         |

SI 2 - XRD peaks and intensities of hydroxylapatite, calcite and kalcinite for larch biochar sintered with wood ash (WAS)

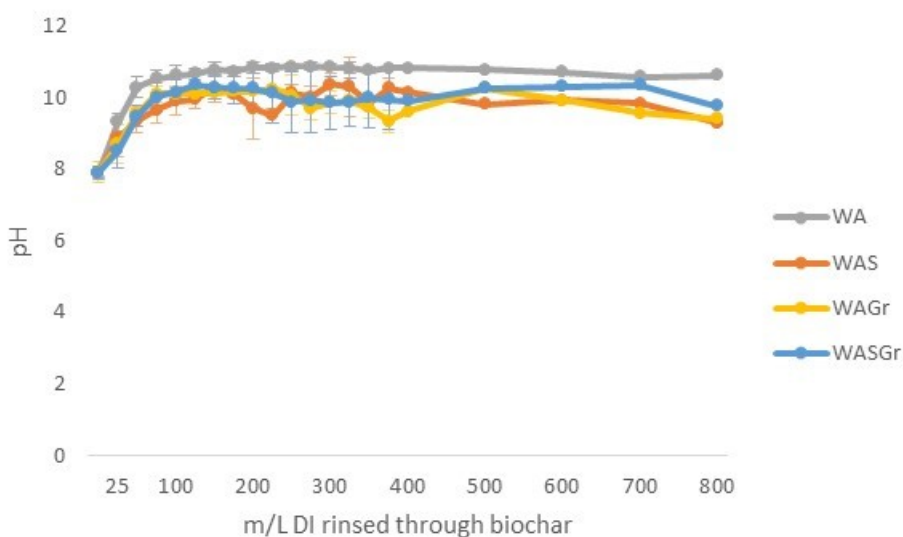

SI 3 – Eluate pH measurements for wood ash mixed cold with larch biochar (WA), wood ash mixed cold and granulated to <3mm (WAGr), wood ash sintered to larch biochar (WAS) and wood ash sintered to larch biochar and granulated to <3mm (WASGr) mg/L when rinsed by 0mL to 800mL of deionised water

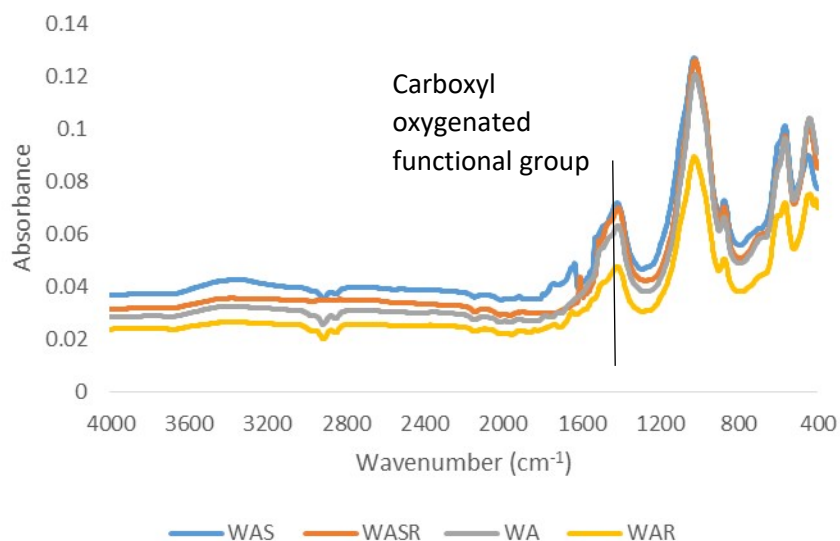

SI 4 – FTIR spectra of larch biochar sintered with wood ash before rinsing with deionised water (WAS) and after rinsing with 800mL of deionised water (WASR) and larch biochar mixed cold with wood ash before rinsing with deionised water (WA) and after rinsing with deionised water (WAR)

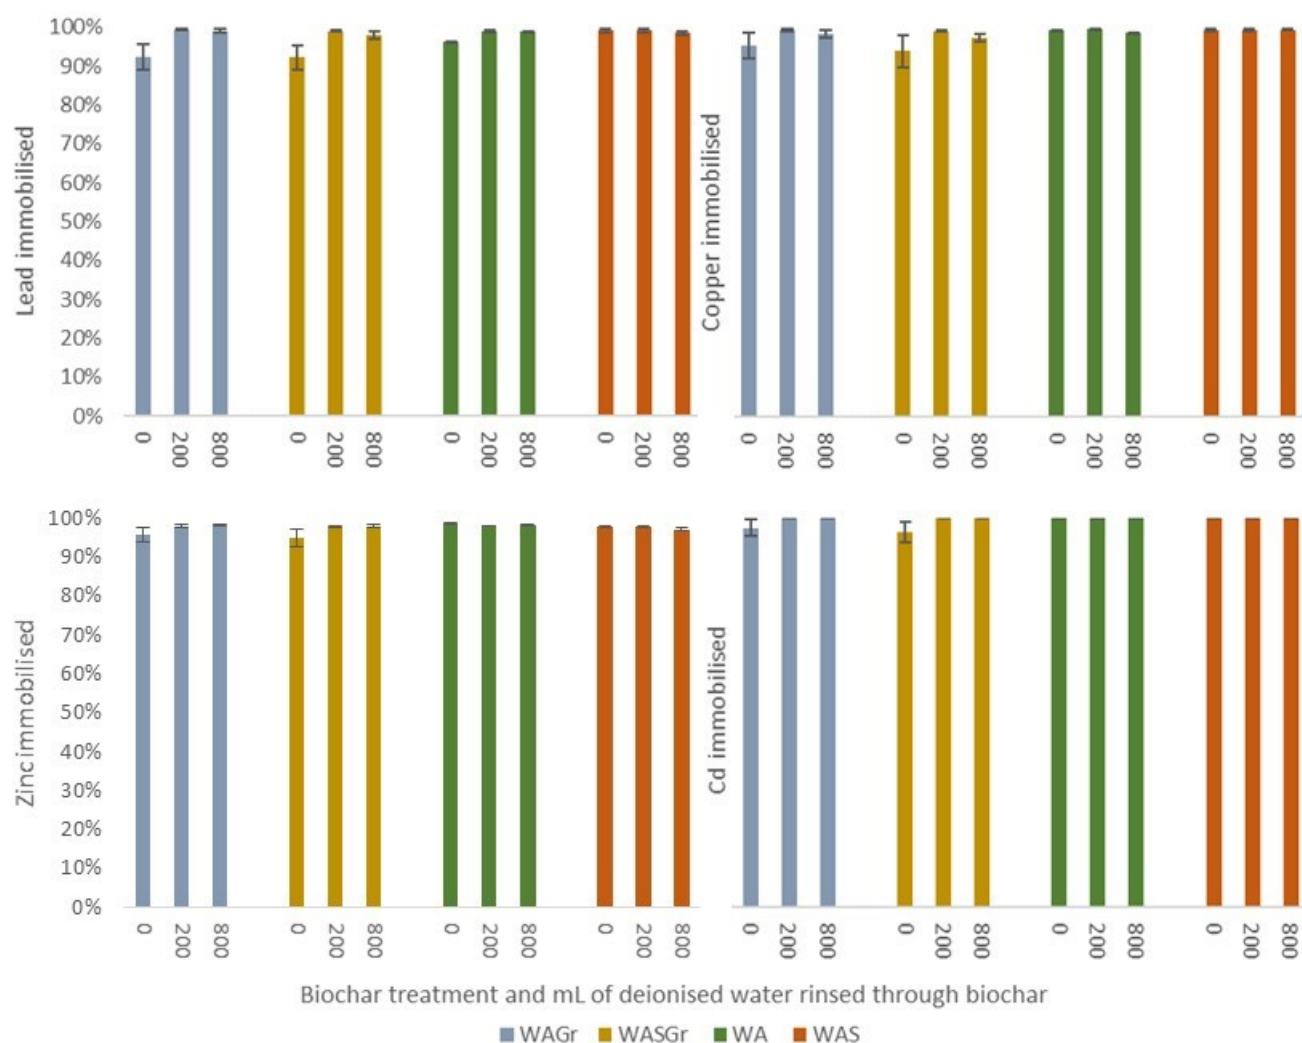

SI 5 - Immobilisation by wood ash mixed cold with larch biochar (WA), wood ash mixed cold and granulated to <3mm (WAGr), wood ash sintered to larch biochar (WAS) and wood ash sintered to larch biochar and granulated to <3mm (WASGr) mg/L when rinsed by 0mL, 200mL and 800mL of (A) lead, (B) copper, (C) zinc and (D) cadmium. The concentration of metals in solution was 10 mg/L.
